1 **Transferrin receptor (Tfr1) ablation in satellite cells impacts skeletal muscle regeneration**  
2 **through the activation of ferroptosis**

3 Hongrong Ding<sup>1,2\*</sup>, Shujie Chen<sup>1,3\*</sup>, Xiaohan Pan<sup>1\*</sup>, Xiaoshuang Dai<sup>6\*</sup>, Guihua Pan<sup>1</sup>, Ze Li<sup>1,4</sup>,  
4 Xudong Mai<sup>1,3</sup>, Ye Tian<sup>1,3</sup>, Susu Zhang<sup>1,3</sup>, Bingdong Liu<sup>1</sup>, Guangchao Cao<sup>7</sup>, Zhicheng Yao<sup>8</sup>,  
5 Xiangping Yao<sup>1,3</sup>, Liang Gao<sup>1</sup>, Li Yang<sup>8</sup>, Xiaoyan Chen<sup>8</sup>, Jia Sun<sup>3</sup>, Hong Chen<sup>3</sup>, Mulan Han<sup>1</sup>,  
6 Yulong Yin<sup>1,10</sup>, Guohuan Xu<sup>1</sup>, Huijun Li<sup>3</sup>, Weidong Wu<sup>3</sup>, Zheng Chen<sup>9</sup>, Jingchao Lin<sup>11</sup>, Liping  
7 Xiang<sup>5</sup>, Yan Lu<sup>5†</sup>, Xiao Zhu<sup>2†</sup>, and Liwei Xie<sup>1,3,4†</sup>

8 <sup>1</sup>State Key Laboratory of Applied Microbiology Southern China, Guangdong Provincial Key  
9 Laboratory of Microbial Culture Collection and Application, Guangdong Open Laboratory of  
10 Applied Microbiology, Guangdong Institute of Microbiology, Guangdong Academy of Sciences,  
11 Guangzhou, China

12 <sup>2</sup>Guangdong Provincial Key Laboratory of Molecular Diagnosis, The Marine Biomedical  
13 Research Institute, Guangdong Medical University, Zhanjiang, China

14 <sup>3</sup>Zhujiang Hospital, Nanfang Medical University, Guangzhou, China

15 <sup>4</sup>College of Public Health, Xinxiang Medical University, Xinxiang, China

16 <sup>5</sup>Key Laboratory of Metabolism and Molecular Medicine, the Ministry of Education, Department  
17 of Endocrinology and Metabolism, Zhongshan Hospital, Fudan University, Shanghai, China.

18 <sup>6</sup>BGI Institute of Applied Agriculture, BGI-Shenzhen, Shenzhen, China

19 <sup>7</sup>The Biomedical Translational Research Institute, Faculty of Medical Science, Jinan University,  
20 Guangzhou, China

21 <sup>8</sup>The Third Affiliated Hospital of Sun Yat-Sen University, Guangzhou, China

22 <sup>9</sup>HIT Center for Life Sciences, School of Life Science and Technology, Harbin Institute of  
23 Technology, Harbin, China.

24 <sup>10</sup>China Institute of Subtropical Agriculture, Chinese Academy of Sciences, Hunan, China

25 <sup>11</sup>Metabo-Profile Biotechnology (Shanghai) Co. Ltd., Shanghai, China

26 \*These authors contribute equally.

27 †To whom correspondence should be addressed:

28 Liwei Xie: xielw@gdim.cn

29 Xiao Zhu: biox Zhu@yahoo.com

30 Yan Lu: lu.yan2@zs-hospital.sh.cn

31 **One Sentence Summary:** Conditional ablation of *Tfr1* in satellite cells (SCs) results in the SC  
32 inactivation, skeletal muscle regeneration defects, labile iron accumulation, and unsaturated fatty  
33 acid biosynthesis, leading to the activation of ferroptosis, which is recapitulated in skeletal  
34 muscles of aged rodents to be a new cell death form identified in skeletal muscle and sheds light  
35 on the development of novel anti-ageing strategies.

36  
37 **Abstract:** Satellite cells (SCs) are critical to the postnatal development and skeletal muscle  
38 regeneration. Inactivation of SCs is linked with the skeletal muscle loss. Leveraging on the  
39 RNAseq screening, transferrin receptor (Tfr1) is identified to be associated with muscle/SC  
40 ageing and the declined regeneration potential. Muscle-specific deletion of *Tfr1* results in the  
41 growth retardation, metabolic disorder and lethality, shedding light on the importance of Tfr1 in  
42 skeletal muscle physiology. Here, our investigation reported that conditional SC-ablation of *Tfr1*  
43 leads to the SCs inactivation and skeletal muscle regeneration defects, followed by the labile iron  
44 accumulation, *de novo* lipogenesis via fibroadipogenic progenitors (FAPs) and Gpx4/Nrf2-  
45 mediated ROS-scavenger defects. These abnormal phenomena, such as Hmox1-mediated  
46 myoglobin degradation, Tfr1-Slc39a14 functional switch and the activation of unsaturated fatty  
47 acid biosynthesis pathway are orchestrated with the occurrence of ferroptosis in skeletal muscle.  
48 Ferroptosis may further prevent SC proliferation and skeletal muscle regeneration. Ferrostatin-1,  
49 a ferroptosis inhibitor could not rescue Tfr1-ablation induced ferroptosis. However,  
50 intramuscular administration of lentivirus expressing Tfr1 could partially reduce labile iron  
51 accumulation, decrease *de novo* lipogenesis and promote skeletal muscle regeneration. Most  
52 importantly, Tfr1/Slc39a14 functional switch, labile iron accumulation and fatty acid  
53 biosynthesis are recapitulated in aged skeletal muscle of rodents, indicating that ferroptosis  
54 occurs in the skeletal muscles of aged rodents. The present study also bridges the gap between  
55 pathogenesis of iron and functional defects in the skeletal muscle, providing mechanistic  
56 information to develop anti-aging strategies.

57

58 **Keywords:** Tfr1, ferroptosis, satellite cells, Fibro/Adipogenic Progenitors

## 59 **Introduction**

60 Programmed cell death (PCD), such as apoptosis, autophagy and the newly discovered  
61 programmed necrosis, called necroptosis, is a critical process to remove dead, unnecessary or  
62 excess cells during organism and tissue development/regeneration(1). Skeletal muscle is a major  
63 organ not only supporting movement but also regulating systemic metabolism. Muscle cell death  
64 occurs in multiple forms, e.g., apoptosis, necrosis and autophagy(2). Under regenerative  
65 conditions, cell death, clearance and regeneration are precisely regulated, while dysregulation of  
66 these processes leads to muscular dystrophy, sarcopenia, and pathogenesis in skeletal muscle(2).  
67 Necrosis of skeletal muscle occurs under various pathogenic conditions, such as muscular  
68 dystrophy and ischemia. However, acute or physiological injuries activate apoptosis, which is  
69 regulated by several crucial molecules, such as an anti-apoptotic oncoproteins Bcl2, Caspase 3  
70 and the death receptor Fas/Apo1/Cd95(3). This process is accompanied by the infiltration of  
71 inflammatory leukocytes, especially macrophages. At the initial stage of regeneration, M1  
72 macrophages are indispensable for cytokine secretion, fiber debris clearance, iron recycling as  
73 well as myoblasts, fibroadipogenic precursor cells (FAPs) and immune cells balancing during  
74 skeletal muscle regeneration(2, 4). Upon completion of fiber debris clearance, M1 macrophages  
75 are transformed into M2 macrophages contributing to the secretion of anti-inflammatory  
76 cytokines and promoting regeneration(2).

77 Along with these, ferroptosis, a newly identified distinct cell death pathway, is involved in  
78 the development of various diseases, such as cancers, ischemia/reperfusion-induced  
79 cardiomyopathy, degenerative diseases and stroke. Ferroptosis is an iron- and reactive oxygen  
80 species (ROS)-dependent oxidative damage via the accumulation of lipid peroxides(5, 6). Cells  
81 experiencing the ferroptosis are characterized by a variety of cytological changes and  
82 abnormalities of the mitochondria, including decreased or vanished mitochondrial cristae, a  
83 ruptured outer mitochondrial membrane, or a condensed mitochondrial membrane(7, 8). A recent  
84 study suggested that during the development of cardiomyopathy death, Nrf2-mediated  
85 upregulation of *Hmox1* contributes to free iron release from heme degradation, leading to the  
86 lipid peroxidation on mitochondrial lipid bilayer as the major mechanism in ferroptosis-induced  
87 heart damage(9). Cardiomyopathy associated ferroptosis is also regulated by *Fth1*-ablation-  
88 induced labile iron accumulation and lipid peroxidation, especially under high-iron diet  
89 feeding(10). Other diseases, such as liver fibrosis or cirrhosis may be associated with iron-

90 dependent cell death. Patients with liver cirrhosis are diagnosed with higher iron content and  
91 lipid peroxidation but lower levels of transferrin (Trf)(11). Liver-specific *Trf*-deletion mice may  
92 be susceptible to the development ferroptosis-induced liver fibrosis under a high-iron diet(11).  
93 Moreover, the pathogenic property of ferroptosis has not been reported in other tissues, such as  
94 skeletal muscle.

95 Skeletal muscle growth and regeneration rely on a subtype of adult stem cells developed  
96 from the mesodermal layer, also called satellite cells (SCs)(12). SCs are considered as adult stem  
97 cells because they maintain the self-renewal and remarkable postnatal regenerative potential of  
98 skeletal muscle. Quiescent SCs are located between the basal lamina and the plasma lemma of  
99 myofibers and are activated by external stimulation or muscle injury, followed by entering the  
100 cell cycle, proliferation and differentiation to repair the injured myotubes. This process is  
101 regulated by a group of myogenic regulatory factors (MRFs), including but not limited to MyoD  
102 and myogenin(13). Some other newly identified transcription factors are also involved in  
103 regulating SC physiology and are further extended to the skeletal muscle development and  
104 regeneration, such as TTP(14), HIF1/2 $\alpha$ (15, 16), and Trp53(17). Dysregulation of these  
105 regulatory factors leads to dysfunction of SC and further causes growth and regeneration  
106 impairment.

107 Meanwhile, skeletal muscle growth and regeneration are accompanied by a precise  
108 regulation of various nutrients, such amino acids, carbohydrates and minerals. Trace minerals as  
109 key nutritional components, play an important role in skeletal muscle physiological function and  
110 energy metabolism. Iron, as an essential trace mineral, is required to maintain the appropriate  
111 function of skeletal muscles, such as muscle cell differentiation, skeletal muscle growth, and  
112 myoglobin synthesis, etc. Iron is released from food and absorbed by epithelial cells of the small  
113 intestine. In the form of transferrin bound iron (TBI), it is recognized, internalized and absorbed  
114 by the action of transferrin receptor 1 (Tfr1), which is ubiquitously expressed in peripheral  
115 tissues such as liver, adipose tissue and skeletal muscles. Thus, Tfr1-mediated iron homeostasis  
116 is a rate-limiting step in regulating tissue growth and regeneration. It has been demonstrated that  
117 skeletal muscle-specific knockout of *Tfr1* blocks iron absorption and leads to dramatic change in  
118 skeletal muscle, liver and adipose tissue metabolism(18). Other studies indicated that skeletal  
119 muscle iron is locally recycled with the involvement of myoblasts and macrophages at the  
120 different stages of skeletal muscle regeneration. Dysregulation of skeletal muscle iron



121 metabolism, especially labile iron accumulation may impair muscle regeneration (19). Free iron-  
122 injection into TA muscle to mimic iron accumulation was shown to induce apoptosis and  
123 regeneration defects(20, 21). ROS generated from free iron lead to dysfunction of skeletal  
124 muscle. However, the biological function of Tfr1 in SC physiology during skeletal muscle  
125 regeneration still remains unknown.

126 In the present study, leveraging on the RNAseq-screening of gene expression in four  
127 different skeletal muscles (TA, EDL, Sol and Gast) at different ages, we identified that *Tfr1*  
128 expression is gradually declined with ageing in both skeletal muscle and SCs. SC-specific  
129 deletion of *Tfr1* leads to decreased regeneration potential of skeletal muscle, with the phenotype  
130 of accumulation of iron and adipocytes, infiltration of macrophages, reduced running ability,  
131 mitochondrial stress and metabolic dysfunction. Gene expression profiling of TA muscle from  
132 *Tfr1<sup>SC/KO</sup>* mice identifies a group of genes associated with ferroptosis, which may cause the  
133 irreversible death of a proportion of SCs, possibly due to upregulation of Slc39a14, a  
134 nontransferrin bound iron (NTBI) transporter to exacerbate iron-mediated cell death.  
135 Unfortunately, Ferrostatin-1, a ferroptosis inhibitor, could not rescue the *Tfr1*-deletion induced  
136 ferroptosis, unless Tfr1 function was restored by lentivirus. This genetic model also recapitulates  
137 one of the unrecognized ageing-related cell deaths in skeletal muscle with decreased membrane-  
138 bound Tfr1 protein but with membrane enrichment of Slc39a14 to uptake NTBI in skeletal  
139 muscle of older mice. Taken together, the current investigation identified a previously  
140 unrecognized function of the Tfr1-Slc39a14-iron axis in SC during skeletal muscle regeneration  
141 and ageing, which sheds light on the development of novel anti-ageing strategies.

142

## 143 **Results**

### 144 ***Tfr1* expression negatively correlates with skeletal muscle ageing**

145 Skeletal muscle development, growth and maintaining are precisely regulated physiological  
146 processes, without which result in sarcopenia(22). To precisely understand these processes,  
147 skeletal muscles (TA, EDL, Sol and Gast) were collected from *C57BL/6J* mice across five  
148 different ages (Figure S1A). RNAseq followed by bioinformatic analysis identified ~5000  
149 differentially expressed genes (DEGs) among four different muscles (TA:5517 genes; EDL:  
150 4583 genes Sol:5529 genes; Gastr: 5865 genes) between the young (2wk-old) and aged (80wk-  
151 old) groups. By plotting the expression of these genes across five ages, we identified a clear

152 trend of gene expression pattern, which was divided into two clusters, a gradually increased  
153 (Cluster I) and decreased (Cluster II) expression of genes (Figure S1B-S1E). Of these DEGs of  
154 four types of muscles, 2445 DEGs were identified, with 1155 upregulated and 1290  
155 downregulated genes (Figure 1A). As shown by functional analysis of the gene ontology against  
156 the biological process gene set, stem cell proliferation and muscle cell differentiation were  
157 downregulated in TA muscle of the aged group (Figure 1B). More specifically, iron metabolism-  
158 related biological function was declined in the aged group, which was also demonstrated by  
159 Gene Set Enrichment Analysis (GSEA) (Figure 1B-C). We also profiled the expression of  
160 transition metal ion homeostasis-related genes such as iron, copper and zinc. It was obvious that  
161 cellular iron homeostasis-related genes were potentially differentially regulated, while genes  
162 involved in copper and zinc ion homeostasis were partially or less differentially regulated across  
163 five different ages (Figure S2A-B). Among these genes, *Tfr1* expression was gradually decreased  
164 with ageing (from 2-wk to 8-wk, 30-wk, 60-wk and even to 80-wk old) (Figure 1D). *Tfr1* is a  
165 membrane-bound protein that recognizes transferrin-bound iron (TBI) and is responsible for TBI  
166 internalizing in peripheral tissue (23). qPCR and western blotting also confirmed that *Tfr1*  
167 mRNA and protein expression was decreased in four different muscles of 8-wk old mice of four  
168 different muscle compared to 2-wk old mice, correspondingly accompanied by decreased non-  
169 heme iron (Figure S2C). These data indicate that *Tfr1*-mediated iron absorption is a rate-limiting  
170 step in skeletal muscles and may be associated with age-related muscle physiology and function.

171

### 172 ***Tfr1* is highly expressed in proliferative satellite cells**

173 SC contributes to not only the skeletal muscle development but also postnatal myofiber  
174 formation and skeletal muscle regeneration(12). However, the biological properties of the *Tfr1*-  
175 iron axis in SCs remain unexplored. Here, by performing single myofiber isolation and  
176 immunostaining, we observed that *Tfr1* protein expression level was higher in SCs of 2wk-old  
177 mice than in SCs of 8wk-old mice (Figure 1H). Pax7, Ki67 and *Tfr1* immunostaining of single  
178 myofibers was performed for both 2wk- and 8wk-old *C57BL/6J* mice. Approximately 70% of  
179 SCs on the myofibers of 2wk-old mice were Ki67<sup>+</sup>, compared with 8wk-old mice, and only ~7%  
180 of SCs turned into Ki67<sup>+</sup>. The *Tfr1* expression level in SCs was highly correlated with the level  
181 of Ki67 expression in SCs. We quantified *Tfr1* protein expression into three levels, High,  
182 Intermediate (Inter), and Low. Here, both *Tfr1*<sup>High</sup>/Ki67<sup>+</sup> and *Tfr1*<sup>Inter</sup>/Ki67<sup>+</sup> SCs were the

183 dominant populations in young mice, while  $Tfr1^{Low}/Ki67^-$  SCs were barely detected. In contrast,  
184 it was completely the opposite in adult mice, whereas  $Tfr1^{Low}/Ki67^+$  SCs were the dominant  
185 population. In adult mice, both the  $Tfr1^{High}/Ki67^+$  and  $Tfr1^{Inter}/Ki67^+$  populations remained at  
186 low amounts (Figure 1I-J). The Tfr1 protein level was also determined in the SCs of aged mice  
187 (>80-wk old). Compared to SCs of adult mice, Tfr1 expression was almost undetectable in SCs  
188 of aged mice (Figure S3A). These results suggest that the Tfr1 protein level in SCs positively  
189 correlates with the cell proliferation status but negatively correlates with skeletal muscle ageing.

190

### 191 ***Tfr1*-mediated iron absorption is indispensable to SC proliferation and differentiation**

192 Tfr1 protein is highly expressed in proliferative cells, while its expression is barely detected  
193 in quiescent SCs. To further prove this hypothesis, single myofibers were isolated and cultured  
194 *ex vivo* to induce SC proliferation and differentiation. In adult quiescent SCs ( $Pax7^+/MyoD^-$ ),  
195 Tfr1 protein was expressed at low level. However, upon *ex vivo* culture, the Tfr1 protein level  
196 was dramatically induced in activated SCs ( $Pax7^+/MyoD^+$ , 24, 48 and 72-hr post-culture) (Figure  
197 S3B-C). This observation could be due to metabolic alterations during activation and  
198 proliferation, which require iron to support mitochondrial energy and glucose metabolism in  
199 newly activated SCs. To support the biological effect of iron on SC proliferation and  
200 differentiation, single myofibers were cultured with the DFO treatment to reduce extracellular  
201 iron availability to SCs. Upon 72-hr of culture, it resulted in a small cluster size, suggesting that  
202 iron is an essential component for SC proliferation (Figure S4A-B). DFO-mediated iron  
203 chelation also led to poor differentiation and myotube formation (Figure S4C-D). Furthermore,  
204 gradually increasing intracellular iron also significantly inhibited SC proliferation, cluster  
205 formation, differentiation and fusion to form mature myotubes (Figure S4E-H). All of these data  
206 indicate that Tfr1-mediated iron homeostasis is critical to support myoblast proliferation and  
207 differentiation.

208

### 209 **Tfr1 is required for maintaining SC homeostasis**

210 To further understand the biological function of Tfr1 in SCs, SC-specific *Tfr1* knockout  
211 mice were generated by crossing mice carrying  $Tfr1^{fl/fl}$  with *Pax7-CreER* transgenic mice. The  
212 genotype of experimental mice was  $Pax7-CreER;Tfr1^{fl/fl}$ . *Tfr1*-KO mice and control littermates  
213 were denominated as  $Tfr1^{SC/KO}$  and  $Tfr1^{SC/WT}$ , respectively. The deletion was induced by

214 intraperitoneal (*i.p.*)-injection of tamoxifen (TMX) for 7 consecutive days as described  
215 previously (24). Single myofiber isolation from EDL of *Tfr1*<sup>SC/WT</sup> and *Tfr1*<sup>SC/KO</sup> was performed,  
216 followed by immunostaining of Pax7, MyoD, and Tfr1. Seven days post-injection (dpi) of  
217 tamoxifen (TMX), the number of Pax7<sup>+</sup> SCs decreased in *Tfr1*<sup>SC/KO</sup> compared to *Tfr1*<sup>SC/WT</sup>  
218 (**Figure 2A-C**). Meanwhile, SCs with ablation of *Tfr1* did not express Ki67 or MyoD, indicating  
219 that *Tfr1*-deletion did not activate SCs (Figure 2A-C). Furthermore, the number of SC on a single  
220 myofiber was counted post-TMX injection (1, 4, 7, 10, 14, 21, and 30-dpi). Short term of TMX  
221 injection (1- and 4-dpi) did not lead to a change in the number of SCs, while the SC number  
222 gradually decreased since 7 dpi of TMX (Figure 2D). Deletion of *Tfr1* in SCs blocks TBI  
223 absorption, which may cause defects in SC proliferation and differentiation. To test this  
224 hypothesis, single myofibers from either *Tfr1*<sup>SC/WT</sup> or *Tfr1*<sup>SC/KO</sup> mice were cultured in horse  
225 serum-coated plates (flowing culture) or collagen-coated plates (attached culture) in the presence  
226 of 4-OH tamoxifen. Tamoxifen-induced deletion of *Tfr1* inhibited SC activation, proliferation  
227 and differentiation, as demonstrated by significantly decreased SC clusters, a reduced number of  
228 SCs in each cluster, failed myotube formation and a lower fusion index (Figure 2E-H). *Tfr1*-  
229 deletion inhibiting myoblast proliferation and differentiation was further tested in myoblasts  
230 bearing floxed *Tfr1*, whereas its deletion was induced by adenovirus expressing Cre  
231 recombinase. Both control and Cre-expressing adenovirus treated myoblasts were incubated with  
232 EdU-containing medium (10  $\mu$ M) for 24-hr. The incorporation of EdU was significantly lower in  
233 the *Tfr1* deletion group (20%) than in the control group (60%) (Figure S5A-D)

234

### 235 ***Tfr1*-deletion disrupts skeletal muscle regeneration via the inhibition of SC proliferation**

236 The biological function of Tfr1 in skeletal muscle was investigated before showing that  
237 *Tfr1*-ablation is lethal if there is no additional ferric iron administration, accompanied by  
238 systemic metabolic disorders(22). To understand the biological function of Tfr1 in the exercise  
239 system regarding skeletal muscle development, growth and regeneration, we utilized mice with  
240 conditional deletion of *Tfr1* in SCs. 14 dpi of TMF, TA muscle was injured by intramuscular  
241 injection of cardiotoxin (CTX) and harvested for further analysis upon the completion of  
242 regeneration (Figure 3A). We observed poor regeneration with Tfr1 dysfunction in SCs, showing  
243 a clear muscular atrophy but clearly no change in body weight (Figure 3B-C). To assess the  
244 biological function of Tfr1 during TA muscle regeneration, the number of Pax7<sup>+</sup> SCs and

245 eMyHC<sup>+</sup> myotubes (newly formed myotubes) was counted. Upon CTX-induced injury (5 and 9  
246 dpi), Pax7<sup>+</sup> SCs were highly proliferated in *Tfr1*<sup>SC/WT</sup> mice, while they were barely detected in  
247 *Tfr1*<sup>SC/KO</sup> mice on TA sections (Figure 3D-E). Low SC numbers were further confirmed by *Pax7*  
248 mRNA expression indicating that *Tfr1* deletion led to the depletion of Pax7<sup>+</sup> SCs upon skeletal  
249 muscle injury (Figure S6A). *Tfr1* KO in SCs also decreased eMyHC<sup>+</sup> myotube formation at 5 dpi  
250 (Figure 3F) while there was a dramatic increase in eMyHC<sup>+</sup> myotubes at 9 dpi (Figure 3G),  
251 which may be due to a robust induction of myogenic transcription factor, *MyoD* expression  
252 (Figure S6A). Upon the completion of regeneration, *Tfr1* KO caused almost complete depletion  
253 of SCs in the TA, followed by atrophy and fibrosis (Figure 3H-K and Figure S6C-E).

254

### 255 **SC *Tfr1* is essential to maintain the skeletal muscle microenvironment and regeneration**

256 To precisely understand how SC-specific knockout of *Tfr1* affects the skeletal muscle  
257 microenvironment, RNAseq was performed to assess the gene expression profile in the TA  
258 muscle between *Tfr1*<sup>SC/WT</sup> and *Tfr1*<sup>SC/KO</sup> mice before or after injury. Approximately 8478  
259 differentially expressed genes were identified among four groups (Figure S7A). Gene clustering  
260 and principal coordinates analysis (PCoA) showed that *Tfr1*<sup>SC/KO</sup> mice with CTX injection  
261 exhibited a distinct molecular signature from the other three groups, which had similar molecular  
262 signatures (Figure 4B). Thus, we focused on DEGs and functional enrichment between *Tfr1*<sup>SC/WT</sup>  
263 and *Tfr1*<sup>SC/KO</sup> mice post-CTX-induced injury. Among DEGs, 3596 genes were upregulated, while  
264 4882 genes were downregulated (Figure 4C). Gene ontology of biological process gene set  
265 analysis identified genes that were majorly involved in dysregulation of immune balancing and  
266 metabolic homeostasis. This was represented by upregulated genes that were associated with  
267 macrophage activation, macrophage-derived foam cell differentiation, lipid biosynthetic process  
268 and collagen biosynthetic process, while downregulated genes were involved in mitochondrial  
269 respiration chain complex assembly, TCA cycle, muscle cell differentiation and fatty acid beta-  
270 oxidation (Figure 4D and Figure S7B-E). The enriched biological functions were further  
271 confirmed by GSEA (Figure 4E and 4H). Here, we found that in regenerated TA muscle, *Tfr1*  
272 knockout resulted in macrophage infiltration, which was assessed by flow cytometry by  
273 detecting M1 (0.17% vs 0.012%) and M2 (0.88% vs 872E-3%) macrophages by their membrane  
274 markers, e.g. *Cd86*, *Cd206* and *Cd163* (Figure 4F). *Cd86*, *Cd206* and *Cd163* mRNA expression  
275 was robustly increased only in regenerated TA of *Tfr1*<sup>SC/KO</sup> mice but not in other groups (Figure

276 4G). Defective muscle regeneration was also accompanied by extracellular collagen biosynthesis  
277 accumulation, with the upregulation of collagen biosynthesis and accumulation related genes  
278 (Figure 4I-L and Figure S7C). This would further interrupt exercise activity by reducing the  
279 running time and distance (Figure 4K-L).

280

## 281 ***Tfr1*-deletion in SCs leads to the dysregulation of lipid and iron metabolism in skeletal** 282 **muscle**

283 SC-specific deletion of *Tfr1* results in dysregulation of local lipid and energy metabolism  
284 (Figure 4D). GSEA analysis further confirmed that adipogenesis indeed occurred in the TA of  
285 *Tfr1*<sup>SC/KO</sup> mice (Figure 5A). Adipogenesis-related genes such as *Fasn* and *Adipoq* were  
286 significantly induced. However, the expression of the fatty acid uptake gene, *Cd36* expression  
287 was not changed, indicating that a local *de novo* lipogenesis instead of external fatty acid uptake  
288 contributed to the lipid accumulation in TA muscle of *Tfr1*<sup>SC/KO</sup> mice (Figure 5B). Lipid  
289 accumulation in TA muscle was visualized by Oil Red O (ORO) staining and immunofluorescent  
290 staining (IF) of Perilipin and Laminin B2. On TA cryosection, a large amount of lipid droplets as  
291 well as Perilipin<sup>+</sup> areas were observed only in TA of *Tfr1*<sup>SC/KO</sup> mice but not in *Tfr1*<sup>SC/WT</sup> mice at  
292 30 dpi (Figure 5C). Other than dysregulation of genes associated with lipid metabolism, most  
293 mitochondrial thermogenesis and iron metabolism-related genes were dramatically  
294 downregulated, such as *Pgc1α*, *Cox7a1* and *Cox8b* for mitochondrial thermogenesis and *Tfr1*,  
295 *Slc11a2*, *Slc40a1* and *Fth1* for iron metabolism, except for a moderate upregulation of *Ftl*  
296 (Figure 5D). As reported before, Tfr1 is indispensable for iron assimilation by skeletal  
297 muscle(25). Muscular dysfunction of the Tfr1 gene results in systemic metabolic disorders, such  
298 as iron deficiency in muscle and liver, as well as systemic glucose and lipid disorders(25). In  
299 contrast, atrophied skeletal muscle of *Tfr1*<sup>SC/KO</sup> mice was not iron deficient instead of having a  
300 large amount of labile iron accumulation (Figure 5E). Furthermore, consistent with  
301 mitochondrial gene expression, transmission electron microscopy revealed swollen mitochondria  
302 with irregular or absent cristae (Figure 5E).

303

## 304 ***Tfr1*-deletion activates ferroptosis in skeletal muscle upon muscular regeneration**

305 Regenerated skeletal muscle of *Tfr1*<sup>SC/KO</sup> mice had upregulated adipogenesis and iron  
306 accumulation in TA muscle. To profile new gene candidates between *Tfr1*<sup>SC/WT</sup> and *Tfr1*<sup>SC/KO</sup>



307 mice at 30 dpi, we discovered a group of ferroptotic genes were dysregulated (e.g. *Gpx4*,  
308 *Slc7a11*, *Acsl4*, and *Hmox1*), along with the KEGG pathway enrichment, including ferroptosis,  
309 biosynthesis of unsaturated fatty acid and glutathione metabolism (Figure 5F-G). Consistent with  
310 previous observations in ferroptosis, *Gpx4*, a glutathione-dependent peroxidase was  
311 downregulated and *Ptgs2* (cyclooxygenase-2: Cox-2), an enzyme converting arachidonic acid  
312 (AA) to prostaglandin endoperoxide H<sub>2</sub> was upregulated (Figure 5H). The activation of  
313 ferroptosis in skeletal muscle was further confirmed by measuring selective biomarker protein  
314 levels. This was shown by the induced protein levels of Acc and Pparg proteins and the  
315 decreased protein levels of Tfr1, PGC1 $\alpha$ , Nrf2, Gpx4 and Fth1, leading to the observation of  
316 adipogenesis and dysregulated iron metabolism, respectively, contributing to the activation of  
317 ferroptosis. Further analysis demonstrated that fatty acid biosynthesis was accompanied by the  
318 unsaturated fatty acid biosynthesis (Figure 5J-K). The critical enzymes in the unsaturated fatty  
319 acid biosynthesis pathway, e.g., *Fasn*, *Elvol5*, *Scd1*, *Scd2*, *Fads1*, and *Fads2* were upregulated,  
320 followed by accumulation of saturated and unsaturated fatty acids (Figure 5L-M, and Figure  
321 S8A-C).

322

### 323 **Ferroptosis decreases muscular regeneration**

324 To map the time-point of ferroptosis occurrence, injured TA muscle from *Tfr1*<sup>SC/WT</sup> and  
325 *Tfr1*<sup>SC/KO</sup> mice at different time points (5, 9, and 15 dpi) was assessed (Figure 6A). The TA/BW,  
326 as well as *Gpx4*, *Slc3a2* and *Ptgs2* expression, was not significantly different between *Tfr1*<sup>SC/WT</sup>  
327 and *Tfr1*<sup>SC/KO</sup> mice at 5 dpi (Figure 6B and Figure S9A-G). However, the expression of iron  
328 homeostasis related genes such as *Slc11a2*, *Slc39a14*, *Fth1* and *Ftl*, was highly upregulated at 5  
329 dpi in *Tfr1*<sup>SC/KO</sup> mice, suggesting that increased iron absorption may occur as early as at 5 dpi  
330 (Figure S9A-G). Starting at 9 dpi, TA/BW started to decrease, followed by downregulation of  
331 *Gpx4* and upregulation of *Ptgs2*, *Slc39a14*, and *Hmox1* expression, so as to the TA at 15 dpi,  
332 except for decreased *Fth1* expression that is associated with oxidization of ferrous iron and iron  
333 storage in ferritin (Figure 6B and Figure S9A-G). Iron accumulation and lipid droplets could be  
334 observed in the TA muscle of *Tfr1*<sup>SC/KO</sup> mice starting at 9 dpi (Figure 6C). During muscle  
335 regeneration, labile iron in regenerative TA muscle was derived from increased non-heme iron  
336 absorption possibly *via* *Slc39a14* and iron recycling from myoglobin from dead muscle cells but  
337 failed to be utilized upon muscular regeneration.



338 Next, we asked whether administration of a ferroptosis inhibitor would reverse the  
339 ferroptosis induced muscular hypotrophy. Ferrostatin-1 (Ferro-1), a ferroptosis inhibitor to  
340 eliminate lipid peroxidation, was *i.p.*-injected upon intramuscular administration of CTX to TA  
341 muscle for 30 consecutive days (Figure 6D). However, Ferro-1 did not rescue ferroptosis-  
342 induced SC/muscle cell death or reduce labile iron accumulation and lipid droplet formation  
343 (Figure 6E-F). Instead, administration of lentivirus-expressing mouse Tfr1 protein could partially  
344 reverse ferroptosis-induced SCs/muscle cell death by decreasing the labile iron accumulation and  
345 lipid biosynthesis (Figure 6G-I).

346

### 347 **Metabolic adaptation of ferroptosis via mitochondrial stress in skeletal muscle**

348 Skeletal muscle-specific deletion of *Tfr1* leads to growth retardation and systemic  
349 metabolic disorder (lipid and amino acid) in both muscle and liver(18). However, for our model,  
350 data from mice kept in metabolic cages presented a significantly higher energy expenditure (EE)  
351 for *Tfr1*<sup>SC/KO</sup> mice than that of *Tfr1*<sup>SC/WT</sup> mice but no difference in the ratio of O<sub>2</sub> consumption  
352 and CO<sub>2</sub> production, meaning that an adaptive alteration of systemic metabolism, especially the  
353 induction of EE, was probably not due to the change in substrate preference and/or whole-body  
354 fuel metabolism (Figure 6J-K). Through the transmission electron microscopy, we observed a  
355 lysosomal structure containing dead mitochondria (M) without any cristae structure and lipid  
356 droplets (LD) in *Tfr1*<sup>SC/KO</sup> mice (Figure 6L), with higher levels of Fgf21 but lower levels of  
357 Trp53 and mitochondrial complex protein (Complexes I, II, III, and V) in the TA of *Tfr1*<sup>SC/KO</sup>  
358 mice (Figure S9). Increased Fgf21 protein may be due to mitochondrial stress(26, 27). To  
359 eliminate potential endocrinological regulation of systemic metabolism and thermogenesis by  
360 Fgf21, iron metabolism and thermogenesis-related genes were determined in liver, iBAT, iWAT  
361 and eWAT, showing that no difference in their gene expression between *Tfr1*<sup>SC/WT</sup> and *Tfr1*<sup>SC/KO</sup>  
362 mice was detected (Figure S10A-H, Supporting Information). However, Glut4 protein levels  
363 were significantly induced in both iWAT and eWAT but not in iBAT (Figure S10F and S10H,  
364 Supporting Information). These results demonstrated that increased EE was not due to the  
365 metabolic alteration in distal tissues instead of the mitochondrial stress with the occurrence of  
366 ferroptosis in skeletal muscle.

367

368 **Skeletal muscle ageing accompanied by a Tfr1 and Slc39a14 functional switch to mediate**  
369 **labile iron accumulation and the activation of ferroptosis**

370 Skeletal muscle ageing is known as sarcopenia with the loss of muscle mass and function,  
371 which may be due to multifactorial conditions, e.g. imbalance between protein synthesis and  
372 degradation(28, 29), reduced number of satellite cells(30) and increased production of ROS(31,  
373 32). It has been reported that aged skeletal muscle has more labile iron(33, 34). To analyze 2445  
374 DEGs between aged and young mice and 1333 DEGs between *Tfr1*<sup>SC/WT</sup> and *Tfr1*<sup>SC/KO</sup> mice,  
375 2203 common biomarkers were identified from two datasets. Among them, 72 genes were  
376 universally upregulated, and 132 genes were downregulated (Figure 7A-B). Through the KEGG  
377 pathway enrichment analysis for these common genes between the two groups, ferroptosis,  
378 glutathione metabolism and fatty acid biosynthesis were the top candidate pathways, suggesting  
379 that skeletal muscle ageing may be accompanied by ferroptosis. Ferrozine assay to assess the  
380 serum and TA muscle non-heme iron showed that compared to the young mice, aged mice had  
381 significantly higher iron levels (Figure 7D). Aged TA muscle expressed lower Tfr1, Gpx4 and  
382 Fth1 but higher Slc39a14, which mimics the gene expression pattern in *Tfr1*<sup>SC/KO</sup> mice (TA total  
383 protein, Figure 7E). Most importantly, TA membrane Tfr1 protein was decreased to undetected  
384 levels but with significantly higher expression levels of Slc39a14 (Figure 7E). These  
385 observations indicated that Slc39a14 facilitates NTBI absorption in aged skeletal muscle causing  
386 iron accumulation and ferroptosis. Meanwhile, Ferro-1 as a ferroptosis inhibitor, was *i.p.*-  
387 injected into aged mice upon intramuscular injection of CTX to induce injury and regeneration.  
388 Thirty days post-injection indeed revealed improved running capacity, such as running time and  
389 distance, but did not reach the statistical significance (Figure 7F).

390

391 **Discussion**

392 Programmed cell death, such as apoptosis, autophagy, and necrosis, is stimulated by external  
393 factors in response to muscle injury. Dysregulation of these processes results in muscle loss and  
394 sarcopenia. Here, in our regeneration defect model, we are surprised to identify a new form of  
395 cell death, which has not been reported elsewhere in skeletal muscle. Newly defined iron-  
396 dependent cell death, also named ferroptosis is activated during muscle regeneration with *Tfr1*-  
397 deletion in SCs. This event is coupled with the upregulation of *Slc39a14* expression to uptake  
398 NTBI, unsaturated fatty acid biosynthesis, and decreased expression of anti-ferroptosis

399 biomarkers such as Gpx4 and Nrf2. Most importantly, the scenario of Tfr1-Slc39a14-iron axis is  
400 recapitulated in aged skeletal muscle of rodents, which provides physiological relevance of the  
401 Tfr1-Slc39a14-iron axis and ferroptosis in skeletal muscle.

402 Iron homeostasis is indispensable to the proper function of skeletal muscle and postnatal  
403 regeneration, reflected from the importance of iron in mitochondrial respiration, ATP production,  
404 muscle contraction and exercise capacity. This is partially due to the activity of the  
405 mitochondrial electron transport chain and mitochondrial clearance(35). These observations  
406 could be manipulated in murine models fed with iron-deprived diets, but muscular iron  
407 deficiency in patients is usually accompanied by secondary diseases, such as congestive heart  
408 failure and chronic obstructive pulmonary disease(36, 37). In terms of the developmental  
409 essentiality of iron, numerous studies have demonstrated that iron deficiency during pregnancy  
410 or the early stage of development causes growth retardation. However, a high systemic iron level  
411 is detrimental to the host, especially at advanced age. Genome-wide association studies (GWAS)  
412 identified the association between healthy longevity and iron traits, e.g., serum iron, transferrin  
413 level, and transferrin saturation(38). Furthermore, individuals at advanced age experience iron  
414 accumulation in multiple organs, such as the brain, skeletal muscle and liver(39). In contrast to  
415 iron deficiency, iron overloading or accumulation in tissue leads to increased oxidative stress by  
416 producing highly toxic hydroxyl radicals through the Fenton reaction. High iron content,  
417 especially the non-heme iron (NHI), is associated with decreased muscle mass in both elderly  
418 human and aged rat skeletal muscle(19, 40). Evidence from different studies are consistent  
419 including ours that aged skeletal muscle has a phenotype of elevated NHI content, impaired  
420 muscle function and muscular atrophy. In the *ex vivo* culture system, a high iron content  
421 decreases the single myofiber survival rate, reduces SC cluster formation and prohibits myoblast  
422 differentiation. However, the mechanisms causing iron accumulation and muscle loss remain  
423 unknown and need further exploration.

424 To delve into the pathogenic effect of iron and identify the potential mediator, we used  
425 multiple approaches and models to explore. As reported previously(40), we also noted declined  
426 *Tfr1* mRNA and protein in both skeletal muscles and SCs of older mice but with higher NHI  
427 levels in skeletal muscle(39). We also found that the membrane Tfr1 protein is almost  
428 undetectable in aged mice (>80-wk old) compared to young mice (~8-wk old). To profile the  
429 expression of other iron absorption related genes, *Slc11a2* and *Slc39a14* expression were

430 upregulated in TA muscle of 80wk-old mice (Figure 1D). However, Slc11a2-mediated TBI iron  
431 absorption in peripheral tissue relies on the membrane Tfr1 protein. Our work for the first-time  
432 identifies the phenomenon of Tfr1/Slc39a14 expression switching in aged skeletal muscle. More  
433 specifically, Slc39a14 expression is induced and its protein is enriched on the cellular membrane  
434 to facilitate NTBI absorption to replace Tfr1. This corresponds to the NHI accumulation in aged  
435 TA muscle. Our work provided evidence to interpret how labile iron accumulated in the aged  
436 skeletal muscle.

437 Under physiological conditions, ferric iron in the form of transferrin-bound iron (TBI)  
438 recognized by membrane Tfr1 is absorbed in peripheral tissues, such as liver, adipose tissue,  
439 skeletal muscle, and bone marrow(23, 41, 42). Multiple studies have shown that *Tfr1*-deficiency  
440 results in functional disorder and even death. Mice with *Tfr1* conditional knockout in  
441 hematopoietic stem cells died within one week after birth(43). Our previous study demonstrated  
442 that Tfr1 regulates adipocyte thermogenesis and cell fate determination(44). Adipocytes with  
443 *Tfr1* ablation exhibit reduced thermogenic capacity and beigeing potential(44). Meanwhile, an  
444 alpha-skeletal actin (HSA)-driven Cre recombinase expression results in embryonic dysfunction  
445 of *Tfr1*, disrupting iron homeostasis and leading to the muscle growth retardation(18). This may  
446 be associated with dysfunction of heme-containing myoglobin synthesis and energy metabolism  
447 in muscle and liver. However, postnatal function of Tfr1 in skeletal muscle could not be well-  
448 explored by utilizing this model as postnatal growth and regeneration of skeletal muscle rely on  
449 the activity of SCs. Thus, to solve the discrepancy, mice with conditional knockout of *Tfr1* in  
450 SCs were generated. In addition to regeneration defects, during muscle regeneration, we  
451 observed that failed SCs activation and muscle regeneration, myoglobin degradation by heme  
452 oxygenase 1 (*Hmox1*) and upregulation of *Slc39a14* expression may be three key factors  
453 contributing to labile iron accumulation, which may also be followed by decreased expression of  
454 *Fth1*, and increased *de novo* unsaturated fatty acid biosynthesis. A similar observation was made  
455 in aged skeletal muscle: *Slc39a14* and *Hmox1* are upregulated, and the downregulation of *Tfr1*  
456 and *Fth1* expression contributes to the labile iron accumulation in skeletal muscle. A similar  
457 observation has been made in a macrophage-specific iron exporting protein, ferroportin (*Fpn*)  
458 ablation model(4). In this model, monocyte-derived macrophages are indispensable in damaged  
459 skeletal muscle to secrete pro- or anti-inflammatory cytokines, which are necessary for the  
460 clearance of remnants and iron recycling. Although activated macrophages have a large portion

461 of the intracellular labile iron pool, they have lower storage capacity and have to release iron into  
462 intracellular space to be utilized by newly formed myofibers(45, 46). Macrophage-mediated iron  
463 recycling and muscular regeneration must be well-coordinated as macrophages provide a  
464 temporary storage site for iron to prevent oxidative damage and then subsequently supply  
465 nutrients for muscle regeneration.

466 Well-coordinated iron recycling and utilization between macrophages and newly formed  
467 myofibers has been proven to be critical to muscular regeneration. Thus, *Tfr1*-ablation in SCs  
468 results in an excessive amount of iron released from macrophages to the labile iron pool in  
469 skeletal muscle, but is not to be absorbed because of the defect in functional myofiber formation.  
470 Replenishment of Tfr1 protein via lentivirus infection partially decreases labile iron  
471 accumulation, prohibits fat biogenesis and promotes regeneration. The labile iron accumulation  
472 for one aspect is derived from myoglobin degradation by Hmox1 and additional NTBI  
473 absorption is facilitated by Slc39a14, as the expression of both genes is upregulated in *Tfr1<sup>SC/KO</sup>*  
474 5 dpi and remains at higher expression levels at 9 and 15 dpi, which definitely exacerbates iron  
475 accumulation and oxidative damage. It has been reported that in the absence of macrophage  
476 Fpn , iron sequestered inside the macrophages not only prevents muscle regeneration but also  
477 activates adipogenesis, leading to fat accumulation(4). *Tfr1<sup>SC/KO</sup>* mice present *de novo*  
478 lipogenesis instead of fatty acid uptake *via Cd36* by upregulating expression of fatty acid  
479 synthase (*Fasn*) and the activation of the unsaturated fatty acid biogenesis pathway (e.g. *Scd1*,  
480 *Scd2*, *Fads1*, *Fads2*, and *Elvol5*). This is possible due to the activation of fibroadipogenic  
481 precursor cells (FAPs), a mesenchymal population located in the interstitial area of the skeletal  
482 muscle. FAPs are able to spontaneously differentiate into adipocyte or fibroblasts in *ex vivo*  
483 culture systems(47). In *in vivo* system, FAPs are able to differentiate into adipocytes in  
484 degenerating dystrophic muscles while ectopic adipogenesis and fatty infiltration could be  
485 strongly inhibited by the presence of SC-derived myofibers(48). Intramuscular fatty infiltration  
486 in skeletal muscle could be inhibited by IL-15 expression, possibly affecting FAP differentiation  
487 through Hedgehog signaling and other cytokines, e.g. IL-4 and IL-13 secreted from eosinophils  
488 to remove cellular debris, enhancing regeneration(49–52). Skeletal muscle regeneration also  
489 requires network interactions among various cell types, such as endothelial cells, immune cells  
490 and motor neurons(53). Numerous studies have demonstrated that muscle regeneration begins

491 from 3 to 5 days after injury and peaks during the second week after injury(54). Single-cell  
492 sequencing technology further demonstrates that skeletal muscle regeneration depends on a  
493 heterogeneous cell population, and regulated by various intra- and extracellular factors with the  
494 involvement of paracrine communication between SCs and nonmyogenic cells at different  
495 regeneration stages(55, 56). In *Tfr1*<sup>SC/WT</sup> mice, we observed the peak of new myofiber formation  
496 at 5 dpi and almost complete of regeneration at 9 dpi as reported before(56), *Tfr1*-ablation fails  
497 to activate SCs and significantly delays the regeneration. In the TA of *Tfr1*<sup>SC/KO</sup> mice, both *Pax7*  
498 and *MyoD* mRNA were expressed at lower levels corresponding to decreased SC proliferation,  
499 and less newly generated myofibers at 5 dpi. We also did not observe any changes in the  
500 expression of ferroptosis related genes, such as *Gpx4* and *Ptgst2* at 5 dpi. However, as early as 5  
501 dpi, some biomarkers that potentially contribute to the accumulation of labile iron, such as  
502 *Slc39a14* and *Hmox1* were upregulated in TA of *Tfr1*<sup>SC/KO</sup> mice, which could explain the  
503 phenomenon of massive iron accumulation at later time points. Even though *MyoD* expression  
504 was upregulated at 9 dpi (compared to *MyoD* expression at 5 dpi) in TA of *Tfr1*<sup>SC/KO</sup> mice,  
505 followed by the initiation of regeneration and a small number of eMyHC<sup>+</sup> myofibers at small  
506 diameters, this may not have enough functional myofibers to utilize the iron and secrete  
507 cytokines to prevent adipogenesis. Skeletal muscle regeneration is further exacerbated by  
508 downregulation of *Gpx4*, a ROS scavenger, and *Fth1*, an important portion of ferritin, as well as  
509 upregulation of *Slc39a14*, an NTBI transporter and *Ptgs2*, involved in peroxidase generation at 9  
510 dpi. The dysregulated iron homeostasis and adipogenesis results in the activation of ferroptosis.  
511 Ferritin degradation via reduced *Fth1* expression is associated with the activation of ferroptosis,  
512 which is defined as ferritinophagy(57, 58). We believe that *Tfr1*-ablation in SCs is a critical  
513 starting point of the skeletal muscle regeneration defect but not the ferroptosis marker, as  
514 reported before(59). Most importantly, this *Tfr1* genetic deletion model and *Tfr1*-*Slc39a14*  
515 functional switching recapitulate a physiological downregulation or dysfunction of *Tfr1* in  
516 skeletal muscle and SCs during ageing in skeletal muscle of rodents. Ferroptosis activation is  
517 orchestrated by decreased *Tfr1* membrane protein and *Slc39a14* membrane enrichment to  
518 facilitate NTBI iron absorption contributing to labile iron accumulation in aged skeletal muscle.  
519 Moreover, FAPs derived abnormal fibrosis and adipogenesis in aged muscle contributes to  
520 abnormal lipid accumulation(60), in together with iron accumulation and Fenton reaction leading  
521 to the activation of ferroptosis in skeletal muscle. These circumstances are also observed in aged



522 skeletal muscle of rodents with the age-dependent risk of ferroptosis, which was reported  
523 elsewhere in the brain(61, 62).

524 In addition to ferroptosis-mediated dysregulation of iron and lipid metabolism in skeletal  
525 muscle, we also observed systemic dysregulation of energy metabolism. Our electron  
526 transmission microscope images demonstrated that ferroptosis is followed by swollen  
527 mitochondria with irregular or disappeared cristae, immune cell infiltration, lysosome-mediated  
528 mitochondrial degradation or swollen mitochondria and lipid droplets in a membrane surrounded  
529 structure with lysosome. Along with the ferroptosis in the TA of *Tfr1*<sup>SC/KO</sup> mice, altered systemic  
530 energy metabolism is displayed with increased energy expenditure and expression of FGF21.  
531 FGF21 was initially discovered to be secreted from the liver regulating energy balance and  
532 glucose and lipid metabolism(63). In skeletal muscle under healthy and physiological conditions,  
533 its expression remains at a lower level. However, FGF21-induced muscle atrophy/weakness  
534 during fasting or FGF21 overexpression *in vivo* in muscle is sufficient to induce autophagy and  
535 muscle loss by 15%(64). Its deletion could protect against muscle loss and weakness during  
536 fasting, which is accompanied by a significant reduction of mitophagy flux(64). Other than its  
537 pathological function in skeletal muscle, FGF21 is a potent stimulator of adipocyte  
538 thermogenesis and nutrient metabolism to improve insulin sensitivity and reduce hepatic lipid  
539 accumulation(63, 65). Studies have suggested that autocrine and paracrine actions of FGF21 are  
540 able to induce thermogenic effects in adipocytes to improve glucose metabolism, lipid profiles  
541 and anti-obesity effects(66–68). Between *Tfr1*<sup>SC/WT</sup> and *Tfr1*<sup>SC/KO</sup> mice, accompanied by increased  
542 EE but no significant difference in ratio of VCO<sub>2</sub>/VO<sub>2</sub> and the adipocyte thermogenic signaling  
543 pathway was not observed, indicating that a Ucp1-independent mechanism may be involved.  
544 Ucp1-independent thermogenic pathways, such as creatine metabolism, calcium cycling, and  
545 amino acid uncoupling, promote systemic energy metabolism(69–71). FGF21 or FGF21 mimetic  
546 antibody stimulates brown or white adipocyte thermogenesis in a Ucp1-independent manner,  
547 which may act via directly promoting the host metabolic activity(72) or the FGFR1/bKlotho  
548 complex(73), respectively.

549 Meanwhile, resident and monocyte-derived macrophages also contribute to the skeletal  
550 muscle regeneration at different stages. The depletion of macrophage in Tg-ITGAM-DTR mice  
551 impairs regeneration and results in the lipid accumulation in the skeletal muscle(74).  
552 Macrophages in skeletal muscle play a fundamental role in muscle repair and debris clearance.



553 Upon initiation of muscle damage, infiltrated monocytes/neutrophil in injured areas differentiate  
554 into proinflammatory macrophage (M1 Macrophage) with exposure to interferon-(IFN)  $\gamma$  and  
555 tumor necrosis factor (TNF) $\alpha$  to phagocyte necrotic muscle debris (75). M2 macrophage  
556 polarization majorly presents at the advanced stage of tissue repair and wound healing in concert  
557 with the secretion of IL-14 and IL13 from Th2 cytokines. Alternatively, M2 macrophages are  
558 also associated with the fibrosis in *mdx* mouse model, indicating M2 macrophages may have  
559 alternative function under pathological condition (76, 77). Despite the compelling evidence of  
560 different macrophage subtypes during muscle repair, we identified a significant accumulation of  
561 M2 macrophages in the TA of *Tfr1*<sup>SC/KO</sup> mice, leading to the development of fibrosis and  
562 unexpected macrophage-derived foam cell differentiation. Foam cells are associated with the  
563 development of atherosclerosis, and are also implicated in proinflammatory cytokine secretion,  
564 different inflammatory cells recruitment and fibrotic collagen accumulation, which further  
565 exacerbates tissue function and impairs tissue repair(78). However, the pathological function of  
566 foam cells in skeletal muscle requires further exploration.

567 In summary, the current investigation reveals that SCs with ablation of *Tfr1* impairs skeletal  
568 muscle regeneration with the activation of ferroptosis. This process is accompanied by Tfr1-  
569 Slc39a14 functional switch to mediate NHI absorption and labile iron accumulation in the  
570 skeletal muscle. This phenomenon is recapitulated in the skeletal muscle of aged rodents, which  
571 may shed light on the development of anti-ageing strategies.

572

## 573 **Materials and Methods**

### 574 *Animals and treatment*

575 *C57BL/6J* mice were purchased from the Center of Guangdong Experimental Animal  
576 Laboratory and housed in a temperature and humidity controlled and ventilated specific pathogen  
577 free (SPF) cages at animal facility of Guangdong Institute of Microbiology. All animal handling  
578 and procedures were approved by the Animal Care and Use Committee at Guangdong Institute  
579 of Microbiology [Permission #: GT-IACUC201704071]. All experimental mice were placed on a  
580 12-hr light: dark cycle with *ad libitum* access to food and water.

581 Mice with *Tfr1*-specific deletion in SCs were generated by crossing mice carrying *Pax7*-  
582 *CreER* and *Tfr1*<sup>fl/fl</sup> allele. The genotype was *Pax7-CreER;Tfr1*<sup>fl/fl</sup> designated as homozygous  
583 (*Tfr1*<sup>SC/KO</sup>) and as control littermate (*Tfr1*<sup>SC/WT</sup>). SCs-specific *Tfr1* deletion was generated by

584 intraperitoneal (*i.p.*)-injection of Tamoxifen (T5648, Sigma) dissolved in corn oil for 7  
585 consecutive days at dose of 15 mg/ml as described before(24). *Pax7-CreER* mice were shared by  
586 Dr. Dahai Zhu from Institute of Basic Medical Sciences (Chinese Academy of Medical  
587 Sciences), originally purchased from Jackson Laboratory (Stork No: 017763) and *Tfr1<sup>fl/fl</sup>* mice  
588 were directly purchased from Jackson Laboratory (Stok No: 028363).

589 To induce muscle injury, Cardiotoxin (CTX, 0.5 nmol, 100  $\mu$ l) was intramuscularly  
590 administrate. For the drug treatment, CTX-injured mice were *i.p.*-injected with Saline or  
591 Ferrostatin-1 (2  $\mu$ mol/kg, SML0583, Sigma), a ferroptosis inhibitor for 30 days. For lentivirus  
592 administration, mice with CTX-injured TA muscle were intramuscularly administrated with  
593 control or lentivirus with *Tfr1*-expression.

594

#### 595 *Lentivirus packaging*

596 293T cells seeded in 10 cm plate at 95% confluency were transiently transfected with  
597 shuttling vector (pCDH-Tfr1, kindly shared by Dr. Fudi Wang or empty vector) and packaging  
598 vectors (pVSVg and psPax2) by TransIT X2 (MIR60000, MirusBio). 12 hrs after transfection,  
599 culture medium was replaced with fresh DMEM supplemented with 10% fetal bovine serum  
600 (FBS,01010102, Trinity). Medium containing lentivirus were harvested respectively at 36 and 60  
601 hrs after transfection. Lenti-X concentrator (PT4421-2, Clontech) was mixed at the ratio of 1:3  
602 and incubated at 4 °C for a short time. The mixture was then centrifuged to obtain a high titer  
603 virus containing pellet, which was resuspended in 500  $\mu$ l PBS/saline solution and stored in -80  
604 °C freezer.

605

#### 606 *RNA isolation and real-time PCR*

607 Total RNA of skeletal muscles, liver, iBAT, iWAT or eWAT was extracted with TRIzol™  
608 reagent (1596018, Thermo Fisher) and reverse transcribed by utilizing 5x All-In-One Master  
609 Mix (G485, AbmGood) according to the manufacture's instruction. cDNA was used to analyze  
610 gene expression by Power SYBR Green Master Mix (4367659, Thermo Fisher) on a  
611 QuantStudio 6 Flex Real-Time PCR System (Thermo Fisher). The primer sequences for qRT-  
612 PCR were listed in Table 1.

613

614 *RNAseq and bioinformatic analysis*

615 Total RNA samples from *C57BL6/J* mice at different age (n=3 per group) or *Tfr1*<sup>SC/WT</sup> and  
616 *Tfr1*<sup>SC/KO</sup> (n=5 per group) before or after CTX-injury at 30 dpi were sequenced using a BGI-  
617 SEQ2000 platform (Beijing Genomics Institute). Raw RNA-seq reads in FASTQ format were  
618 quality checked with FASTQC algorithm, and low-quality reads were trimmed using the  
619 FASTX-Toolkit. High-quality reads were aligned to the mouse genome (GRCm38/mm10) using  
620 HISAT2(79) and assembled against mouse mRNA annotation using HTSeq(80). Differentially  
621 expressed genes (DEGs) were analyzed by using DESeq2 package in R(81). Genes were  
622 considered to be significantly upregulated or downregulated at *p*<sub>adj</sub><0.05. Heatmaps were  
623 generated using the pheatmap package in R based on raw count of DEGs. Gene ontology (GO)  
624 analysis was performed using the R package, named clusterProfiler for DEGs (either up- or  
625 down-regulated)(82). DEGs (*p*<sub>adj</sub><0.05) were further analyzed using Gene Set Enrichment  
626 Analysis (GSEA)(83). Both upregulated and downregulated genes were functionally categorized  
627 with the GO and Hallmark gene sets.

628

629 *Iron assay*

630 Skeletal muscles (TA, EDL, Sol and Gas) non-heme iron levels or serum iron levels were  
631 determined following a standard protocol as described before(84). In short, weight skeletal  
632 muscles were homogenized in H<sub>2</sub>O and equal volume of acid solution (10% trichloroacetic acid  
633 in 3 M HCl) added. Samples were digested for 1-hr at 100 °C. 75 µl digested sample or iron  
634 standard was mixed with 75 µl ferrozine solution (1mM Ferrozine, 3M Sodium Acetate and 1%  
635 mercaptoacetic acid), followed with incubation at 37 °C for 1-hr before the colorimetric was read  
636 at 565 nm by a microplate photometer (Thermo Fisher). The iron level of each sample was  
637 normalized by the weight of skeletal muscles and presented as micrograms of iron per gram of  
638 wet tissue weight.

639

640 *Oil Red O staining*

641 4% PFA fixed TA sections were stained in an Oil Red O (ORO) solution following a  
642 standard protocol as described before. The nuclei were counter-stained with haematoxylin before  
643 mounted with glycerol-containing mounting medium.

644

645 *Perls' Prussian's Blue staining*

646 Non-heme iron staining was performed by utilizing a standard Perl's Prussian Blue Staining  
647 protocol as previously described(84). Images were visualized and captured with a light  
648 microscope.

649

650 *Masson's Trichrome stain*

651 Masson's Trichrome stain was performed using Masson's Trichrome Stain Kit (Aniline Blue)  
652 following the manufacturer's instructions (MA0123, Meilunbio). Briefly, Masson's Trichrome  
653 stain was performed on 10 µm cryosection of TA muscle fixed with 95% alcohol for 20-min.  
654 Sections then were incubated different solutions supplemented in Masson's Trichrome Stain Kit.  
655 At the end, the section was dehydrated with 95% alcohol for 10s, two rinses in anhydrous  
656 alcohol for 10 s and 2 rinses in xylene for 1 min each. The sections were mounted with Neutral  
657 balsam for imaging and fibrosis quantification. TA fibrosis quantification was performed by  
658 using Image J. CVF (Collagen volume fraction), which is calculated to be the ratio of the  
659 collagen-positive blue area versus the total tissue area.

660

661 *Hematoxylin and Eosin (H&E) staining*

662 TA sections at 10 µm were stained with hematoxylin and eosin solution by following a  
663 standard protocol as described before(44). Sections were dehydrated and mounted with DPX  
664 Mountant (44581, Sigma). Histological images were visualized and captured by a light  
665 microscope.

666

667 *Protein isolation and western blot*

668 Total protein lysates were prepared and resolved on SDS-PAGE as described before(85).  
669 Protein band on a PVDF membrane was probed with primary antibodies (Cav1: D161423,  
670 Tubulin: D225847, Sangon Biotech; Tfr1: ab84036, Mitochondrial Complex: ab110413, Abcam;  
671 PGC1α: ab3242, Millipore;, Pparγ: sc-7273, Fth1: sc-376594, Ftl: sc-74513, Santa Cruz  
672 Biotechnology; Gpx4: A1933, Abclonal; Slc39a14: PA5-21077, Thermo Fisher; Acc:3676; Nrf2:  
673 12721, Cell Signaling Technology) overnight, followed with secondary antibodies incubation at  
674 RT for 1-hr. Images were acquired using the ChemiDoc™ Imaging System (Bio-Rad).

675

676 *Myofiber isolation, culture and immunofluorescence staining*

677 Single myofibers were isolated from extensor digitorum longus (EDL) muscle following the  
678 method as described before(24, 86). Briefly, EDL muscle was isolated and incubated in digestion  
679 medium containing 0.2% collagenase for 75-min. After digestion, myofibers were transferred to  
680 a horse serum coated 24-well plate and gently washed for three times with the washing medium  
681 (DMEM supplemented with 10% FBS: fetal bovine serum and 1% P.S.: Penicillin and  
682 Streptavidin). For non-cultured myofiber, at least 100 myofibers for each group were fixed with  
683 4% paraformaldehyde (PFA, P6148, Sigma) and immunostaining was performed following a  
684 standard protocol. For myofiber culture, single myofiber was either cultured in a horse-serum-  
685 coated 24-well plate (for non-attached culture) or a collagen-coated 24-well plate (for attached  
686 culture). In each well, ~20 myofibers were washed for three times before replaced with culture  
687 medium (DMSM supplemented with 20% FBS, 1% P.S. and 1% CEE: chicken embryo extract,  
688 (C19041654, USBiological) with or without 4-OH-Tamoxifen (1  $\mu$ m, H7904, Sigma). For non-  
689 attached culture, after 72-hr culture, single myofibers with SCs-cluster were fixed with 4% PFA  
690 and immunostaining was performed following a standard protocol. For attached culture, after 72-  
691 hr culture, SCs cluster attached the culture plate and proliferated for 4-6 days until reaching 85%  
692 confluency, followed with 3 days differentiation with 2% horse-serum. The myotubes were fixed  
693 with 4% PFA, followed with immunostaining. Single myofiber or differentiated myotubes were  
694 permeabilized with 0.5% Triton-100 for 10 mins before blocking with sterilized PBS containing  
695 3% BSA, 5% goat serum and 0.5% tween 20). Primary antibodies (DSHB: Pax7: PAX7,  
696 eMyHC: F1.652, MHC:20-s, Abcam: Tfr1: ab84036 and Active Motif: MyoD:39991; Ki67:ZM-  
697 0167, ZSGB-Bio) were incubated overnight at 4 °C and secondary antibodies at RT for 1 hr at  
698 dark. Myofibers were mounted with DAPI-containing mounting medium (F6057, Sigma). To  
699 quantify the number of SCs, Pax7<sup>+</sup> SCs on myofibers with Tfr1, MyoD, and Ki67 expression  
700 were counted. Images were visualized and captured with EVOS Cell Imaging Systems (EVOS  
701 FL, Thermo Fisher) or Confocal Microscope (Zessie 710).

702

703 *Myoblast isolation and culture*

704 Primary myoblasts were isolated from 2-week old *Tfr1<sup>fl/fl</sup>* mice as described before(24).  
705 Primary myoblasts were cultured on a collagen-coated tissue cell culture dish in Nutrient  
706 Mixture F-10 Ham (N6635, Sigma) supplemented with 20% FBS, 1% P/S, 5ug/L FGF-basic

707 (100-18B, PeproTech). For proliferation analysis, primary myoblasts were infected with  
708 adenovirus expressing Cre recombinase at 50 MOI to induce Tfr1-deletion, followed by  
709 incubation with EdU for 24 hrs before harvest for immunostaining by utilizing the Click-iT™  
710 EdU Cell Proliferation Kit (C10337, Thermo Fisher).

711

#### 712 *Cryosection and immunofluorescence staining*

713 TA muscle was dissected, mounted, frozen and sectioned at 10 µm as described before (24).  
714 TA section was fixed with 1% PFA, and antigen retrieval was performed with Tris-EDTA buffer  
715 (Tris 1.21g and EDTA 0.37g dissolved in 1L ddH<sub>2</sub>O, pH 9.0) for 1-hr at 100 °C. Sections were  
716 permeabilized with 0.5% Triton-100 for 10-min and blocked with blocking buffer (PBS with 3%  
717 BSA and 5% goat serum) for 1 hr. Primary antibodies was incubated O.N. at 4°C (Wheat Germ  
718 Agglutinin (WGA):W32466, Thermo Fisher; LaminB2: 05-206, Millipore; DSHB: Pax7: PAX7,  
719 type I: #BA-D5, type IIA: SC-71, type IIB: BF-F3 and type IIX: 6H1-s, Perilipin: 9349, Cell  
720 Signaling Technology), followed by secondary antibodies incubation at R.T. for 1-hr in dark  
721 room. Nuclei were counterstained with DAPI-containing mounting medium (F6057, Sigma). The  
722 image was visualized and captured with the EVOS Cell Imaging Systems (Thermo Fisher).

723

#### 724 *Transmission electron microscopy*

725 TA muscle injury was induced by intramuscular injection of CTX for both *Tfr1*<sup>SC/KO</sup> and  
726 control littermates. 15 days after injury, TA samples (1 mm x 1 mm x 1mm) were quickly  
727 dissected and immediately fixed in 4% phosphate-glutaraldehyde. Each sample was dehydrated,  
728 permeabilized, embedded, sectioned at 60-80 nm and mounted. For each sample, five fields of  
729 view were randomly selected and the images were captured.

730

#### 731 *Treadmill exhaustion test*

732 Treadmill exhaustion test was performed for both *Tfr1*<sup>SC/KO</sup> and control littermates before  
733 and after CTX-induced muscle regeneration. The treadmill running protocol was started with an  
734 adaptation period of 10 m/min for 20-min before an increase of 2 m/min every 20-min until  
735 fatigue response initiated. The treadmill running protocol was terminated when mice no longer  
736 responded to 5 consecutive fatigue stimuli. Upon fatigue initiated, mice were quickly removed



737 from treadmill running lane. Treadmill running time and distance was recorded and calculated  
738 for all mice.

739

#### 740 *Flow cytometry*

741 Single-cell suspensions were incubated with purified anti-CD16/CD32 Abs (clone 2.4G2,  
742 Sungene Biotech, Tianjin, China) for 15 min to block Fc receptors. After wash, cells were  
743 stained with eFluor 450-anti-mouse CD45 (clone 30-F11, Invitrogen), Percp-Cy5.5-anti-  
744 mouse/human CD11b (clone M1/70, Biolegend), PE-Cy7-anti-mouse F4/80 (clone BM8,  
745 Biolegend), APC-anti-mouse CD86 (clone GL-1, Biolegend), FITC-anti-mouse CD206 (clone  
746 C068C2, Biolegend) or isotype controls at 4°C for 15 min and detected by flow cytometry  
747 (FACSVerse, BD). Data were analyzed using FlowJo software (V10). Macrophages were  
748 identified as CD45<sup>+</sup>/CD11b<sup>+</sup>/F4/80<sup>+</sup>, and the percentage of pro-inflammatory (CD86<sup>+</sup>) and anti-  
749 inflammatory (CD206<sup>+</sup>) macrophages were analyzed and shown.

750

#### 751 *Statistical analysis*

752 Experiment results were presented as mean ± SEM. Bar plots and statistical analysis were  
753 generated using GraphPad Prism 7 by using Unpaired Student's T tests or One-Way ANOVA  
754 with  $p < 0.05$  were considered significantly different. Representation of the  $p$ -values was as  
755 follows: \* $p < 0.05$ , \*\* $p < 0.01$ , \*\*\* $p \leq 0.001$ , N.S.: not significant ( $p \geq 0.05$ ).

756

#### 757 **References and Notes:**

- 758 1. M. Raff, Cell suicide for beginners, *Nature* **396**, 119–122 (1998).
- 759 2. C. Sciorati, E. Rigamonti, A. A. Manfredi, P. Rovere-Querini, Cell death, clearance and  
760 immunity in the skeletal muscle, *Cell Death Differ.* **23**, 927–937 (2016).
- 761 3. Y. Tsujimoto, Multiple ways to die: non-apoptotic forms of cell death. *Acta Oncol.* **51**, 293–  
762 300 (2012).
- 763 4. G. Corna, I. Caserta, A. Monno, P. Apostoli, A. A. Manfredi, C. Camaschella, P. Rovere-  
764 Querini, The Repair of Skeletal Muscle Requires Iron Recycling through Macrophage  
765 Ferroportin, *J. Immunol.* **197**, 1914–1925 (2016).
- 766 5. S. J. Dixon, K. M. Lemberg, M. R. Lamprecht, R. Skouta, E. M. Zaitsev, C. E. Gleason, D. N.  
767 Patel, A. J. Bauer, A. M. Cantley, W. S. Yang, B. Morrison, B. R. Stockwell, Ferroptosis: An  
768 iron-dependent form of nonapoptotic cell death, *Cell* **149**, 1060–1072 (2012).



- 769 6. W. S. Yang, B. R. Stockwell, Synthetic Lethal Screening Identifies Compounds Activating  
770 Iron-Dependent, Nonapoptotic Cell Death in Oncogenic-RAS-Harboring Cancer Cells, *Chem.*  
771 *Biol.* **15**, 234–245 (2008).
- 772 7. Y. Xie, W. Hou, X. Song, Y. Yu, J. Huang, X. Sun, R. Kang, D. Tang, Ferroptosis: Process  
773 and function, *Cell Death Differ.* **23**, 369–379 (2016).
- 774 8. N. Yagoda, M. Von Rechenberg, E. Zaganjor, A. J. Bauer, W. S. Yang, D. J. Fridman, A. J.  
775 Wolpaw, I. Smukste, J. M. Peltier, J. J. Boniface, R. Smith, S. L. Lessnick, S. Sahasrabudhe, B.  
776 R. Stockwell, RAS-RAF-MEK-dependent oxidative cell death involving voltage-dependent  
777 anion channels, *Nature* **447**, 864–868 (2007).
- 778 9. X. Fang, H. Wang, D. Han, E. Xie, X. Yang, J. Wei, S. Gu, F. Gao, N. Zhu, X. Yin, Q. Cheng,  
779 P. Zhang, W. Dai, J. Chen, F. Yang, H. T. Yang, A. Linkermann, W. Gu, J. Min, F. Wang,  
780 Ferroptosis as a target for protection against cardiomyopathy, *Proc. Natl. Acad. Sci. U. S. A.* **116**,  
781 2672–2680 (2019).
- 782 10. F. Xuexian, C. Zhaoxian, W. Hao, H. Dan, C. Qi, Z. Pan, G. Feng, Y. Yingying, S. Zijun, W.  
783 Qian, A. Peng, H. Sicong, P. Jianwei, C. Hou-Zao, C. Jinghai, L. Andreas, M. Junxia, W. Fudi,  
784 Loss of Cardiac Ferritin H Facilitates Cardiomyopathy via Slc7a11-Mediated Ferroptosis, *Circ.*  
785 *Res.* **127**, 486–501 (2020).
- 786 11. Y. Yu, L. Jiang, H. Wang, Z. Shen, Q. Cheng, P. Zhang, J. Wang, Q. Wu, X. Fang, L. Duan,  
787 S. Wang, K. Wang, P. An, T. Shao, R. T. Chung, S. Zheng, J. Min, F. Wang, Hepatic transferrin  
788 plays a role in systemic iron homeostasis and liver ferroptosis., *Blood* **136**, 726–739 (2020).
- 789 12. H. Yin, F. Price, M. A. Rudnicki, Satellite cells and the muscle stem cell niche., *Physiol. Rev.*  
790 **93**, 23–67 (2013).
- 791 13. H. Yin, F. Price, M. A. Rudnicki, Satellite Cells and the Muscle Stem Cell Niche, *Physiol.*  
792 *Rev.* **93**, 23–67 (2013).
- 793 14. M. A. Hausburg, J. D. Doles, S. L. Clement, A. B. Cadwallader, M. N. Hall, P. J. Blackshear,  
794 J. Lykke-Andersen, B. B. Olwin, Post-transcriptional regulation of satellite cell quiescence by  
795 TTP-mediated mRNA decay, *Elife* **4** (2015), doi:10.7554/eLife.03390.
- 796 15. L. Xie, A. Yin, A. S. Nichenko, A. M. Beedle, J. A. Call, H. Yin, Transient HIF2A inhibition  
797 promotes satellite cell proliferation and muscle regeneration, *J. Clin. Invest.* **128**, 2339–2355  
798 (2018).
- 799 16. X. Yang, S. Yang, C. Wang, S. Kuang, The hypoxia-inducible factors HIF1alpha and  
800 HIF2alpha are dispensable for embryonic muscle development but essential for postnatal muscle  
801 regeneration., *J. Biol. Chem.* **292**, 5981–5991 (2017).
- 802 17. C. Wang, W. Liu, Z. Liu, L. Chen, X. Liu, S. Kuang, Hypoxia Inhibits Myogenic  
803 Differentiation through p53 Protein-dependent Induction of Bhlhe40 Protein., *J. Biol. Chem.*  
804 **290**, 29707–16 (2015).
- 805 18. T. Barrientos, I. Laothamatas, T. R. Koves, E. J. Soderblom, M. Bryan, M. A. Moseley, D.  
806 M. Muoio, N. C. Andrews, Metabolic Catastrophe in Mice Lacking Transferrin Receptor in  
807 Muscle., *EBioMedicine* **2**, 1705–1717 (2015).

- 808 19. M. Altun, E. Edström, E. Spooner, A. Flores-Moralez, E. Bergman, P. Tollet-Egnell, G.  
809 Norstedt, B. M. Kessler, B. Ulfhake, Iron load and redox stress in skeletal muscle of aged rats,  
810 *Muscle and Nerve* **36**, 223–233 (2007).
- 811 20. Y. Ikeda, A. Satoh, Y. Horinouchi, H. Hamano, H. Watanabe, M. Imao, M. Imanishi, Y.  
812 Zamami, K. Takechi, Y. Izawa-Ishizawa, L. Miyamoto, T. Hirayama, H. Nagasawa, K. Ishizawa,  
813 K. I. Aihara, K. Tsuchiya, T. Tamaki, Iron accumulation causes impaired myogenesis correlated  
814 with MAPK signaling pathway inhibition by oxidative stress, *FASEB J.* **33**, 9551–9564 (2019).
- 815 21. R. Cui, S. E. Choi, T. H. Kim, H. J. Lee, S. J. Lee, Y. Kang, J. Y. Jeon, H. J. Kim, K. W.  
816 Lee, Iron overload by transferrin receptor protein 1 regulation plays an important role in  
817 palmitate-induced insulin resistance in human skeletal muscle cells, *FASEB J.* **33**, 1771–1786  
818 (2019).
- 819 22. M. Tieland, I. Trouwborst, B. C. Clark, Skeletal muscle performance and ageing., *J.*  
820 *Cachexia. Sarcopenia Muscle* **9**, 3–19 (2018).
- 821 23. J. E. Levy, O. Jin, Y. Fujiwara, F. Kuo, N. C. Andrews, Transferrin receptor is necessary for  
822 development of erythrocytes and the nervous system., *Nat. Genet.* **21**, 396–399 (1999).
- 823 24. L. Xie, A. Yin, A. S. Nichenko, A. M. Beedle, J. A. Call, H. Yin, Transient HIF2A inhibition  
824 promotes satellite cell proliferation and muscle regeneration, *J. Clin. Invest.* **128**, 2339–2355  
825 (2018).
- 826 25. T. Barrientos, I. Laothamatas, T. R. Koves, E. J. Soderblom, M. Bryan, M. A. Moseley, D.  
827 M. Muoio, N. C. Andrews, Metabolic Catastrophe in Mice Lacking Transferrin Receptor in  
828 Muscle., *EBioMedicine* **2**, 1705–17 (2015).
- 829 26. S. Forsström, C. B. Jackson, C. J. Carroll, M. Kuronen, E. Pirinen, S. Pradhan, A.  
830 Marmyleva, M. Auranen, I. M. Kleine, N. A. Khan, A. Roivainen, P. Marjamäki, H. Liljenbäck,  
831 L. Wang, B. J. Battersby, U. Richter, V. Velagapudi, J. Nikkanen, L. Euro, A. Suomalainen,  
832 Fibroblast Growth Factor 21 Drives Dynamics of Local and Systemic Stress Responses in  
833 Mitochondrial Myopathy with mtDNA Deletions, *Cell Metab.* **30**, 1040-1054.e7 (2019).
- 834 27. M. Ost, V. Coleman, A. Voigt, E. M. van Schothorst, S. Keipert, I. van der Stelt, S. Ringel,  
835 A. Graja, T. Ambrosi, A. P. Kipp, M. Jastroch, T. J. Schulz, J. Keijer, S. Klaus, Muscle  
836 mitochondrial stress adaptation operates independently of endogenous FGF21 action, *Mol.*  
837 *Metab.* **5**, 79–90 (2016).
- 838 28. S. Welle, C. Thornton, R. Jozefowicz, M. Statt, Myofibrillar protein synthesis in young and  
839 old men., *Am. J. Physiol.* **264**, E693-8 (1993).
- 840 29. A. M. Cuervo, J. F. Dice, Age-related decline in chaperone-mediated autophagy., *J. Biol.*  
841 *Chem.* **275**, 31505–31513 (2000).
- 842 30. G. Shefer, D. P. Van de Mark, J. B. Richardson, Z. Yablonka-Reuveni, Satellite-cell pool  
843 size does matter: defining the myogenic potency of aging skeletal muscle., *Dev. Biol.* **294**, 50–  
844 66 (2006).
- 845 31. C. S. Broome, A. C. Kayani, J. Palomero, W. H. Dillmann, R. Mestril, M. J. Jackson, A.  
846 McArdle, Effect of lifelong overexpression of HSP70 in skeletal muscle on age-related  
847 oxidative stress and adaptation after nondamaging contractile activity., *FASEB J. Off. Publ. Fed.*  
848 *Am. Soc. Exp. Biol.* **20**, 1549–1551 (2006).

- 849 32. J. Palomero, A. Vasilaki, D. Pye, A. McArdle, M. J. Jackson, Aging increases the oxidation  
850 of dichlorohydrofluorescein in single isolated skeletal muscle fibers at rest, but not during  
851 contractions., *Am. J. Physiol. Regul. Integr. Comp. Physiol.* **305**, R351-8 (2013).
- 852 33. S. H. Jung, L. R. DeRuisseau, A. N. Kavazis, K. C. DeRuisseau, Plantaris muscle of aged  
853 rats demonstrates iron accumulation and altered expression of iron regulation proteins, *Exp.*  
854 *Physiol.* **93**, 407–414 (2008).
- 855 34. T. Hofer, E. Marzetti, J. Xu, A. Y. Seo, S. Gulec, M. D. Knutson, C. Leeuwenburgh, E. E.  
856 Dupont-Versteegden, Increased iron content and RNA oxidative damage in skeletal muscle with  
857 aging and disuse atrophy, *Exp. Gerontol.* **43**, 563–570 (2008).
- 858 35. P. A. Leermakers, A. H. V. Remels, M. I. Zonneveld, K. M. A. Rouschop, A. M. W. J.  
859 Schols, H. R. Gosker, Iron deficiency-induced loss of skeletal muscle mitochondrial proteins and  
860 respiratory capacity; the role of mitophagy and secretion of mitochondria-containing vesicles,  
861 *FASEB J.* **34**, 6703–6717 (2020).
- 862 36. M. Tkaczyszyn, M. Drozd, K. Węgrzynowska-Teodorczyk, I. Flinta, K. Kobak, W.  
863 Banasiak, P. Ponikowski, E. A. Jankowska, Depleted iron stores are associated with inspiratory  
864 muscle weakness independently of skeletal muscle mass in men with systolic chronic heart  
865 failure., *J. Cachexia. Sarcopenia Muscle* **9**, 547–556 (2018).
- 866 37. A. Barberan-Garcia, D. A. Rodríguez, I. Blanco, J. Gea, Y. Torralba, A. Arbillaga-Etxarri, J.  
867 A. Barberà, J. Vilaró, J. Roca, M. Orozco-Levi, Non-anaemic iron deficiency impairs response to  
868 pulmonary rehabilitation in COPD., *Respirology* **20**, 1089–1095 (2015).
- 869 38. J. F. Wilson, P. K. Joshi, Multivariate genomic scan implicates novel loci and haem  
870 metabolism in human ageing, *Nat. Commun.* , 1–10 (2020).
- 871 39. J. Xu, M. D. Knutson, C. S. Carter, C. Leeuwenburgh, Iron accumulation with age, oxidative  
872 stress and functional decline, *PLoS One* **3** (2008), doi:10.1371/journal.pone.0002865.
- 873 40. K. C. DeRuisseau, Y.-M. Park, L. R. DeRuisseau, P. M. Cowley, C. H. Fazen, R. P. Doyle,  
874 Aging-related changes in the iron status of skeletal muscle, *Exp. Gerontol.* **48**, 1294–1302  
875 (2013).
- 876 41. C. Fillebeen, E. Charlebois, J. Wagner, A. Katsarou, J. Mui, H. Vali, D. Garcia-Santos, P.  
877 Ponka, J. Presley, K. Pantopoulos, Transferrin receptor 1 controls systemic iron homeostasis by  
878 fine-tuning hepcidin expression to hepatocellular iron load., *Blood* **133**, 344–355 (2019).
- 879 42. J. Li, X. Pan, G. Pan, Z. Song, Y. He, S. Zhang, X. Ye, X. Yang, E. Xie, X. Wang, X. Mai,  
880 X. Yin, B. Tang, X. Shu, P. Chen, X. Dai, Y. Tian, L. Yao, M. Han, G. Xu, H. Zhang, J. Sun, H.  
881 Chen, F. Wang, J. Min, L. Xie, Transferrin Receptor 1 Regulates Thermogenic Capacity and Cell  
882 Fate in Brown / Beige Adipocytes, *Adv. Sci.* **1903366** (2020), doi:10.1002/advs.201903366.
- 883 43. S. Wang, X. He, Q. Wu, L. Jiang, L. Chen, Y. Yu, P. Zhang, X. Huang, J. Wang, Z. Ju, J.  
884 Min, F. Wang, Transferrin receptor 1-mediated iron uptake plays an essential role in  
885 hematopoiesis., *Haematologica* **105**, 2071–2082 (2020).
- 886 44. J. Li, X. Pan, G. Pan, Z. Song, Y. He, S. Zhang, X. Ye, X. Yang, E. Xie, X. Wang, X. Mai,  
887 X. Yin, B. Tang, X. Shu, P. Chen, X. Dai, Y. Tian, L. Yao, M. Han, G. Xu, H. Zhang, J. Sun, H.  
888 Chen, F. Wang, J. Min, L. Xie, Transferrin Receptor 1 Regulates Thermogenic Capacity and Cell  
889 Fate in Brown/Beige Adipocytes, *Adv. Sci.* **7** (2020), doi:10.1002/advs.201903366.

- 890 45. C. Gaetano, L. Massimo, M. Alberto, Control of iron homeostasis as a key component of  
891 macrophage polarization, *Haematologica* **95**, 1801–1803 (2010).
- 892 46. G. Corna, L. Campana, E. Pignatti, A. Castiglioni, E. Tagliafico, L. Bosurgi, A. Campanella,  
893 S. Brunelli, A. A. Manfredi, P. Apostoli, L. Silvestri, C. Camaschella, P. Rovere-Querini,  
894 Polarization dictates iron handling by inflammatory and alternatively activated macrophages,  
895 *Haematologica* **95**, 1814–1822 (2010).
- 896 47. M. Marinkovic, C. Fuoco, F. Sacco, A. Cerquone Perpetuini, G. Giuliani, E. Micarelli, T.  
897 Pavlidou, L. L. Petrilli, A. Reggio, F. Riccio, F. Spada, S. Vumbaca, A. Zuccotti, L. Castagnoli,  
898 M. Mann, C. Gargioli, G. Cesareni, Fibro-adipogenic progenitors of dystrophic mice are  
899 insensitive to NOTCH regulation of adipogenesis, *Life Sci. Alliance* **2**, e201900437 (2019).
- 900 48. A. Uezumi, S. I. Fukada, N. Yamamoto, S. Takeda, K. Tsuchida, Mesenchymal progenitors  
901 distinct from satellite cells contribute to ectopic fat cell formation in skeletal muscle, *Nat. Cell*  
902 *Biol.* **12**, 143–152 (2010).
- 903 49. D. Kopinke, E. C. Roberson, J. F. Reiter, Ciliary Hedgehog Signaling Restricts Injury-  
904 Induced Adipogenesis, *Cell* **170**, 340–351.e12 (2017).
- 905 50. X. Kang, M. Y. Yang, Y. X. Shi, M. M. Xie, M. Zhu, X. L. Zheng, C. K. Zhang, Z. L. Ge, X.  
906 T. Bian, J. T. Lv, Y. J. Wang, B. H. Zhou, K. L. Tang, Interleukin-15 facilitates muscle  
907 regeneration through modulation of fibro/adipogenic progenitors, *Cell Commun. Signal.* **16**, 1–11  
908 (2018).
- 909 51. J. E. Heredia, L. Mukundan, F. M. Chen, A. A. Mueller, R. C. Deo, R. M. Locksley, T. A.  
910 Rando, A. Chawla, Type 2 innate signals stimulate fibro/adipogenic progenitors to facilitate  
911 muscle regeneration, *Cell* **153**, 376–388 (2013).
- 912 52. Y. Dong, K. A. S. Silva, Y. Dong, L. Zhang, Glucocorticoids increase adipocytes in muscle  
913 by affecting IL-4 regulated FAP activity, *FASEB J.* **28**, 4123–4132 (2014).
- 914 53. B. Biferali, D. Proietti, C. Mozzetta, L. Madaro, Fibro–Adipogenic Progenitors Cross-Talk in  
915 Skeletal Muscle: The Social Network, *Front. Physiol.* **10**, 1–10 (2019).
- 916 54. J. Huard, Y. Li, F. H. Fu, Muscle injuries and repair: current trends in research., *J. Bone Joint*  
917 *Surg. Am.* **84**, 822–832 (2002).
- 918 55. A. J. De Micheli, E. J. Laurilliard, C. L. Heinke, H. Ravichandran, P. Fraczek, S. Soueid-  
919 Baumgarten, I. De Vlaminck, O. Elemento, B. D. Cosgrove, Single-Cell Analysis of the Muscle  
920 Stem Cell Hierarchy Identifies Heterotypic Communication Signals Involved in Skeletal Muscle  
921 Regeneration, *Cell Rep.* **30**, 3583–3595.e5 (2020).
- 922 56. S. N. Oprescu, F. Yue, J. Qiu, L. F. Brito, S. Kuang, Temporal Dynamics and Heterogeneity  
923 of Cell Populations during Skeletal Muscle Regeneration, *iScience* **23**, 100993 (2020).
- 924 57. M. Gao, P. Monian, Q. Pan, W. Zhang, J. Xiang, X. Jiang, Ferroptosis is an autophagic cell  
925 death process., *Cell Res.* **26**, 1021–1032 (2016).
- 926 58. W. Hou, Y. Xie, X. Song, X. Sun, M. T. Lotze, H. J. 3rd Zeh, R. Kang, D. Tang, Autophagy  
927 promotes ferroptosis by degradation of ferritin., *Autophagy* **12**, 1425–1428 (2016).
- 928 59. H. Feng, K. Schorpp, J. Jin, C. E. Yozwiak, B. G. Hoffstrom, A. M. Decker, P. Rajbhandari,  
929 M. E. Stokes, H. G. Bender, J. M. Csuka, P. S. Upadhyayula, P. Canoll, K. Uchida, R. K. Soni,



- 930 K. Hadian, B. R. Stockwell, Transferrin Receptor Is a Specific Ferroptosis Marker, *Cell Rep.* **30**,  
931 3411-3423.e7 (2020).
- 932 60. A. W. B. Joe, L. Yi, A. Natarajan, F. Le Grand, L. So, J. Wang, M. A. Rudnicki, F. M. V  
933 Rossi, Muscle injury activates resident fibro/adipogenic progenitors that facilitate myogenesis.,  
934 *Nat. Cell Biol.* **12**, 153–163 (2010).
- 935 61. A. A. Belaidi, A. I. Bush, Iron neurochemistry in Alzheimer’s disease and Parkinson’s  
936 disease: targets for therapeutics., *J. Neurochem.* **139 Suppl**, 179–197 (2016).
- 937 62. M. Buijs, N. T. Doan, S. van Rooden, M. J. Versluis, B. van Lew, J. Milles, J. van der Grond,  
938 M. A. van Buchem, In vivo assessment of iron content of the cerebral cortex in healthy aging  
939 using 7-Tesla T2\*-weighted phase imaging., *Neurobiol. Aging* **53**, 20–26 (2017).
- 940 63. B. M. Owen, D. J. Mangelsdorf, S. A. Kliewer, Tissue-specific actions of the metabolic  
941 hormones FGF15/19 and FGF21, *Trends Endocrinol. Metab.* **26**, 22–29 (2015).
- 942 64. L. J. Oost, M. Kustermann, A. Armani, B. Blaauw, V. Romanello, Fibroblast growth factor  
943 21 controls mitophagy and muscle mass., *J. Cachexia. Sarcopenia Muscle* **10**, 630–642 (2019).
- 944 65. A. Kharitonov, R. DiMarchi, FGF21 Revolutions: Recent Advances Illuminating FGF21  
945 Biology and Medicinal Properties, *Trends Endocrinol. Metab.* **26**, 608–617 (2015).
- 946 66. M. K. Badman, P. Pissios, A. R. Kennedy, G. Koukos, J. S. Flier, E. Maratos-Flier, Hepatic  
947 Fibroblast Growth Factor 21 Is Regulated by PPAR $\alpha$  and Is a Key Mediator of Hepatic Lipid  
948 Metabolism in Ketotic States, *Cell Metab.* **5**, 426–437 (2007).
- 949 67. T. Inagaki, P. Dutchak, G. Zhao, X. Ding, L. Gautron, V. Parameswara, Y. Li, R. Goetz, M.  
950 Mohammadi, V. Esser, J. K. Elmquist, R. D. Gerard, S. C. Burgess, R. E. Hammer, D. J.  
951 Mangelsdorf, S. A. Kliewer, Endocrine Regulation of the Fasting Response by PPAR $\alpha$ -Mediated  
952 Induction of Fibroblast Growth Factor 21, *Cell Metab.* **5**, 415–425 (2007).
- 953 68. F. F. Fisher, S. Kleiner, N. Douris, E. C. Fox, R. J. Mepani, F. Verdeguer, J. Wu, A.  
954 Kharitonov, J. S. Flier, E. Maratos-Flier, B. M. Spiegelman, FGF21 regulates PGC-1 $\alpha$  and  
955 browning of white adipose tissues in adaptive thermogenesis, *Genes Dev.* **26**, 271–281 (2012).
- 956 69. L. Kazak, E. T. Chouchani, M. P. Jedrychowski, S. P. Gygi, M. Bruce, L. Kazak, E. T.  
957 Chouchani, M. P. Jedrychowski, B. K. Erickson, K. Shinoda, P. Cohen, R. Vetrivelan, G. Z. Lu,  
958 D. Laznik-bogoslavski, S. C. Hasenfuss, S. Kajimura, S. P. Gygi, B. M. Spiegelman, Article A  
959 Creatine-Driven Substrate Cycle Enhances Energy Expenditure and Thermogenesis in Beige Fat  
960 Article A Creatine-Driven Substrate Cycle Enhances Energy Expenditure and Thermogenesis in  
961 Beige Fat, *Cell* **163**, 643–655 (2015).
- 962 70. J. Z. Long, K. J. Svensson, L. A. Bateman, H. Lin, T. Kamenecka, I. A. Lokurkar, J. Lou, R.  
963 R. Rao, M. R. R. Chang, M. P. Jedrychowski, J. A. Paulo, S. P. Gygi, P. R. Griffin, D. K.  
964 Nomura, B. M. Spiegelman, The Secreted Enzyme PM20D1 Regulates Lipidated Amino Acid  
965 Uncouplers of Mitochondria, *Cell* **166**, 424–435 (2016).
- 966 71. K. Ikeda, Q. Kang, T. Yoneshiro, J. P. Camporez, H. Maki, M. Homma, K. Shinoda, Y.  
967 Chen, X. Lu, P. Maretich, K. Tajima, K. M. Ajuwon, T. Soga, S. Kajimura, UCP1-independent  
968 signaling involving SERCA2b-mediated calcium cycling regulates beige fat thermogenesis and  
969 systemic glucose homeostasis., *Nat. Med.* **23**, 1454–1465 (2017).

- 970 72. S. Keipert, D. Lutter, B. O. Schroeder, D. Brandt, M. Ståhlman, T. Schwarzmayr, E. Graf, H.  
971 Fuchs, M. H. De Angelis, M. H. Tschöp, J. Rozman, M. Jastroch, obesity resistance of UCP1-de  
972 ficient mice, *Nat. Commun.* (2020), doi:10.1038/s41467-019-14069-2.
- 973 73. M. Z. Chen, J. C. Chang, J. Zavala-solorio, L. Kates, M. Thai, A. Ogasawara, X. Bai, S.  
974 Flanagan, V. Nunez, K. Phamluong, J. Ziai, R. Newman, FGF21 mimetic antibody stimulates  
975 UCPI-independent brown fat thermogenesis via FGFR1 / b Klotho complex in non-adipocytes,  
976 *Mol. Metab.* **6**, 1454–1467 (2017).
- 977 74. L. M. Id, A. T. Id, M. De Bardi, F. F. C. Id, M. P. Id, G. R. D. Id, G. Imeneo, M. Bouch, L.  
978 Puri, F. D. S. Id, Macrophages fine tune satellite cell fate in dystrophic skeletal muscle of mdx  
979 mice, *PLOS Biol.* , 1–29 (2019).
- 980 75. A. Mantovani, A. Sica, S. Sozzani, P. Allavena, A. Vecchi, M. Locati, The chemokine  
981 system in diverse forms of macrophage activation and polarization., *Trends Immunol.* **25**, 677–  
982 686 (2004).
- 983 76. S. A. Villalta, H. X. Nguyen, B. Deng, T. Gotoh, J. G. Tidball, Shifts in macrophage  
984 phenotypes and macrophage competition for arginine metabolism affect the severity of muscle  
985 pathology in muscular dystrophy., *Hum. Mol. Genet.* **18**, 482–496 (2009).
- 986 77. B. Vidal, A. L. Serrano, M. Tjwa, M. Suelves, E. Ardite, R. De Mori, B. Baeza-Raja, M.  
987 Martínez de Lagrán, P. Lafuste, V. Ruiz-Bonilla, M. Jardí, R. Gherardi, C. Christov, M.  
988 Dierssen, P. Carmeliet, J. L. Degen, M. Dewerchin, P. Muñoz-Cánoves, Fibrinogen drives  
989 dystrophic muscle fibrosis via a TGFbeta/alternative macrophage activation pathway., *Genes*  
990 *Dev.* **22**, 1747–1752 (2008).
- 991 78. A. C. Thomas, W. J. Eijgelaar, M. J. A. P. Daemen, A. C. Newby, The pro-fibrotic and anti-  
992 inflammatory foam cell macrophage paradox, *Genomics data* **6**, 136–138 (2015).
- 993 79. D. Kim, B. Langmead, S. L. Salzberg, HISAT: A fast spliced aligner with low memory  
994 requirements, *Nat. Methods* **12**, 357–360 (2015).
- 995 80. S. Anders, P. T. Pyl, W. Huber, HTSeq—a Python framework to work with high-throughput  
996 sequencing data, *Bioinformatics* **31**, 166–169 (2015).
- 997 81. M. I. Love, W. Huber, S. Anders, Moderated estimation of fold change and dispersion for  
998 RNA-seq data with DESeq2, *Genome Biol.* **15**, 1–21 (2014).
- 999 82. G. Yu, L.-G. Wang, Y. Han, Q.-Y. He, clusterProfiler: an R Package for Comparing  
1000 Biological Themes Among Gene Clusters, *Omi. A J. Integr. Biol.* **16**, 284–287 (2012).
- 1001 83. A. Subramanian, P. Tamayo, V. K. Mootha, S. Mukherjee, B. L. Ebert, M. A. Gillette, A.  
1002 Paulovich, S. L. Pomeroy, T. R. Golub, E. S. Lander, J. P. Mesirov, Gene set enrichment  
1003 analysis: A knowledge-based approach for interpreting genome-wide expression profiles, *Proc.*  
1004 *Natl. Acad. Sci.* **102**, 15545 LP – 15550 (2005).
- 1005 84. N. Das, L. Xie, S. K. Ramakrishnan, A. Campbell, S. Rivella, Y. M. Shah, Intestine-specific  
1006 Disruption of Hypoxia-inducible Factor (HIF)-2alpha Improves Anemia in Sickle Cell Disease.,  
1007 *J. Biol. Chem.* **290**, 23523–23527 (2015).
- 1008 85. X. Pan, B. Liu, S. Chen, H. Ding, X. Yao, Y. Cheng, D. Xu, Y. Yin, X. Dai, J. Sun, G. Xu, J.  
1009 Pan, L. Xiao, L. Xie, Nr4a1 as a myogenic factor is upregulated in satellite cells/myoblast under  
1010 proliferation and differentiation state., *Biochem. Biophys. Res. Commun.* **513**, 573–581 (2019).

1011 86. S. Chen, H. Ding, X. Yao, L. Xie, Isolation and Culture of Single Myofiber and  
1012 Immunostaining of Satellite Cells from Adult C57BL/6J Mice, *Bio-protocol* **9**, e3313 (2019).

1013

1014 **Acknowledgments:**

1015 **Funding:** This work was support by National Key Research and Development Program of China  
1016 (2017YFD0400301), ‘GDAS’ Project of Science and Technology Development (Grant No.  
1017 2018GDASCX-0806) to Liwei Xie and by National Natural Science Foundation of China (Grant  
1018 No. 81900797) to Liwei Xie, and Guangdong Basic and Applied Basic Research Foundation  
1019 (Grant No.: 2020B1515020046) to Liwei Xie.

1020

1021 **Author Contributions:** LW. X., Y.L. and X. Z. designed the experiment. HR. D., SJ. C., XP.  
1022 Y., and XS. D. developed and optimized the methodology. HR. D., Z. L., XD. M., Y. T., SS. Z.,  
1023 BD. L., GC. C., ZC. Y., XP. Yao, L. Y., XY. C., J. S., H. C., YL. Y., GH. X., HJ. L., WD. W. Z.  
1024 C., and JC. L collected and analyzed the data. GH. P., L. G. and ML. H. raised the experimental  
1025 mice. LW. X acquired the grants and drafted the manuscript. We appreciated Mr Guanshen Liu  
1026 from Biomarker Technologies Corporation for assisting us the RNA sequencing and Ms  
1027 Xiaochen Wang for the figure editing.

1028

1029 **Competing Interests:** These authors declare no conflict of interest.

1030

1031 **Data and materials availability:** RNAseq data are available upon request.

1032

1033

1034

1035

1036



1037

## Figures

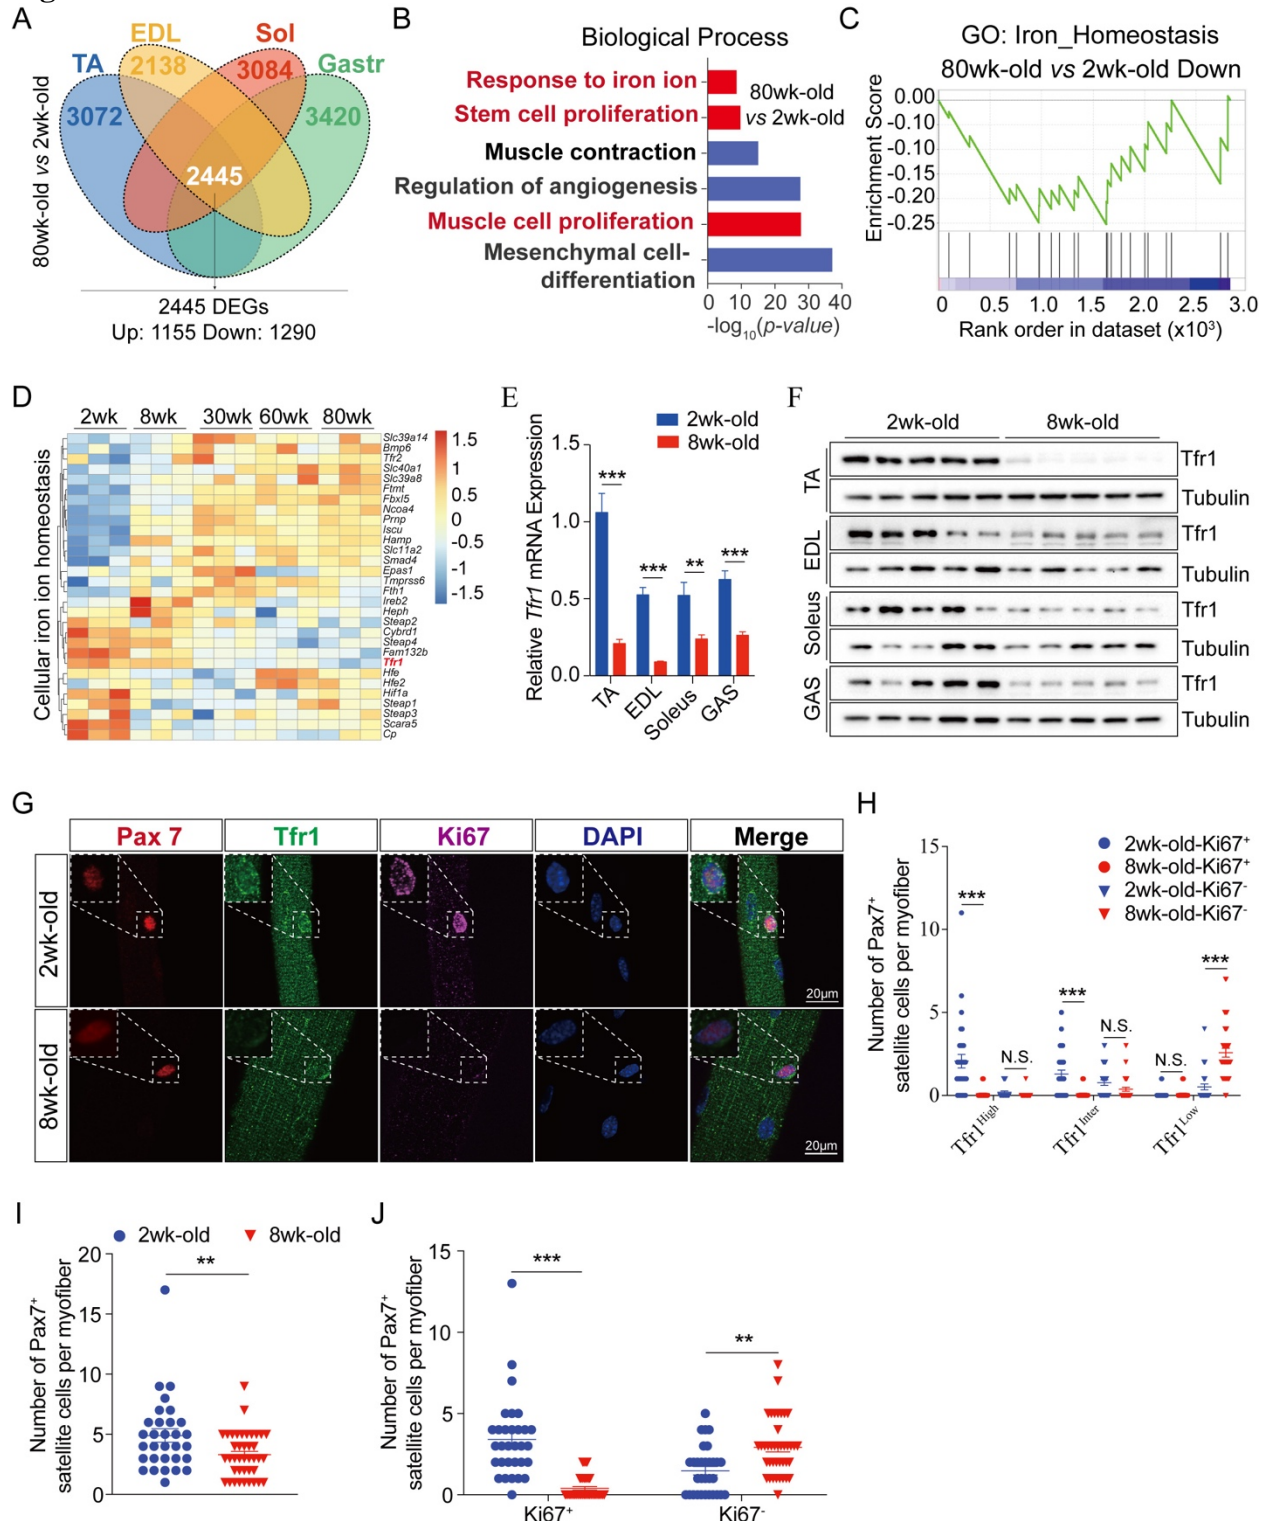

1038

1039

1040

1041

1042

**Figure 1 Identification of *Tfr1* as a key biomarker regarding skeletal muscle ageing and satellite cells activity.** (A) Venn diagram showing overlapped genes between young (2wk-old) and aged (80wk-old) mice among four types of muscle (TA, EDL, Sol and Gas) (n=3/group); (B) Gene ontology (GO: Biological Process) analysis against downregulated genes between 2wk-old

1043 and 80wk-old *C57BL/6J* mice; (C) GSEA analysis of downregulated pathway in response to the  
1044 iron homeostasis; (D) Heatmap of cellular iron homeostasis related gene expression in TA  
1045 muscle across five different aged (2wk-, 8wk-, 30wk-, 60wk- and 80wk-old); (E) qPCR analysis  
1046 of *Tfr1* expression in four types of skeletal muscles (TA, EDL, Sol and Gas) between 2wk-old  
1047 and 8wk-old *C57BL/6J* mice (n=5/group); (F) Representative western blot image of four types  
1048 of skeletal muscles (TA, EDL, Sol and Gas) between 2wk-old and 8wk-old *C57BL/6J* mice  
1049 (n=5/group); (G) Representative images of myofibers isolated from 2wk-old and 8wk-old  
1050 *C57BL/6J* mice (n>50 myofibers from 5 mice/group). Immunofluorescence of Pax7 (red), Tfr1  
1051 (green), Ki67 (pink) and DAPI (blue) staining revealed Tfr1 is highly expressed in SCs at  
1052 proliferative state (Ki67<sup>+</sup>) for 2wk-old mice but not 8wk-old adult mice; (H) Number of Ki67<sup>+</sup>  
1053 and Ki67<sup>-</sup> SCs with different Tfr1 expression level (High, Inter and Low) per myofiber; (I)  
1054 Number of Pax7<sup>+</sup> SCs per myofiber; (J) Number of Ki67<sup>+</sup> and Ki67<sup>-</sup> SCs per myofiber. N.S.: not  
1055 significant, \*\**p*<0.01, \*\*\**p* < 0.005, by 2-sided Student's t-test. Data represent the mean ± SEM  
1056

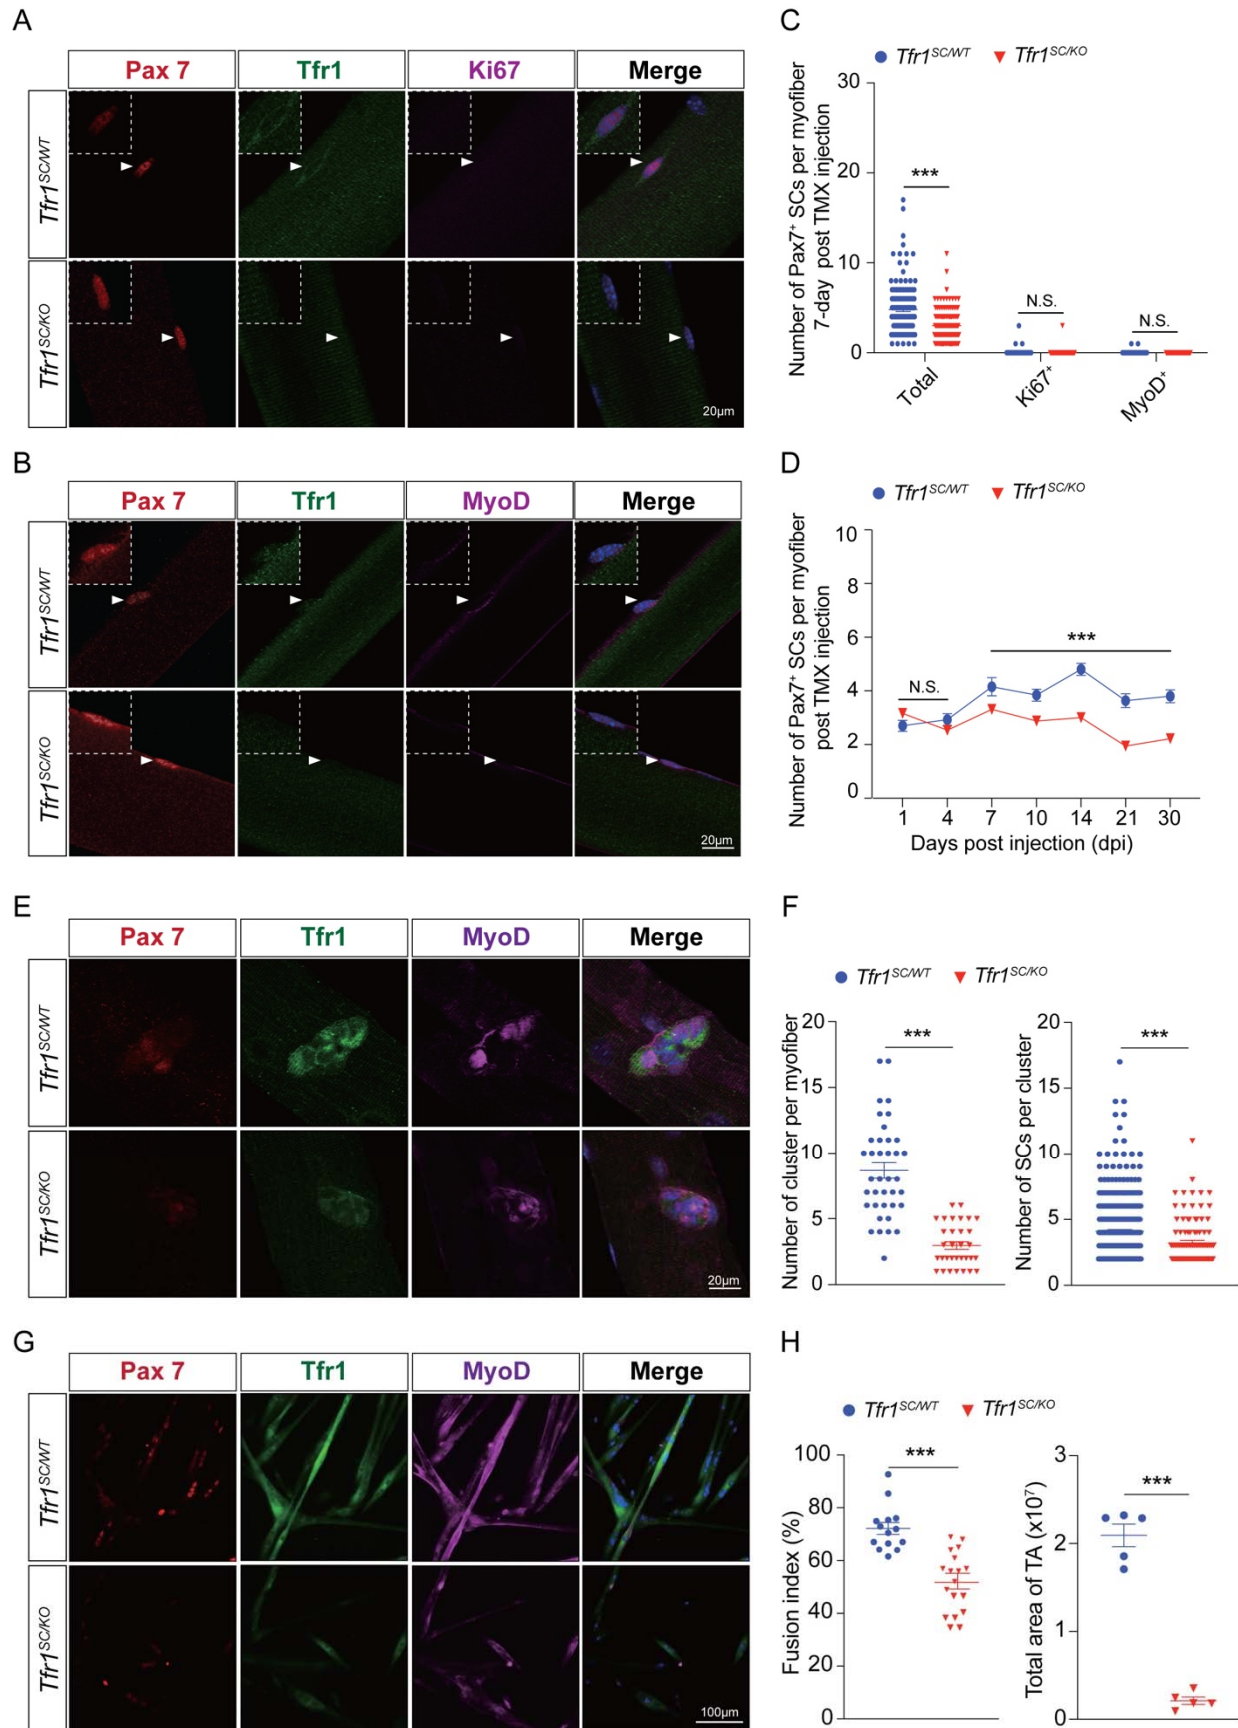

1058 **Figure 2 Genetic deletion of *Tfr1* in quiescent SCs abolishes the activation, proliferation**  
1059 **and differentiation.** (A) Representative images of myofibers isolated from *Tfr1*<sup>SC/WT</sup> and  
1060 *Tfr1*<sup>SC/KO</sup> mice (n>50 myofibers from 5 mice/group). Immunofluorescence of Pax7 (red), Tfr1  
1061 (green), Ki67 (pink) and DAPI (blue) staining; (B) Representative images of myofibers isolated  
1062 from *Tfr1*<sup>SC/WT</sup> and *Tfr1*<sup>SC/KO</sup> mice (n>50 myofibers from 5 mice/group). Immunofluorescence of  
1063 Pax7 (red), Tfr1 (green), MyoD (pink) and DAPI (blue) staining; (C) Number of total, Ki67<sup>+</sup> and  
1064 MyoD<sup>+</sup> SCs per myofiber between *Tfr1*<sup>SC/WT</sup> and *Tfr1*<sup>SC/KO</sup> mice; (D) Both *Tfr1*<sup>SC/WT</sup> and *Tfr1*<sup>SC/KO</sup>  
1065 mice were administrated with tamoxifen on the same day. Number of Pax7<sup>+</sup> SCs per myofiber  
1066 was calculated at 1-, 4-, 7-, 10-, 14-, 21- and 30-day post tamoxifen-induced *Tfr1* deletion (n = 5  
1067 mice/group/time point); (E) Representative images of SC clusters on myofiber from *Tfr1*<sup>SC/WT</sup>  
1068 and *Tfr1*<sup>SC/KO</sup> mice *ex vivo* cultured for 72 hrs (n>50 myofiber). Immunofluorescence of Pax7  
1069 (red), Tfr1 (green), MyoD (pink) and DAPI (blue) staining (n >20 myofibers from 7  
1070 mice/group); (F) Number of SC clusters per myofiber and number of Pax7<sup>+</sup> SC per cluster (n>50  
1071 myofibers from 5 mice/group); (G) Representative images of differentiated myotubes from SCs  
1072 on myofiber isolated from *Tfr1*<sup>SC/WT</sup> and *Tfr1*<sup>SC/KO</sup> mice (n>10 myofibers from 5 mice/group); (H)  
1073 Summary of fusion index of SCs on myofiber differentiated in DMEM supplemented with 2%  
1074 horse serum (n>10 myofibers from 5 mice/group). N.S.: not significant, \*\*\*P < 0.005, by 2-  
1075 sided Student's t-test. Data represent the mean ± SEM.  
1076



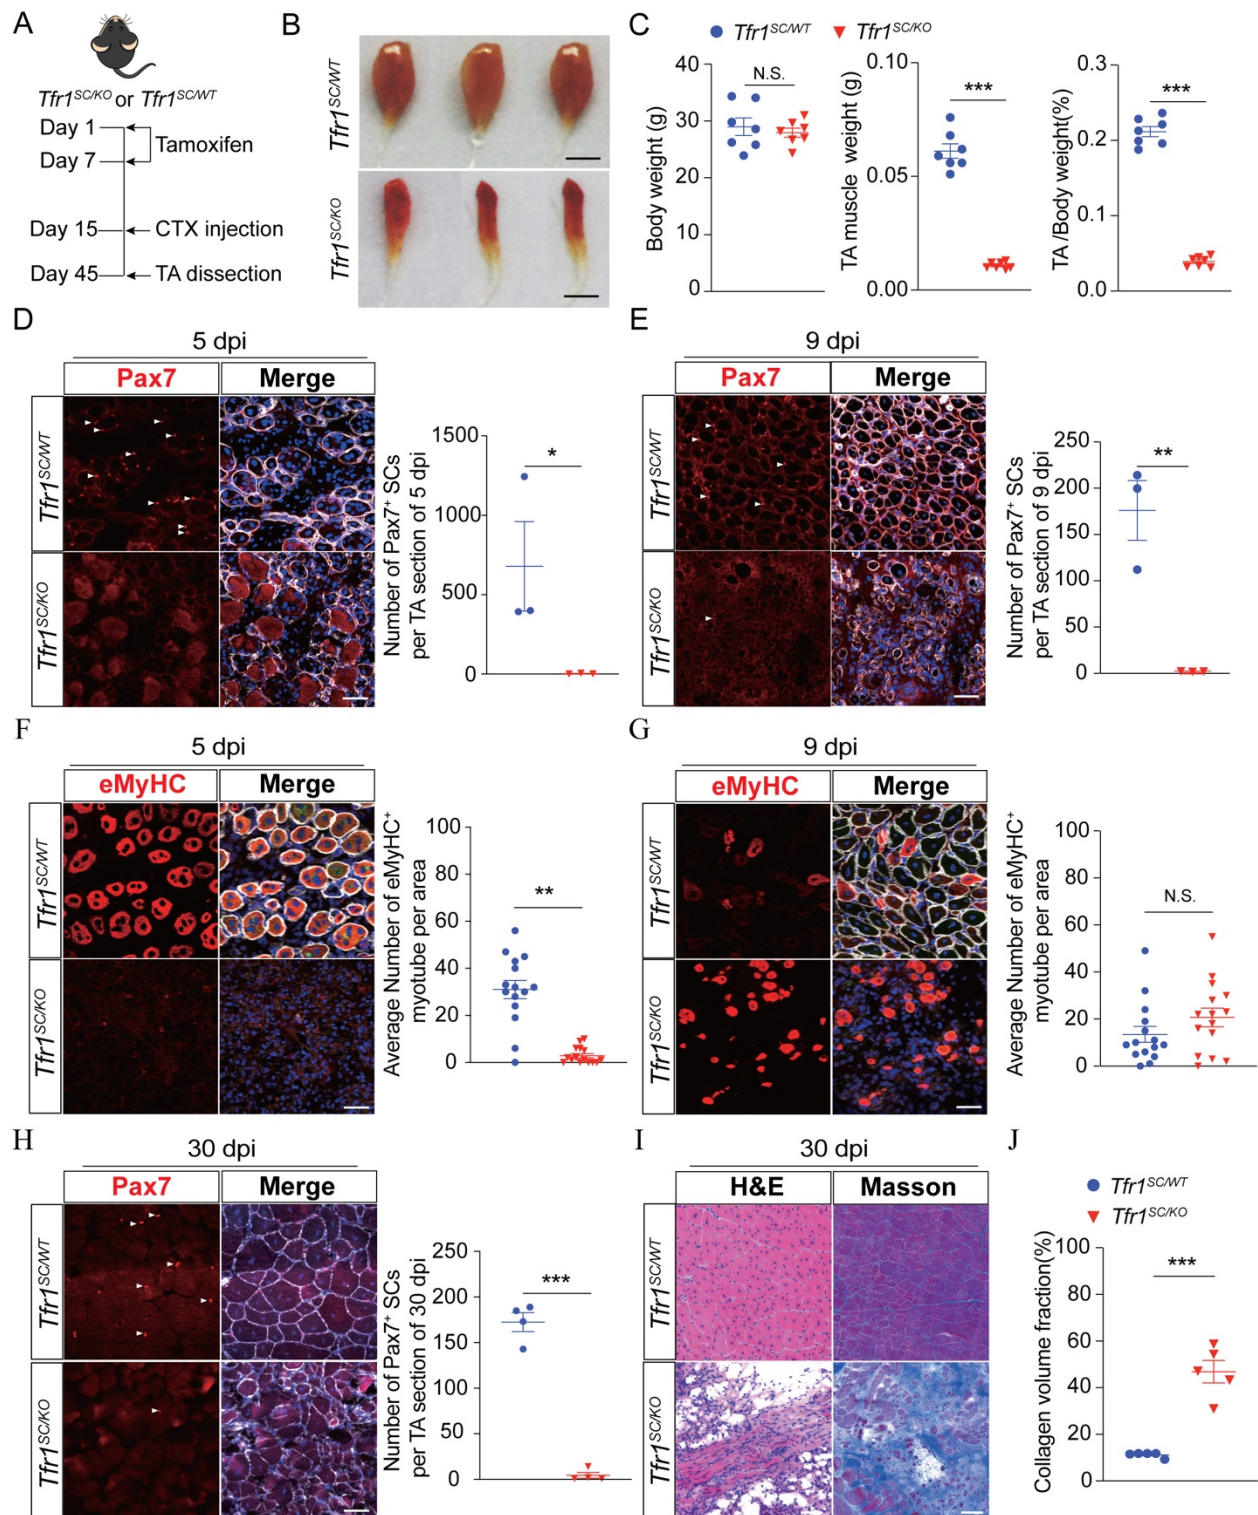

1077  
1078  
1079  
1080  
1081  
1082

**Figure 3** *Tfr1*-ablation in SCs blocks skeletal muscle regeneration. (A) Timeline characterizing skeletal muscle regeneration upon tamoxifen-induced *Tfr1*-ablation in SCs; (B) Representative image of TA upon completion of regeneration between *Tfr1<sup>SC/WT</sup>* and *Tfr1<sup>SC/KO</sup>* mice at 30 dpi; (C) Summary of body weight, TA weight and ratio of TA and body weight between *Tfr1<sup>SC/WT</sup>* and *Tfr1<sup>SC/KO</sup>* mice upon completion of regeneration at 30 dpi (n=7/group); (D)

1083 Representative images of TA section from *Tfr1*<sup>SC/WT</sup> and *Tfr1*<sup>SC/KO</sup> mice (n=3 mice/group).  
1084 Immunofluorescence of Pax7 revealed a decrease in the number of Pax7<sup>+</sup> SCs (arrowheads) and  
1085 number of Pax7<sup>+</sup> SCs per TA muscle section at 5 dpi (right of immunostaining images); (E)  
1086 Representative images of TA section from *Tfr1*<sup>SC/WT</sup> and *Tfr1*<sup>SC/KO</sup> mice (n=3 mice/group).  
1087 Immunofluorescence of Pax7 revealed a decrease in the number of Pax7<sup>+</sup> SCs (arrowheads) and  
1088 number of Pax7<sup>+</sup> SCs per TA muscle section at 9 dpi (right of immunostaining images); (F)  
1089 Immunofluorescence of eMyHC<sup>+</sup> myotubes after CTX injury (5 dpi) and number of eMyHC<sup>+</sup>  
1090 myotubes per TA section area at 5 dpi (right of immunostaining images); (G)  
1091 Immunofluorescence of eMyHC<sup>+</sup> myotubes after CTX injury (5 dpi) and number of eMyHC<sup>+</sup>  
1092 myotubes per TA section area at 9 dpi (right of immunostaining images); (H)  
1093 Immunofluorescence of Pax7 revealed a decrease in the number of Pax7<sup>+</sup> SCs (arrowheads) and  
1094 number of Pax7<sup>+</sup> SCs per TA muscle section at 30 dpi (right of immunostaining images , n=4  
1095 mice/group); (I) Representative images of TA muscles from *Tfr1*<sup>SC/WT</sup> and *Tfr1*<sup>SC/KO</sup> mice with  
1096 H.E. and Masson staining upon completion of CTX-induced regeneration (30 dpi, n=6  
1097 mice/group); (J) Summary of collagen volume fraction between *Tfr1*<sup>SC/WT</sup> and *Tfr1*<sup>SC/KO</sup> mice  
1098 completion of CTX-induced regeneration at 30 dpi. N.S.: not significant, \*P < 0.05, \*\*P < 0.01,  
1099 \*\*\*P < 0.005, by 2-sided Student's t-test. Data represent the mean ± SEM.  
1100  
1101



1102

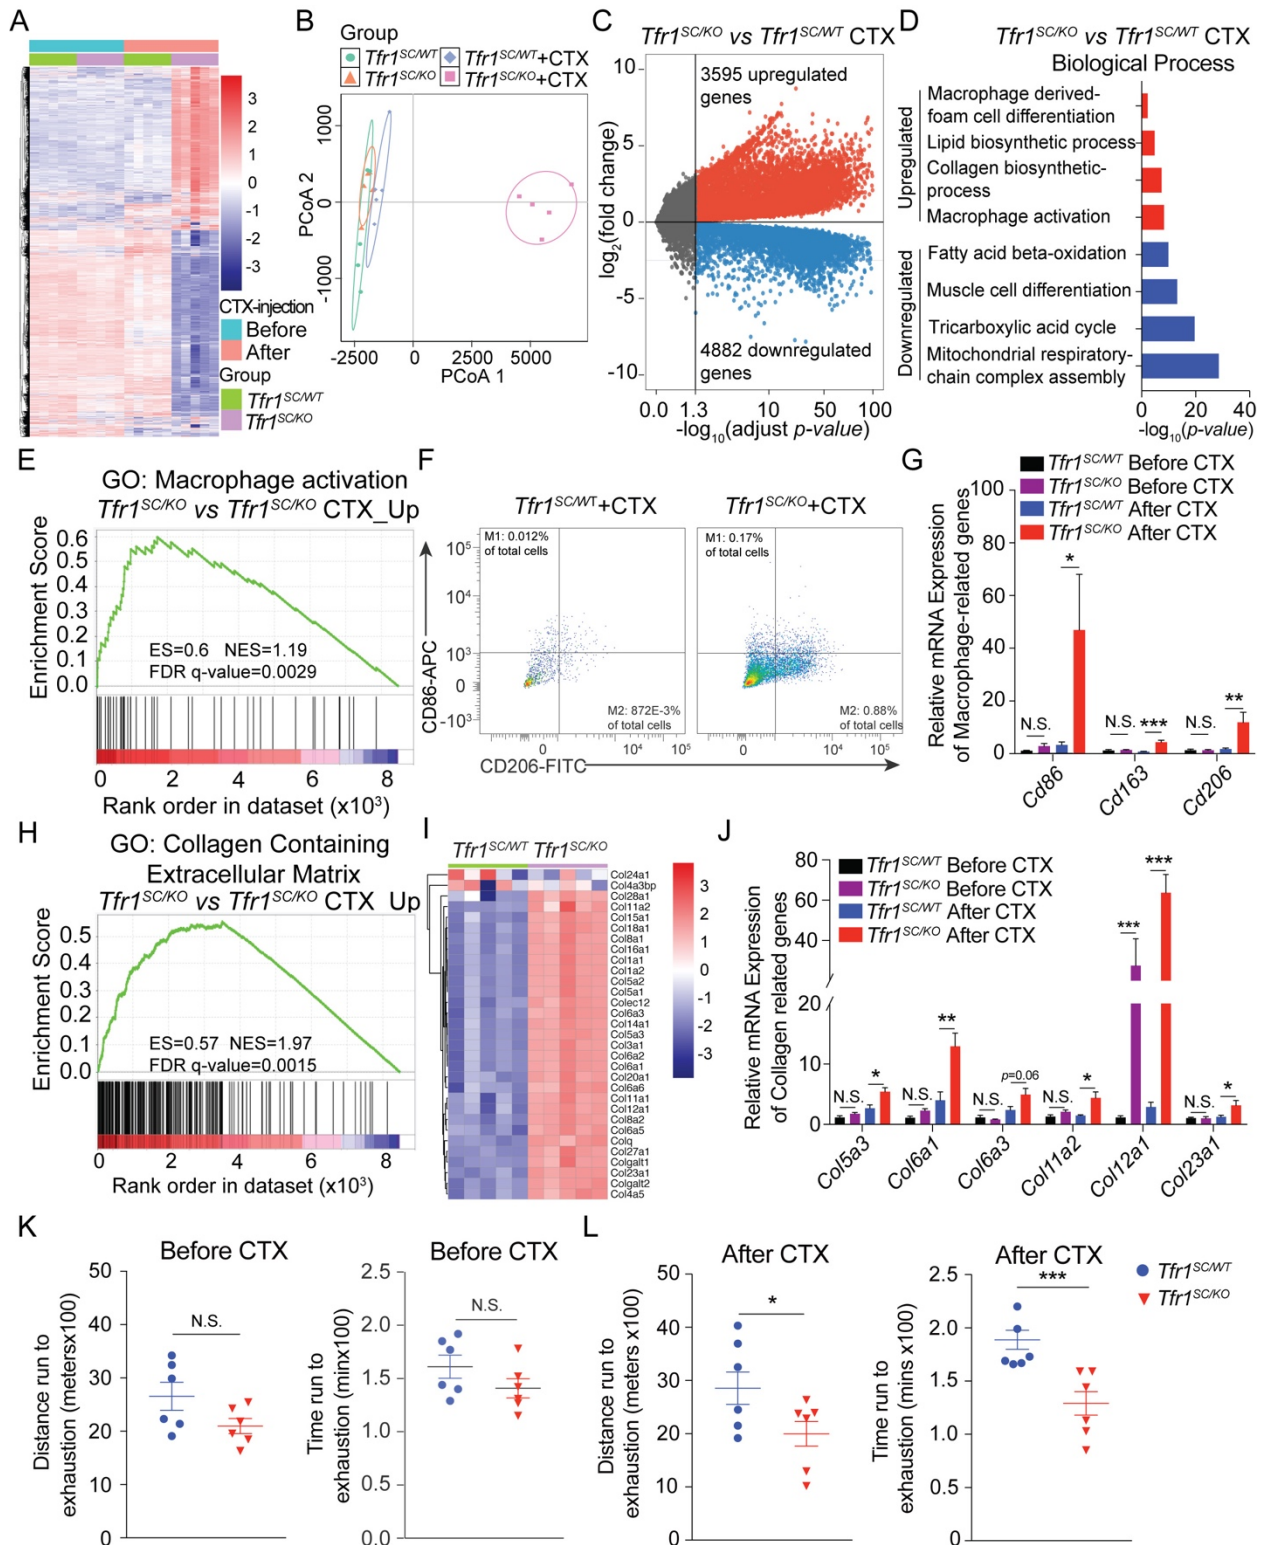

1103

1104

1105

1106

**Figure 4** SCs-*Tfr1* deletion in TA of *Tfr1<sup>SC/KO</sup>* mice results in skeletal muscle dysfunction. (A) Heatmap of mRNA expression profile in TA muscle from adult *Tfr1<sup>SC/WT</sup>* and *Tfr1<sup>SC/KO</sup>* mice before or after CTX-induced regeneration at 30 dpi (n=5/group); (B) PCoA of transcriptome

1107 from TA muscle in adult *Tfr1*<sup>SC/WT</sup> and *Tfr1*<sup>SC/KO</sup> mice before or after CTX-induced regeneration  
1108 (n=5/group); (C) Volcano plot of differentially expressed genes in TA muscle from adult  
1109 *Tfr1*<sup>SC/WT</sup> and *Tfr1*<sup>SC/KO</sup> mice after CTX-induced regeneration; (D) GO (Biological Process)  
1110 analysis of DEGs for both upregulated and downregulated genes; (E) GSEA analysis of  
1111 macrophage activation pathway between *Tfr1*<sup>SC/WT</sup> and *Tfr1*<sup>SC/KO</sup> mice upon CTX-induced  
1112 regeneration at 30 dpi; (F) Flow cytometry analysis of the percentage of the CD206<sup>+</sup>/CD86<sup>+</sup>  
1113 macrophage in total cells obtained from TA of *Tfr1*<sup>SC/WT</sup> and *Tfr1*<sup>SC/KO</sup> mice after CTX-induced  
1114 injury at 30 dpi ; (G) qPCR analysis of *Cd86*, *Cd163* and *Cd206* mRNA expression in TA  
1115 muscle from adult *Tfr1*<sup>SC/WT</sup> and *Tfr1*<sup>SC/KO</sup> mice before or after CTX-induced injury (n=5/group);  
1116 (H) GSEA analysis of collagen containing extracellular matrix pathway between *Tfr1*<sup>SC/WT</sup> and  
1117 *Tfr1*<sup>SC/KO</sup> mice upon CTX-induced regeneration at 30 dpi; (I) Heatmap for collagen matrix  
1118 related gene expression profile between *Tfr1*<sup>SC/WT</sup> and *Tfr1*<sup>SC/KO</sup> mice after CTX-induced injury at  
1119 30 dpi (n=5); (J) qPCR analysis of *Col5a3*, *Col6a1*, *Col6a3*, *Col11a2*, *Col12a1*, and *Col23a1*  
1120 mRNA expression in TA muscle from adult *Tfr1*<sup>SC/WT</sup> and *Tfr1*<sup>SC/KO</sup> mice before or after CTX-  
1121 induced injury at 30 dpi (n=5/group); (K-L) Tread mill running distance and running time to  
1122 exhaustion for *Tfr1*<sup>SC/WT</sup> and *Tfr1*<sup>SC/KO</sup> mice before and after regeneration at 30 dpi. N.S.: not  
1123 significant, \*P < 0.05, \*\*P < 0.01, \*\*\*P < 0.005, by 2-sided Student's t-test. Data represent the  
1124 mean ± SEM.  
1125

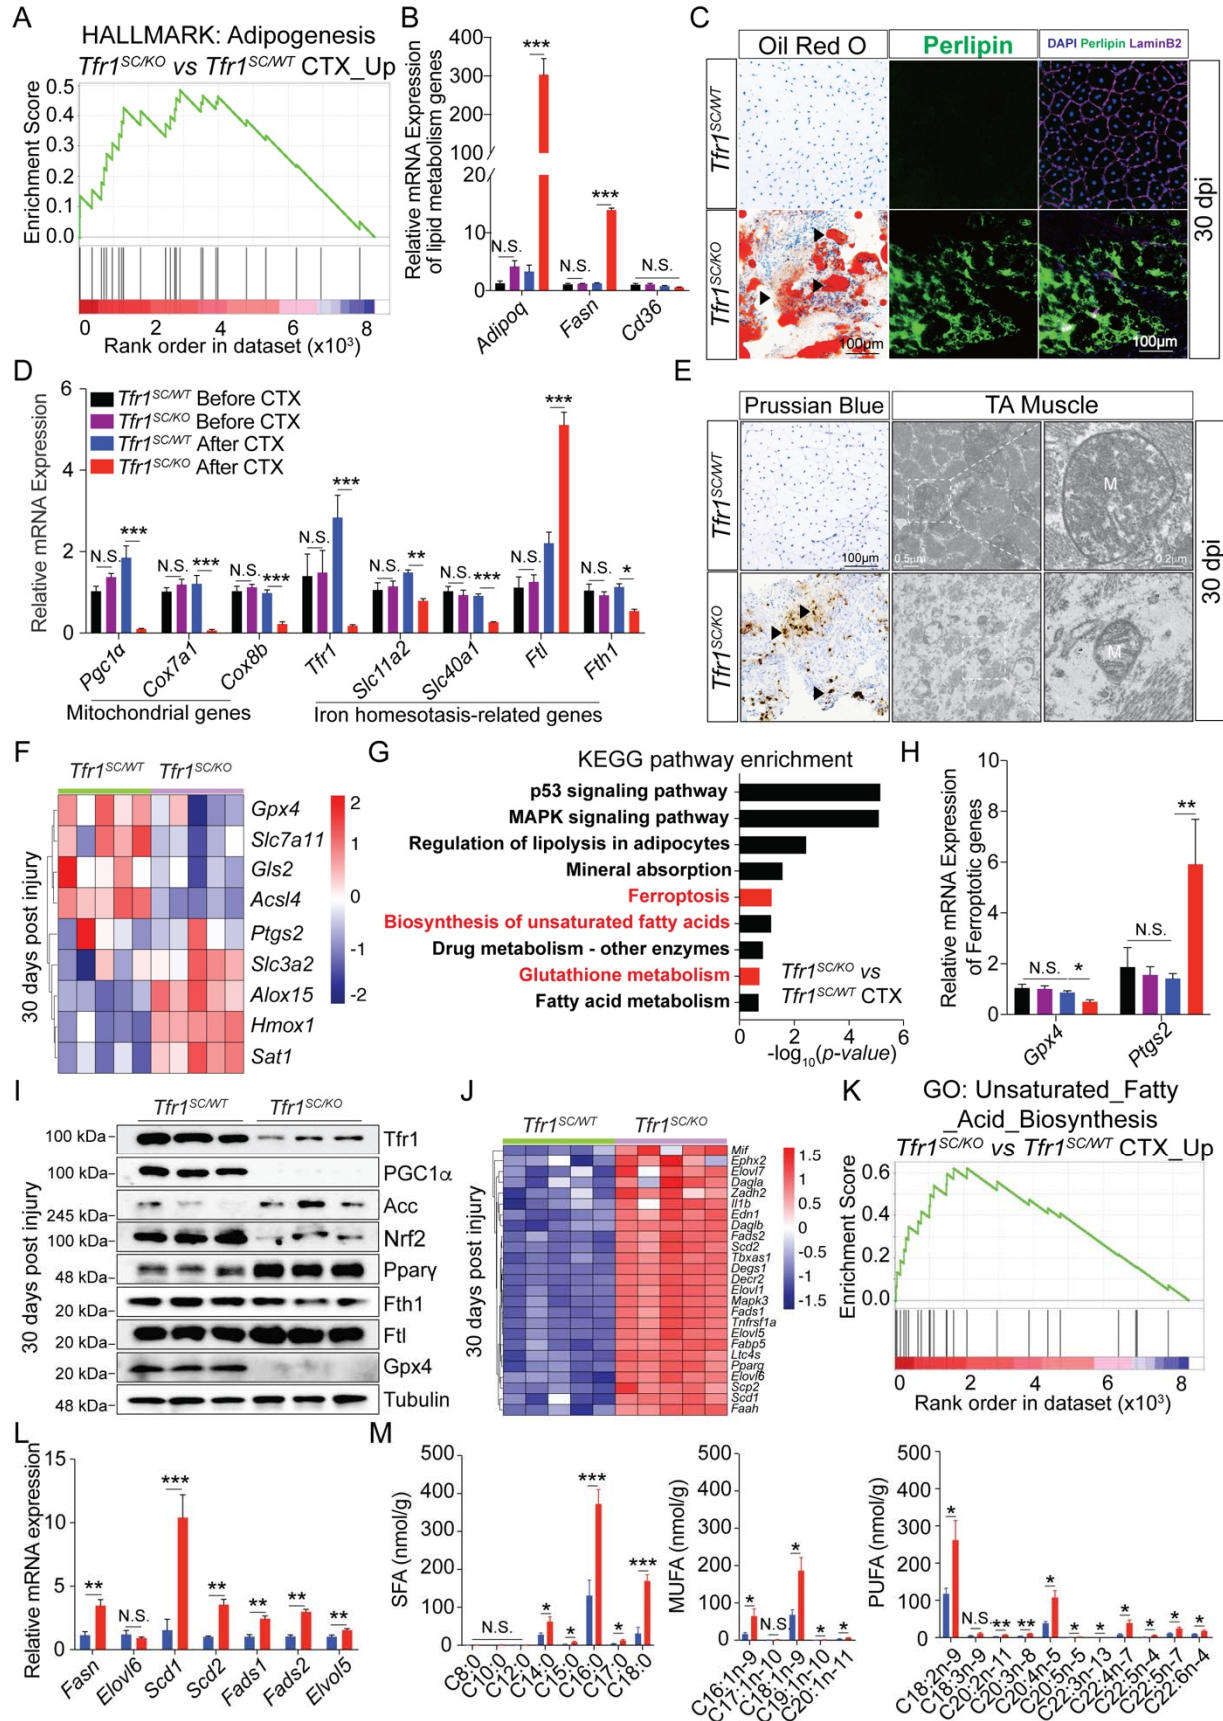

1127 **Figure 5 Dysregulation of lipid and iron metabolism activates ferroptosis in injured TA of**  
1128 ***Tfr1*<sup>SC/KO</sup> mice.** (A) GSEA analysis of adipogenesis pathway between *Tfr1*<sup>SC/WT</sup> and *Tfr1*<sup>SC/KO</sup>  
1129 mice upon CTX-induced regeneration at 30 dpi; (B) qPCR analysis of *Adipoq*, *Fasn* and *Cd36*  
1130 mRNA expression in TA muscle from adult *Tfr1*<sup>SC/WT</sup> and *Tfr1*<sup>SC/KO</sup> mice before or after CTX-  
1131 induced injury (n=5/group); (C) Representative images of TA sections from *Tfr1*<sup>SC/WT</sup> and  
1132 *Tfr1*<sup>SC/KO</sup> mice upon CTX-induced injury at 30 dpi (n=5/group). Oil Red O (ORO) staining and  
1133 perilipin (green) and Laminin B2 (pink) immunofluorescent staining revealed adipogenesis and  
1134 lipid accumulation in TA of *Tfr1*<sup>SC/KO</sup> mic; (D) qPCR analysis of *Pgc1α*, *Cox7a1*, and *Cox8b*  
1135 (mitochondrial genes), *Tfr1*, *Slc11a2*, *Slc40a1*, *Ftl* and *Fth1* (iron homeostasis related genes)  
1136 mRNA expression in TA muscle from adult *Tfr1*<sup>SC/WT</sup> and *Tfr1*<sup>SC/KO</sup> mice before or after CTX-  
1137 induced injury (n=5/group); (E) Representative images of TA section with Prussian Blue staining  
1138 (n=5/group) and transmission electron microscope images for TA section from adult *Tfr1*<sup>SC/WT</sup>  
1139 and *Tfr1*<sup>SC/KO</sup> mice after CTX-induced injury at 30 dpi; (F) Heatmap of ferroptosis-related gene  
1140 expression in TA from adult *Tfr1*<sup>SC/WT</sup> and *Tfr1*<sup>SC/KO</sup> mice after CTX-induced injury at 30 dpi  
1141 (n=5/group); (G) KEGG pathway enrichment analysis of upregulated genes in TA from adult  
1142 *Tfr1*<sup>SC/WT</sup> and *Tfr1*<sup>SC/KO</sup> mice after CTX-induced injury at 30 dpi; (H) qPCR analysis of *Gpx4* and  
1143 *Ptgs2* expression in TA of adult *Tfr1*<sup>SC/WT</sup> and *Tfr1*<sup>SC/KO</sup> mice before or after CTX-induced injury  
1144 (n=5/group); (I) Representative western blot images of TA muscle between *Tfr1*<sup>SC/WT</sup> and  
1145 *Tfr1*<sup>SC/KO</sup> mice after CTX-induced injury at 30 dpi; (J) Heatmap of unsaturated fatty acid  
1146 biosynthesis-related gene expression in TA from adult *Tfr1*<sup>SC/WT</sup> and *Tfr1*<sup>SC/KO</sup> mice after CTX-  
1147 induced injury at 30 dpi (n=5/group); (K) GSEA analysis of unsaturated fatty acid biosynthesis  
1148 pathway between *Tfr1*<sup>SC/WT</sup> and *Tfr1*<sup>SC/KO</sup> mice upon CTX-induced regeneration at 30 dpi; (L)  
1149 qPCR analysis of *Fasn*, *Elvol5*, *Elvol6*, *Scd1*, *Fads1* and, *Fads2* expression in TA of adult  
1150 *Tfr1*<sup>SC/WT</sup> and *Tfr1*<sup>SC/KO</sup> mice after CTX-induced injury at 30 dpi (n=5/group); (M) SFU, MUFA  
1151 and PUFA level (nmol/g) in TA of adult *Tfr1*<sup>SC/WT</sup> and *Tfr1*<sup>SC/KO</sup> mice after CTX-induced injury  
1152 at 30 dpi (n=4/group). N.S.: not significant, \*P < 0.05, \*\*P < 0.01, \*\*\*P < 0.005, by 2-sided  
1153 Student's t-test. Data represent the mean ± SEM.  
1154



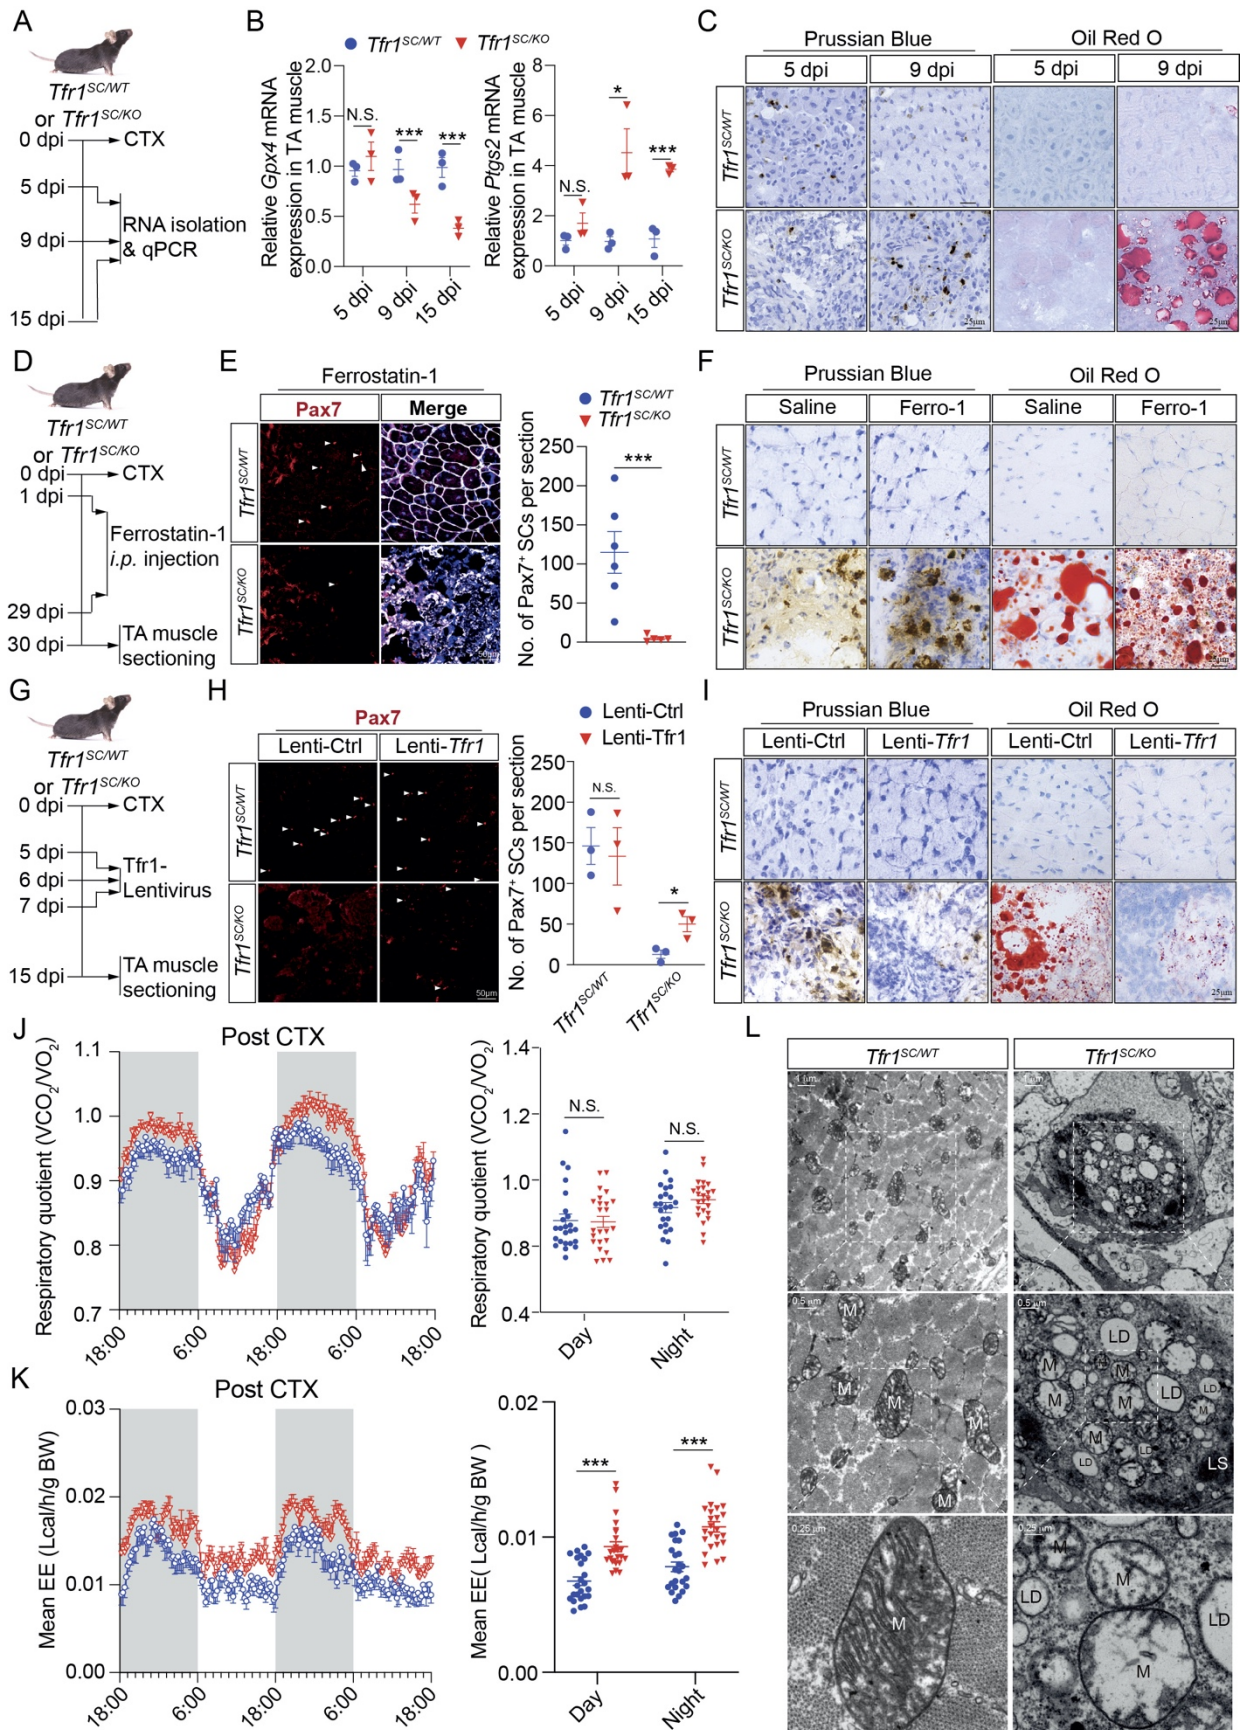

1156 **Figure 6 Ferroptosis in TA of *Tfr1*<sup>SC/KO</sup> mice prevents skeletal muscle regeneration.** (A)  
1157 Timeline characterizing the activation of ferroptosis in TA muscle of *Tfr1*<sup>SC/WT</sup> and *Tfr1*<sup>SC/KO</sup>  
1158 mice after CTX-induced injury; (B) qPCR analysis of *Gpx4* and *Ptgs2* expression in TA from  
1159 adult *Tfr1*<sup>SC/WT</sup> and *Tfr1*<sup>SC/KO</sup> mice after CTX-induced injury at 5, 9 and 15 dpi; (C)  
1160 Representative images of TA section with Prussian Blue and ORO staining from *Tfr1*<sup>SC/WT</sup> and  
1161 *Tfr1*<sup>SC/KO</sup> mice after CTX-induced injury at 5 and 9 dpi; (D) Timeline characterizing the effect of  
1162 Ferrostatin-1 to inhibit ferroptosis in TA muscle from *Tfr1*<sup>SC/WT</sup> and *Tfr1*<sup>SC/KO</sup> mice; (E)  
1163 Representative images of TA section immunostaining for Pax7 (red) and Laminin B2 (white).  
1164 Number of Pax7<sup>+</sup> SCs per section (right); (F) Representative images of TA section with Prussian  
1165 Blue and ORO staining from adult *Tfr1*<sup>SC/WT</sup> and *Tfr1*<sup>SC/KO</sup> mice after CTX-induced injury  
1166 between saline and Ferrostatin-1 *i.p.* injection at 30 dpi; (G) Timeline characterizing the effect of  
1167 lenti-Tfr1 to inhibit ferroptosis in TA muscle from *Tfr1*<sup>SC/WT</sup> and *Tfr1*<sup>SC/KO</sup> mice; (H)  
1168 Representative images of TA section immunostaining for Pax7 (red) and Laminin B2 (white)  
1169 between lenti-Ctrl and lenti-Tfr1 intramuscular injection at 30 dpi. Number of Pax7<sup>+</sup> SCs per  
1170 section (right); (I) Representative images of TA section with Prussian Blue and ORO staining  
1171 from adult *Tfr1*<sup>SC/WT</sup> and *Tfr1*<sup>SC/KO</sup> mice after CTX-induced injury between lenti-Ctrl and lenti-  
1172 Tfr1 intramuscular injection at 15 dpi; (J) Respiratory exchange rate (VCO<sub>2</sub>/VO<sub>2</sub>) and energy  
1173 expenditure were monitored over a 48-h period for *Tfr1*<sup>SC/WT</sup> and *Tfr1*<sup>SC/KO</sup> mice after CTX-  
1174 induced injury at 15 dpi (n = 8 mice/group); (L) Representative transmission electron microscope  
1175 image of TA muscle samples from adult *Tfr1*<sup>SC/WT</sup> and *Tfr1*<sup>SC/KO</sup> mice after CTX-induced injury  
1176 at 30 dpi. N.S.: not significant, \*P < 0.05, \*\*\*P < 0.005, by 2-sided Student's t-test. Data  
1177 represent the mean ± SEM.  
1178  
1179



1180

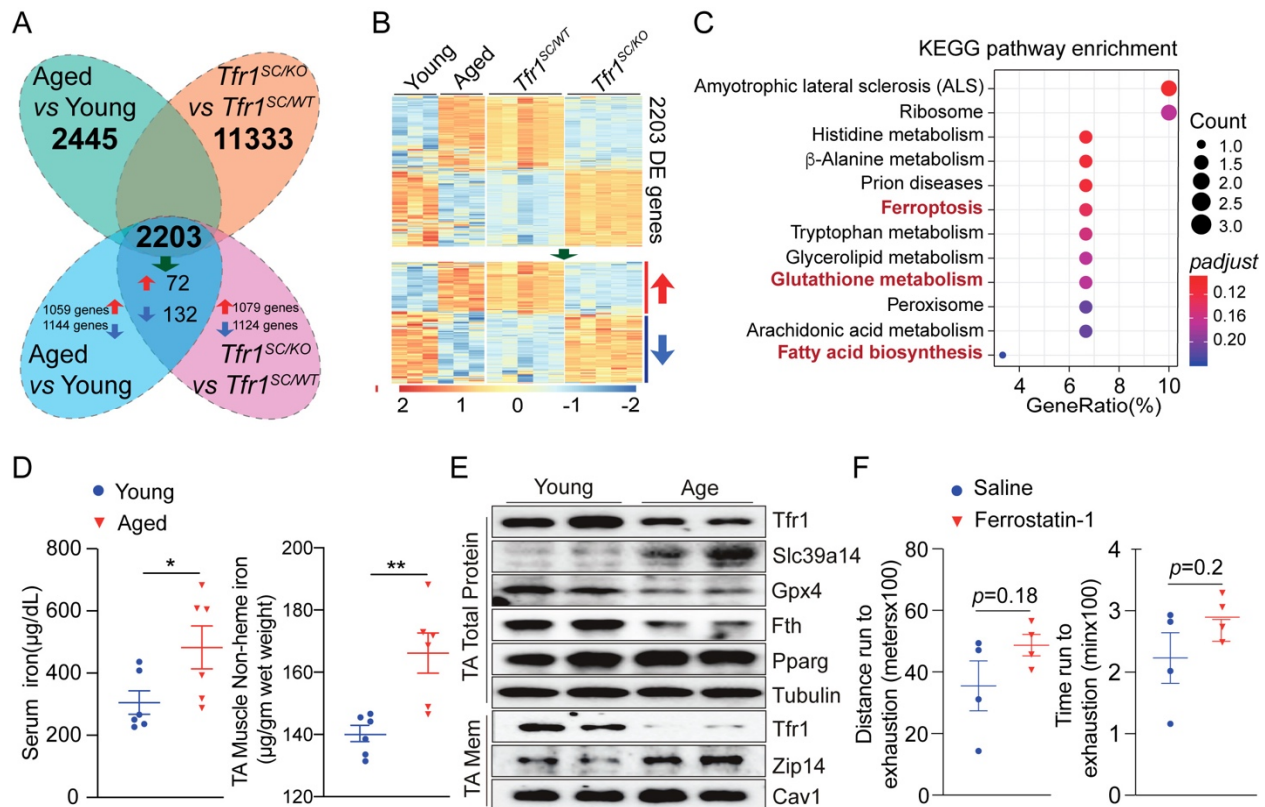

1181

1182

1183 **Figure 7 Slc39a14-mediated iron absorption and labile iron accumulation induces**

1184 **ferroptosis in aged skeletal muscle.** (A) Venn diagram showing the overlapping genes between

1185 Aged/Young and *Tfr1*<sup>SC/WT</sup>/*Tfr1*<sup>SC/KO</sup> samples; (B) Heatmap of overlapping gene expression

1186 profile for Aged/Young group (n=3) and *Tfr1*<sup>SC/WT</sup>/*Tfr1*<sup>SC/KO</sup> group (n=5); (C) KEGG pathway

1187 enrichment analysis of upregulated common genes identified ferroptosis-related genes highly

1188 expressed in TA muscle of aged mice; (D) Serum and total TA muscle non-heme iron from

1189 young (8wk-old) and aged (80wk-old) C57BL/6J mice; (E) Representative western blot image of

1190 total and membrane protein of TA muscle from young (8wk-old) and aged (80wk-old) C57BL/6J

1191 mice; (F) Treadmill running distance and running time to exhaustion for aged (80wk-old)

1192 C57BL/6J mice with CTX-induced injury followed by i.p. injection of either saline or

1193 Ferrostatin-1 for 30 days. .S.: not significant, \*P < 0.05, \*\*P < 0.01, by 2-sided Student's t-test.

1194 Data represent the mean ± SEM.

1195

1196

1196

## Supplementary Materials

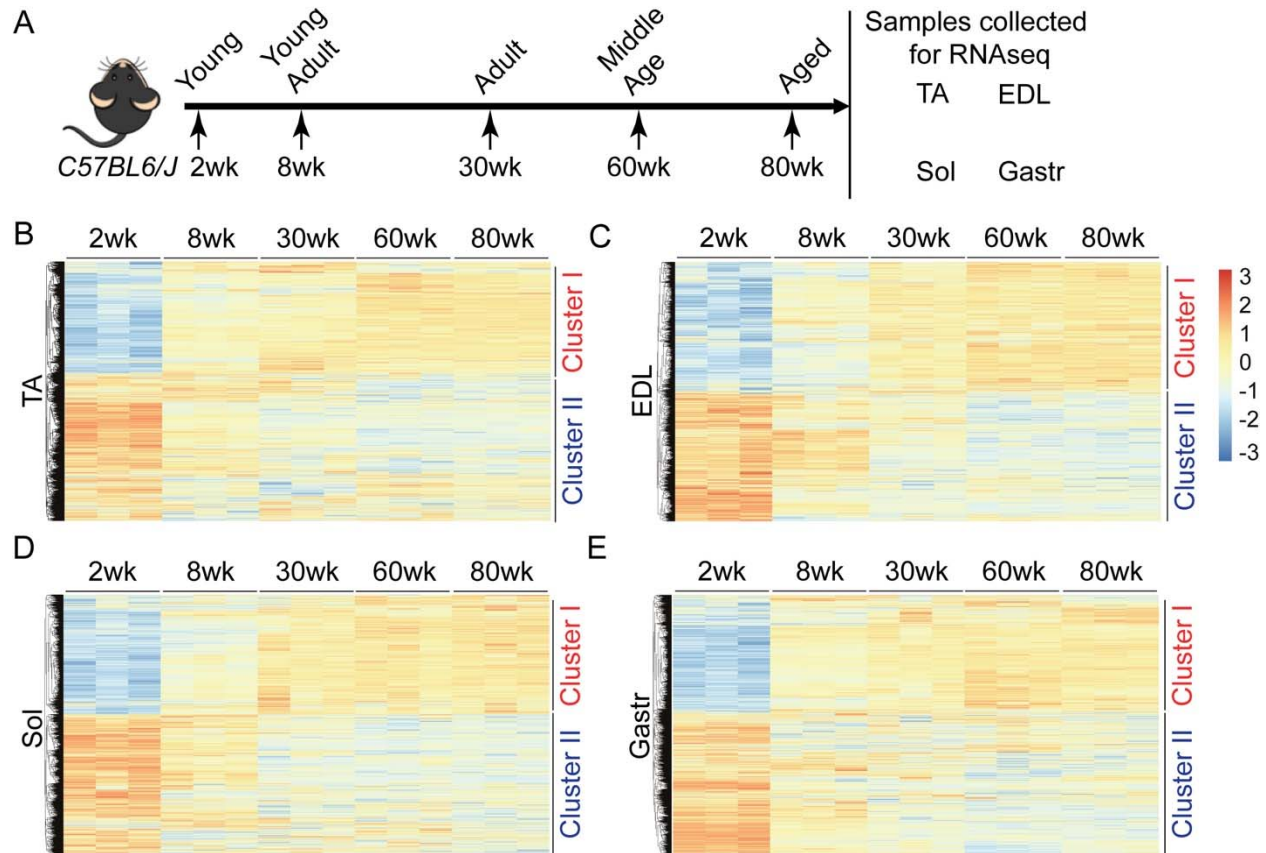

1197

1198

1199

1200

1201

1202

1203

1204

**Figure S1 Related to Figure 1 Gene expression profile in four skeletal muscles (TA, EDL, Sol and Gas) across five different age stages (2wk-, 8wk-, 30wk-, 60wk- and 80wk-old).** (A) Scheme of experimental design; (B) Heatmap of gene expression in TA from *C57BL/6J* mice across five different age-stage (n=3/group); (C) Heatmap of gene expression in EDL from *C57BL/6J* mice across five different age-stage (n=3/group); (D) Heatmap of gene expression in Sol from *C57BL/6J* mice across five different age-stage (n=3/group); (E) Heatmap of gene expression in Gas from *C57BL/6J* mice across five different age-stage (n=3/group).

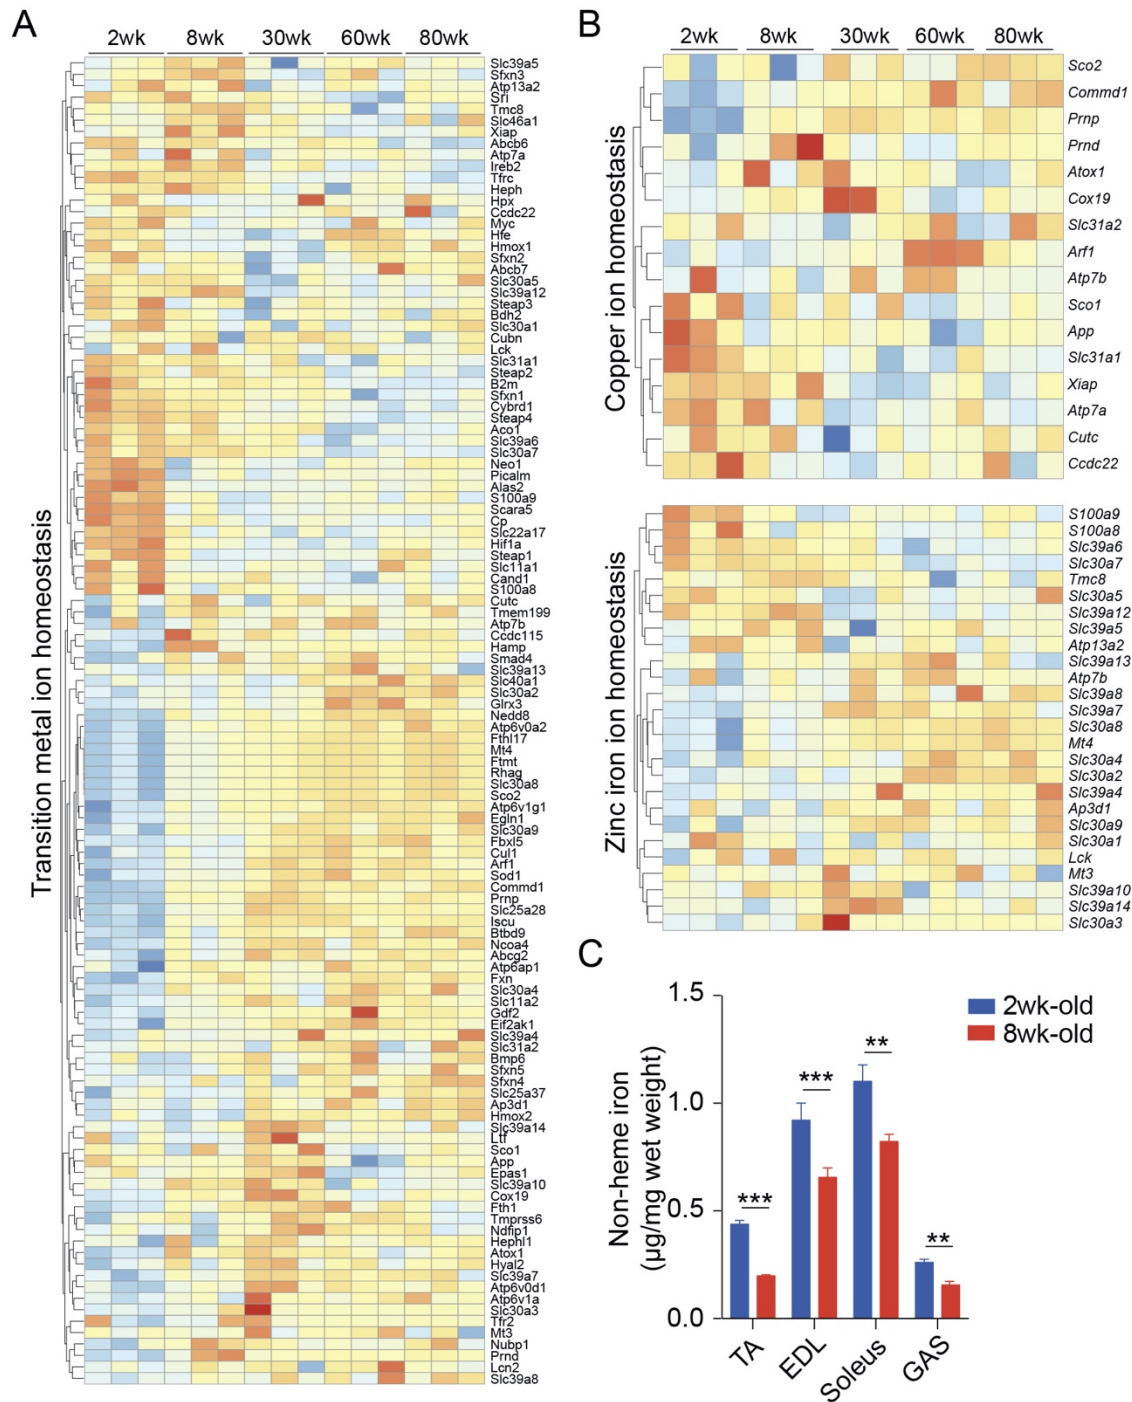

1205  
1206  
1207  
1208  
1209  
1210  
1211  
1212  
1213  
1214

**Figure S2 Related to Figure 1 Gene expression profile in four skeletal muscles (TA, EDL, Sol and Gas) across five different age stages (2wk-, 8wk-, 30wk-, 60wk- and 80wk-old).** (A) Heatmap of transition metal ion homeostasis related gene expression profile in TA muscle across five different age stages (n=3/group); (B) Heatmap of copper and zinc ion homeostasis related gene expression profile in TA muscle across five different age stages (n=3/group); (C) Total non-heme iron levels in four skeletal muscles between 2wk- and 8wk-old *C57BL/6J* mice (n=6/group). N.S.: not significant, \*\*P < 0.01, \*\*\*P < 0.005, by 2-sided Student's t-test. Data represent the mean ± SEM.



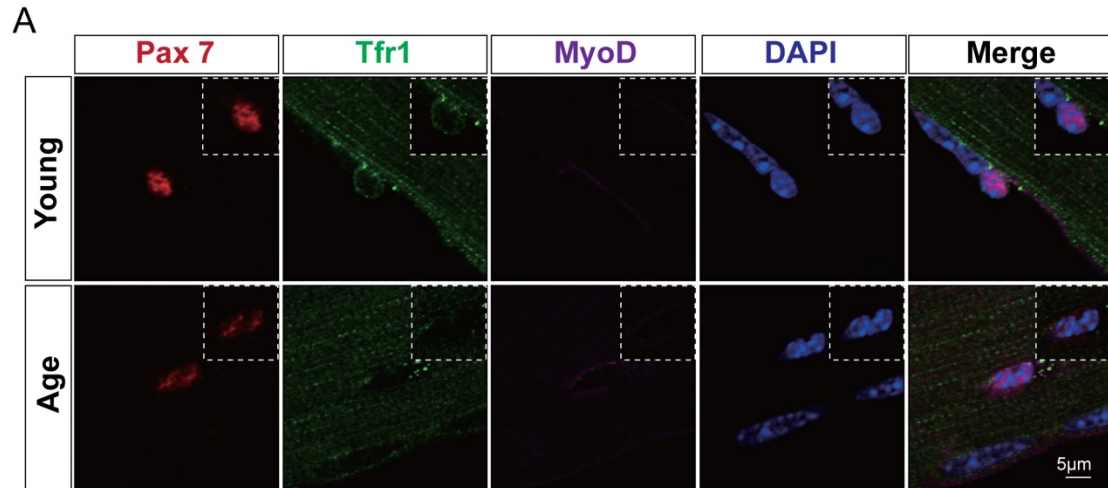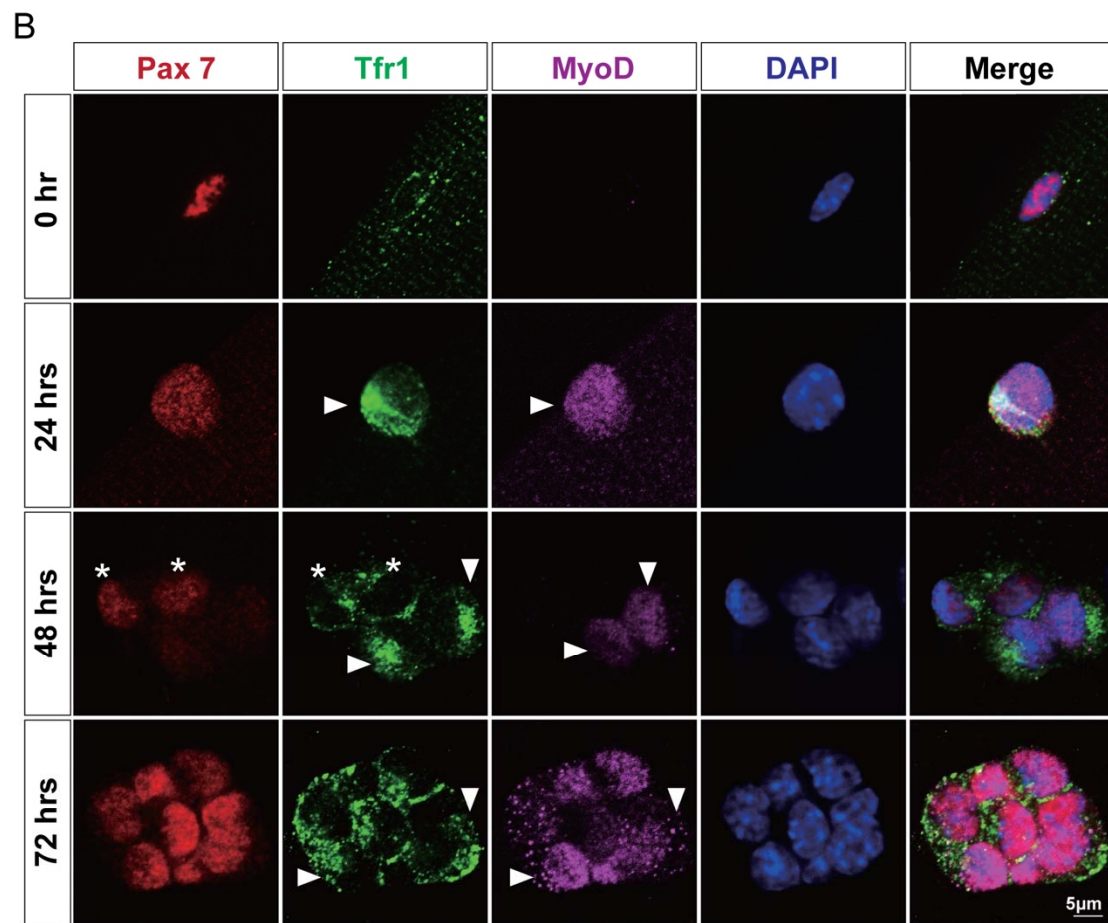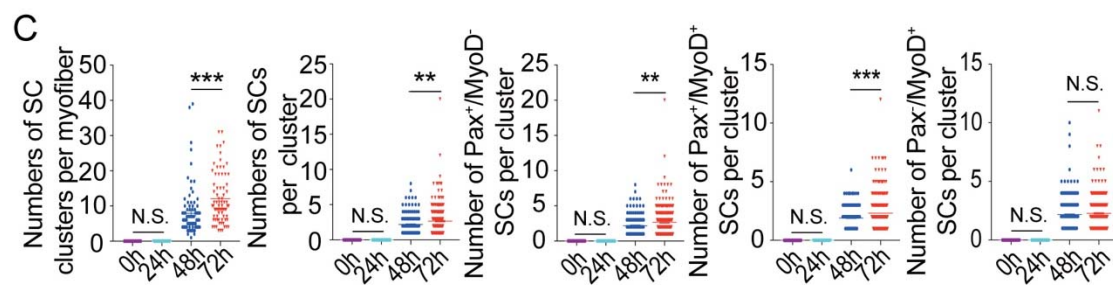

1216 **Figure S3 Related to Figure 1 Tfr1 protein presents in proliferative SCs.** (A) Representative  
1217 images of myofibers from 8wk- and 80wk-old *C57BL/6J* mice (n>50 myofibers from 5  
1218 mice/group). Immunofluorescence of Pax7 (red), Tfr1 (green), MyoD (pink) and DAPI (blue)  
1219 staining revealed Tfr1 protein is lowly expressed in SCs of old *C57BL/6J* mice; (B)  
1220 Representative images of SCs cluster on single myofiber from adult *C57BL/6J* mice culture for  
1221 different length of time (0, 24, 48 and 72 hrs post single myofiber isolation); (C) Number of SC  
1222 clusters, Pax7<sup>+</sup> SCs per cluster, and Pax7<sup>+</sup>/MyoD<sup>-</sup>, Pax7<sup>+</sup>/MyoD<sup>+</sup>, and Pax7<sup>-</sup>/MyoD<sup>+</sup> SCs per  
1223 SCs cluster (n>50 myofibers). N.S.: not significant, \*\*P < 0.01, \*\*\*P < 0.005, by 2-sided  
1224 Student's t-test. Data represent the mean ± SEM.  
1225  
1226

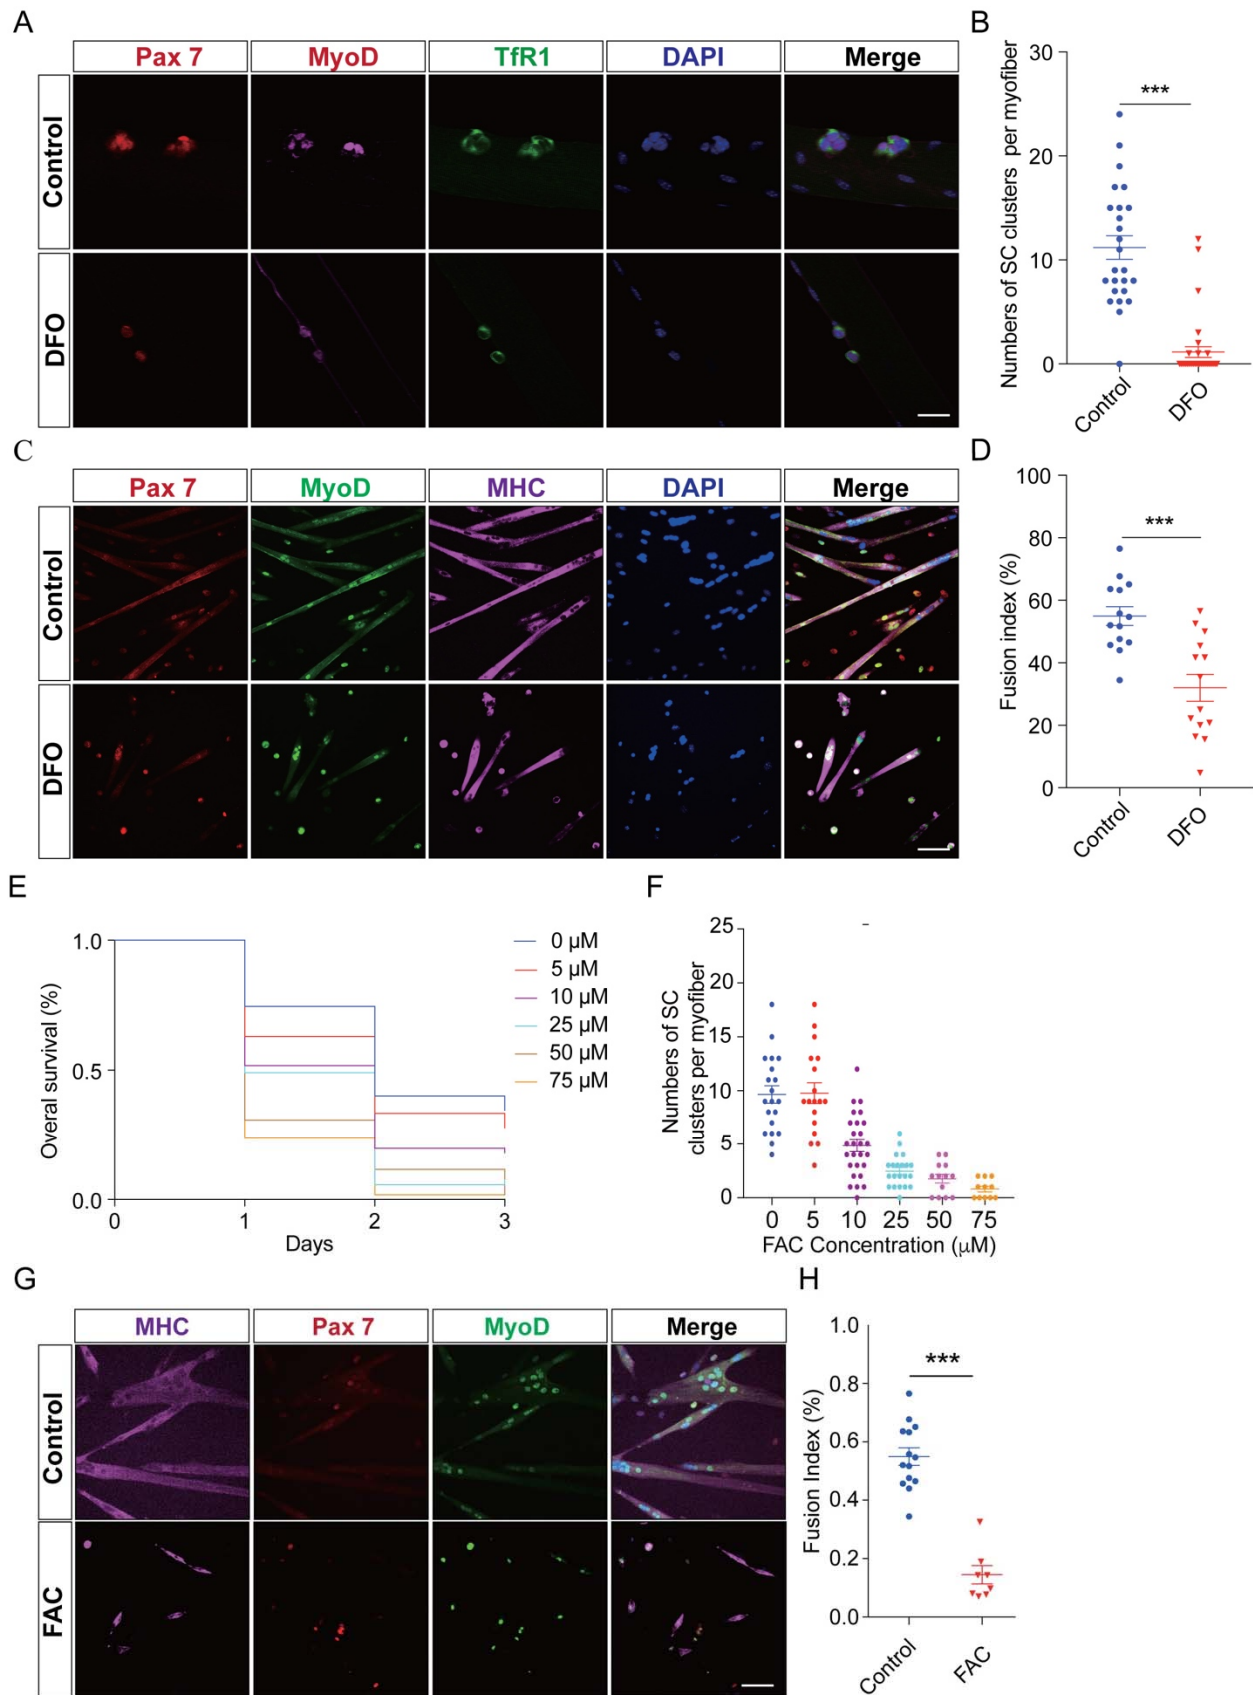



1228 **Figure S4 Related to Figure 1 Dysregulation of iron homeostasis inhibits SCs proliferation**  
1229 **and differentiation.** (A) Representative images of myofibers from adult *C57BL/6J* mice treated  
1230 with DFO (an iron chelator) or vehicle (n>50 myofibers from 5 mice/group).  
1231 Immunofluorescence of Pax7 (red), Tfr1 (green), MyoD (pink) and DAPI (blue) staining  
1232 revealed iron deprivation inhibit SCs proliferation; (B) Number of SC clusters per myofiber; (C)  
1233 Representative images of SCs differentiated into myotube with DFO treatment or vehicle.  
1234 Immunofluorescence of Pax7 (red), MyoD (green), MHC (pink) and DAPI (blue) staining  
1235 revealed iron deprivation inhibits SCs differentiation; (D) Summary of fusion index between  
1236 control and DFO treatment group; (E) Overall survival rate of *ex vivo* cultured myofibers treated  
1237 with different concentration of FAC (0, 5, 10, 25, 50, and 75  $\mu$ m). The number of survived  
1238 myofiber was counted every 24 hrs. (F) Number of SC clusters per myofiber treated with  
1239 different concentration of FAC (0, 5, 10, 25, 50, and 75  $\mu$ m) and cultured for 72 hrs; (G)  
1240 Representative images of SCs differentiated into myotube with FAC treatment (25  $\mu$ m).  
1241 Immunofluorescence of Pax7 (red), MyoD (green), MHC (pink) and DAPI (blue) staining  
1242 revealed FAC treatment at higher concentration inhibits SCs differentiation. N.S.: not significant,  
1243 \*\*\*P < 0.005, by 2-sided Student's t-test. Data represent the mean  $\pm$  SEM.  
1244  
1245

1246

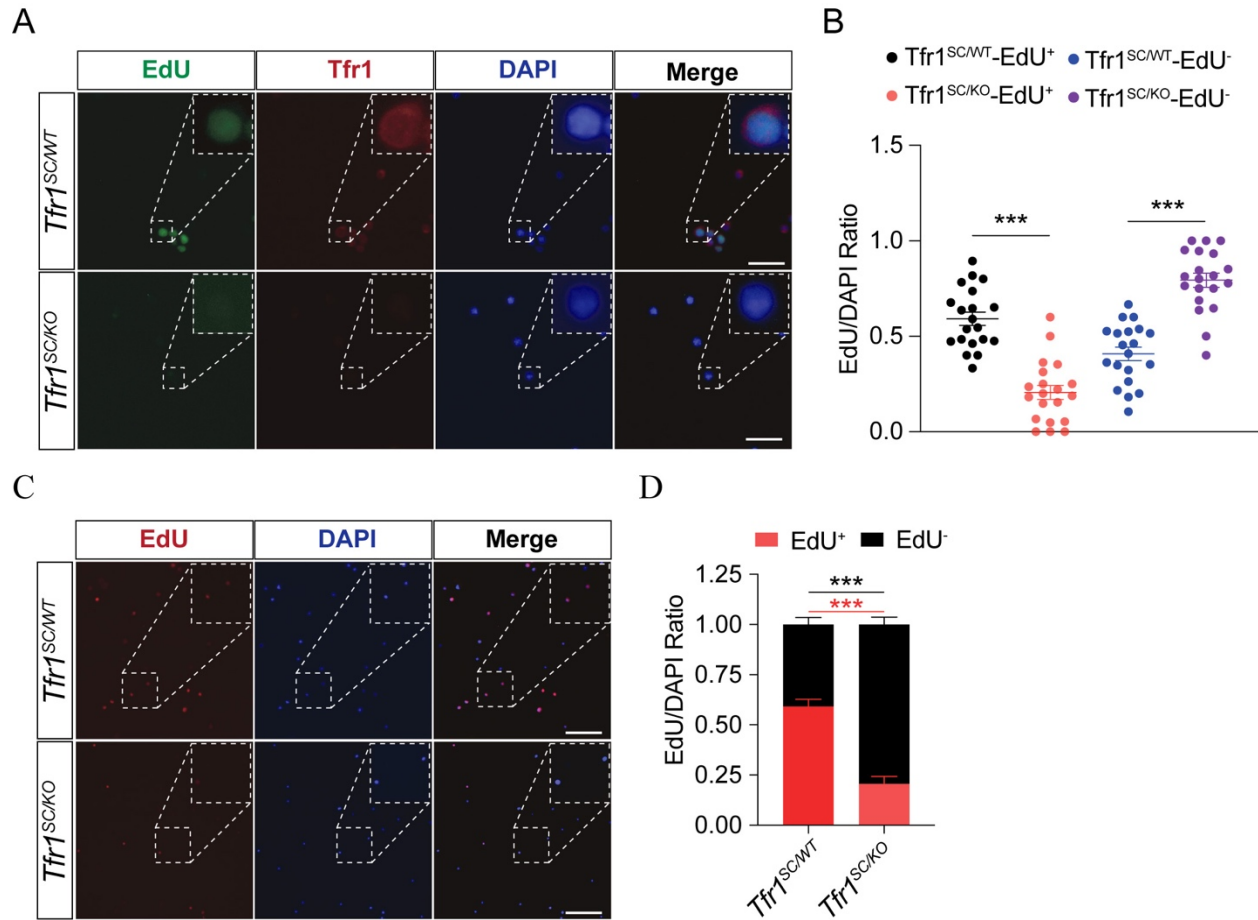

1247

1248

1249

1250

1251

1252

1253

1254

1255

1256

1257

1258

**Figure S5 Related to Figure 2 *Tfr1*-ablation in myoblasts prevents the proliferation.** Pax7<sup>+</sup> SCs were isolated from *Tfr1<sup>fl/fl</sup>* mice and culture with F10 medium. Myoblasts were treated with Adenovirus expression Cre recombinase or GFP as control. 24 hrs later, myoblasts were further treated with EdU for 24 hrs before immunostaining. (A) Representative images of myoblasts immunostaining with EdU (green), Tfr1 (red) and DAPI (blue) indicates that Tfr1-ablation inhibits myoblast proliferation; (B) Number of EdU<sup>-</sup> and EdU<sup>+</sup> myoblasts in total DAPI<sup>+</sup> myoblast from both control and Tfr1-delted group; (C) Representative images of myoblasts immunostaining with EdU (red) and DAPI (blue) indicates that *Tfr1*-ablation inhibits myoblast proliferation; (D) Stacking bar graph showing the ratio of EdU<sup>-</sup> and EdU<sup>+</sup> myoblasts. N.S.: not significant, \*\*\*P < 0.005, by 2-sided Student's t-test. Data represent the mean ± SEM.

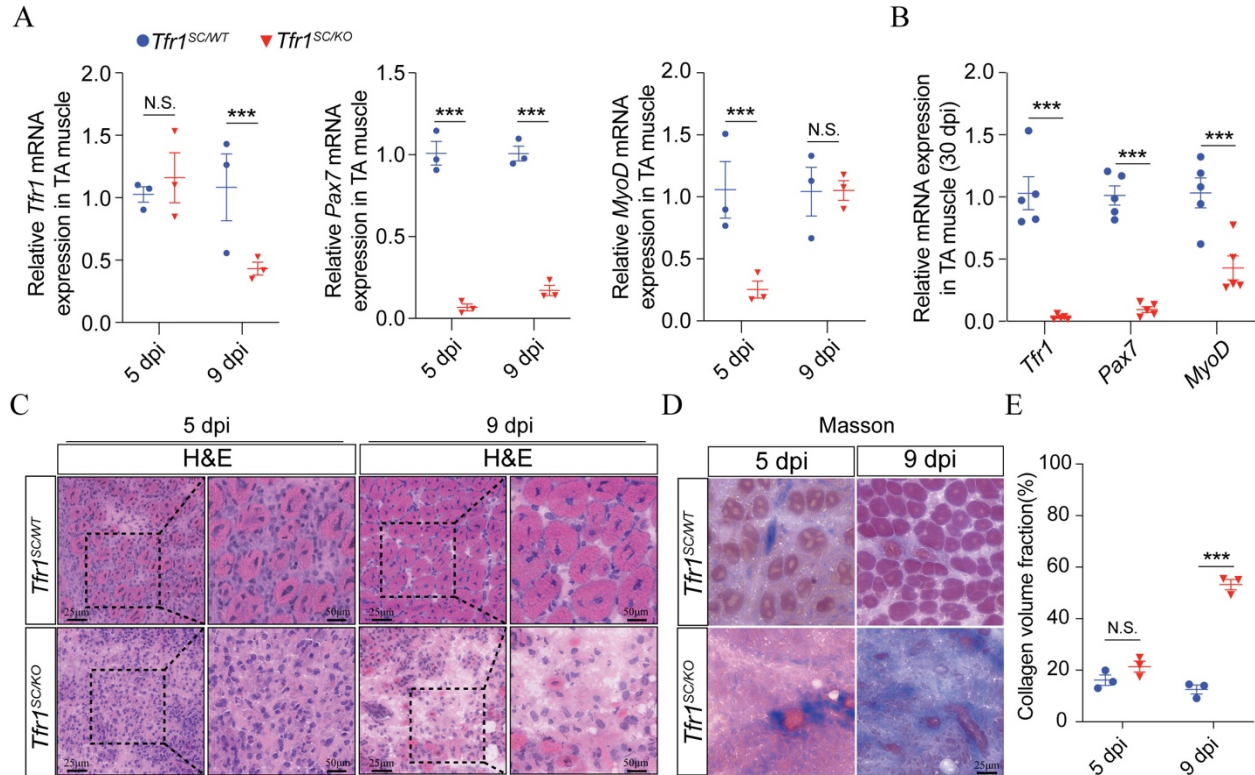

1259  
1260  
1261  
1262  
1263  
1264  
1265  
1266  
1267  
1268  
1269  
1270

**Figure S6 Related to Figure 3 *Tfr1*-ablation in SCs inhibits SCs proliferation and skeletal muscle regeneration.** (A) qPCR analysis of *Tfr1*, *Pax7* and *MyoD* expression in TA muscle from *Tfr1*<sup>SC/WT</sup> and *Tfr1*<sup>SC/KO</sup> mice after CTX-induced injury at 5 and 9 dpi; (B) qPCR analysis of *Tfr1*, *Pax7* and *MyoD* expression in TA muscle of *Tfr1*<sup>SC/WT</sup> and *Tfr1*<sup>SC/KO</sup> mice after CTX-induced injury at 30 dpi; (C) Representative images of TA section H.E. staining of *Tfr1*<sup>SC/WT</sup> and *Tfr1*<sup>SC/KO</sup> mice after CTX-induced injury at 5 and 9 dpi; (D) Representative images of TA section Masson staining of *Tfr1*<sup>SC/WT</sup> and *Tfr1*<sup>SC/KO</sup> mice after CTX-induced injury at 5 and 9 dpi; (E) Summary of collagen volume fraction on TA section of *Tfr1*<sup>SC/WT</sup> and *Tfr1*<sup>SC/KO</sup> mice after CTX-induced injury at 5 and 9 dpi. N.S.: not significant, \*\*\*P < 0.005, by 2-sided Student's t-test. Data represent the mean ± SEM.

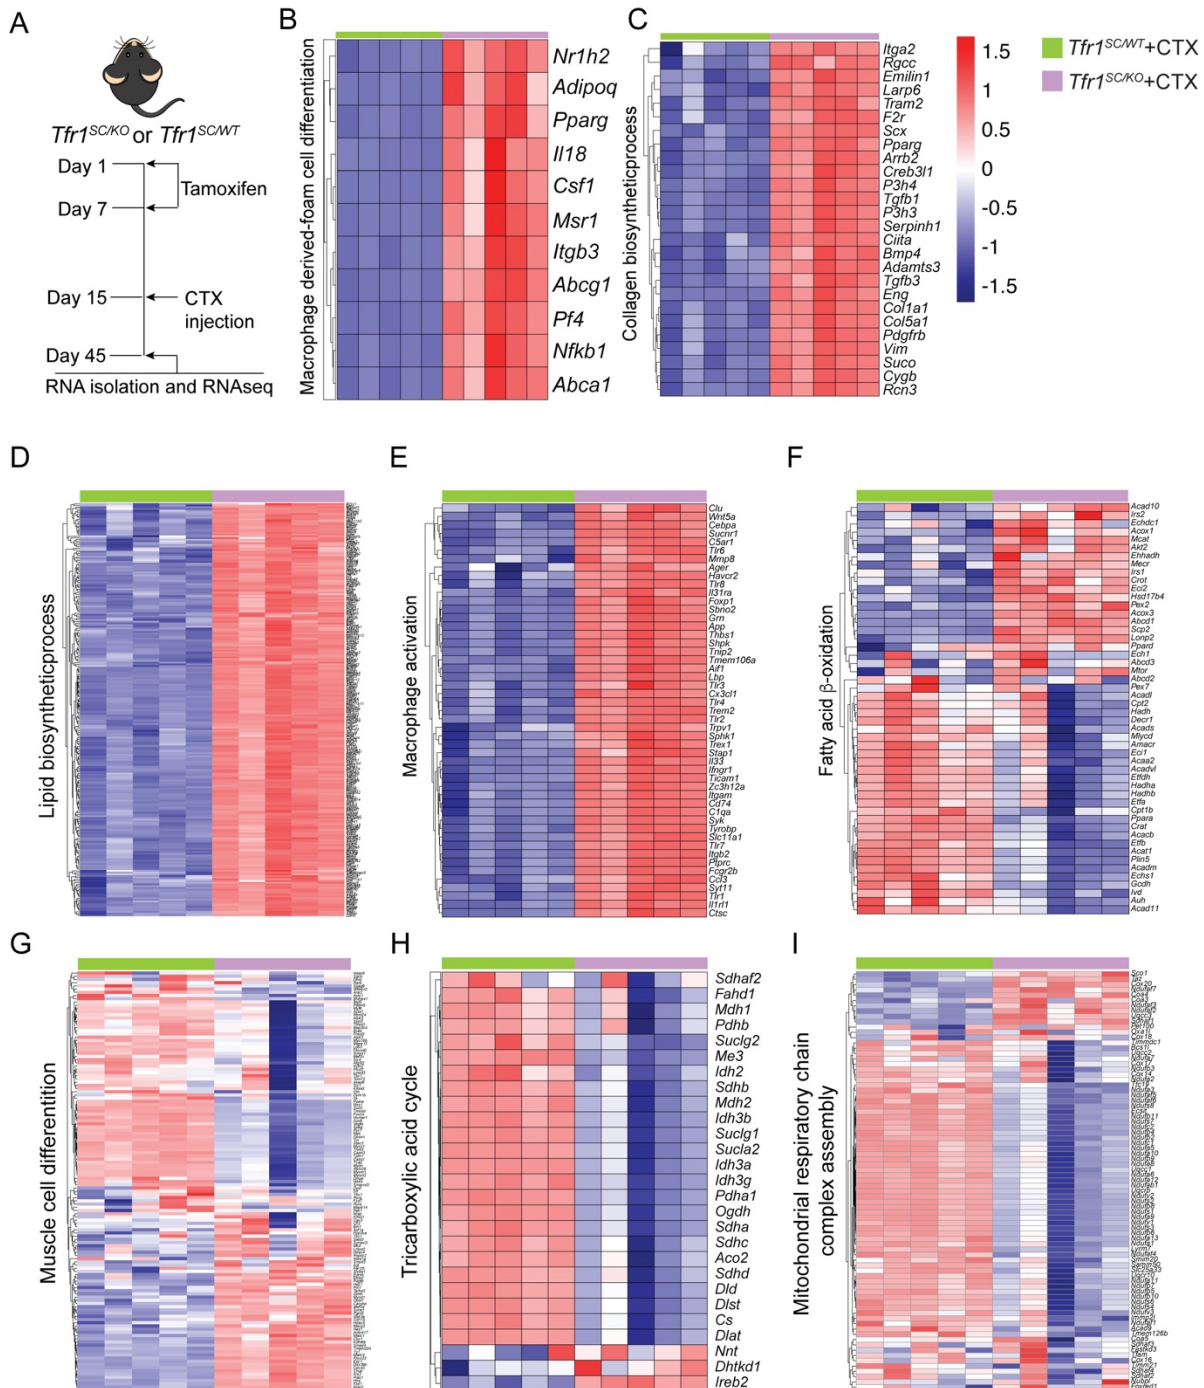

1271  
 1272 **Figure S7 Related to Figure 4 Gene expression profile in TA muscle between *Tfr1*<sup>SC/WT</sup> and**  
 1273 ***Tfr1*<sup>SC/KO</sup> mice after CTX-induced injury at 30 dpi. (A) Timeline for tamoxifen-induced *Tfr1***  
 1274 **deletion and CTX-induced TA muscle injury; (B) Heatmap of macrophage-derived foam cell**  
 1275 **differentiation related gene expression; (C) Heatmap of collagen biosynthetic process related**  
 1276 **gene expression; (D) Heatmap of lipid biosynthetic process related gene expression; (E)**  
 1277 **Heatmap of macrophage activation related gene expression; (F) Heatmap of fatty acid  $\beta$ -**  
 1278 **oxidation related gene expression; (G) Heatmap of muscle cell differentiation related gene**  
 1279 **expression; (H) Heatmap of tricarboxylic acid cycle related gene expression; (I) Heatmap of**  
 1280 **mitochondrial respiratory chain complex assembly related gene expression.**

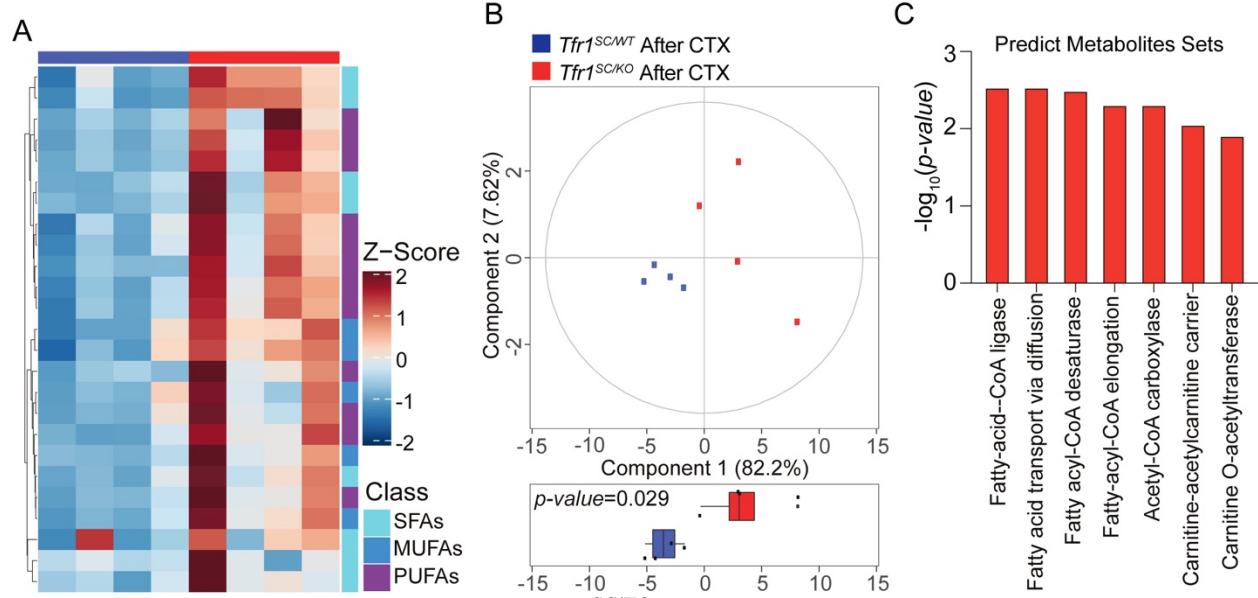

1281  
1282 **Figure S8 Related to Figure 5 TA of *Tfr1<sup>SC/KO</sup>* mice has different lipogenesis profiling.** (A)  
1283 Heatmap presenting the amount of SFAs, MUFAs and PUFA between *Tfr1<sup>SC/WT</sup>* and *Tfr1<sup>SC/KO</sup>*  
1284 mice after CTX-induced injury at 15 30 dpi; (B) PCA of lipid profiling between *Tfr1<sup>SC/WT</sup>* and  
1285 *Tfr1<sup>SC/KO</sup>* mice after CTX-induced injury at 15 30 dpi; (C) Bar graph showing the predicted  
1286 pathway enrichment.  
1287



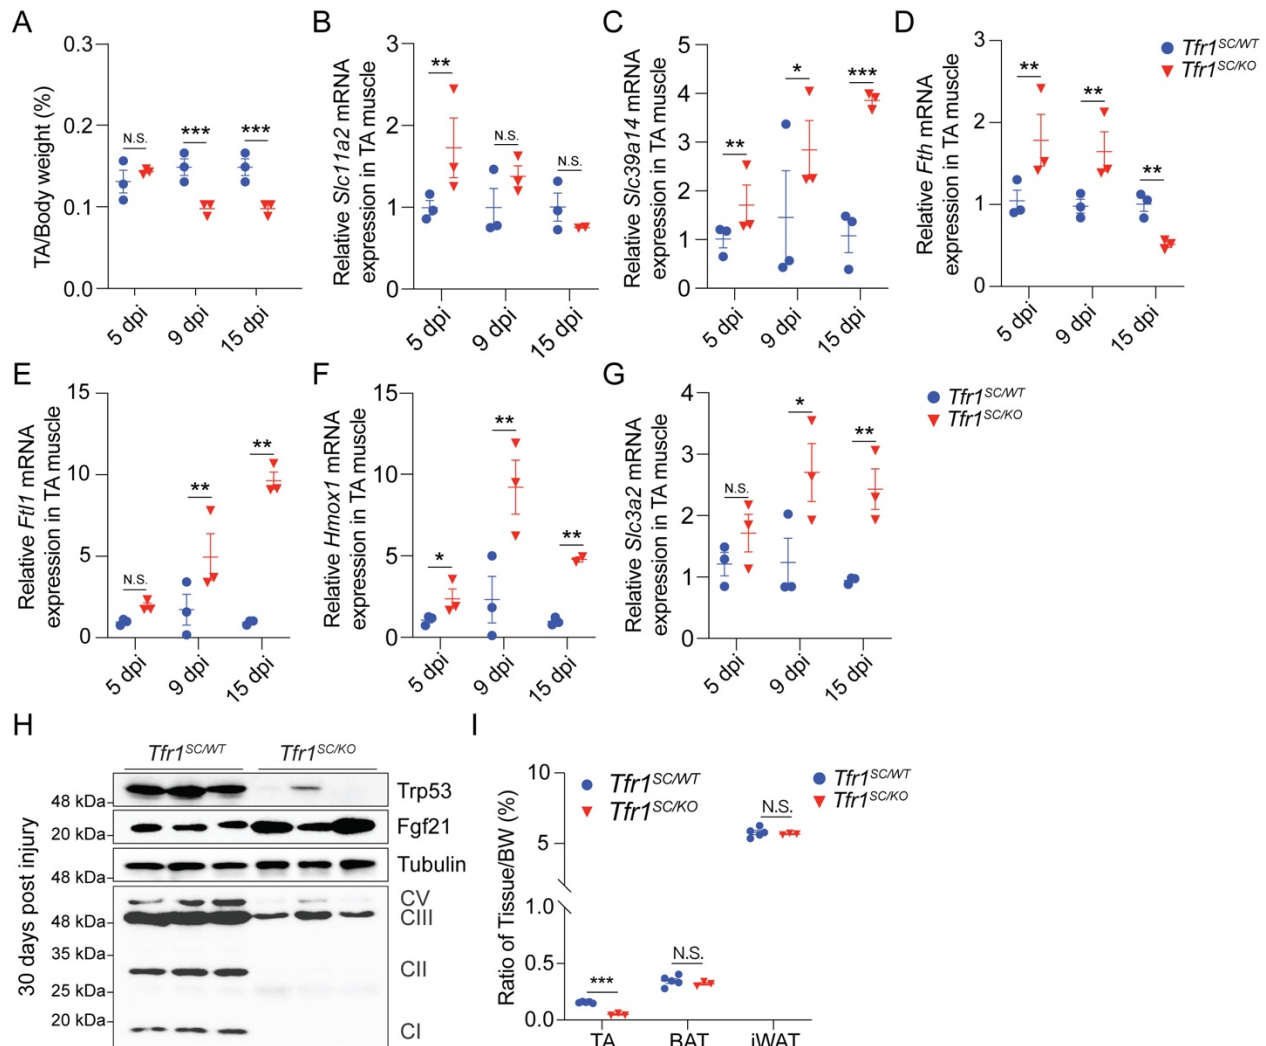

1288  
1289  
1290  
1291  
1292  
1293  
1294  
1295  
1296  
1297  
1298

**Figure S9 Related to Figure 6 *Slc39a14*-mediated NTBI absorption exacerbates skeletal muscle ferroptosis for *Tfr1<sup>SC/KO</sup>* mice.** (A) Ratio of TA/body weight between *Tfr1<sup>SC/WT</sup>* and *Tfr1<sup>SC/KO</sup>* mice after CTX-induced injury at 5, 9 and 15 dpi; (B-G) qPCR analysis of *Slc11a2*, *Slc39a14*, *Fth1*, *Ftl*, *Hmox1*, *Slc3a2* expression in TA muscle of *Tfr1<sup>SC/WT</sup>* and *Tfr1<sup>SC/KO</sup>* mice after CTX-induced injury at 5, 9 and 15 dpi; (H) Representative western blot images of protein level in TA between *Tfr1<sup>SC/WT</sup>* and *Tfr1<sup>SC/KO</sup>* mice after CTX-induced injury at 30 dpi; (I) Ratio of tissue (TA, iBAT and iWAT)/body weight between *Tfr1<sup>SC/WT</sup>* and *Tfr1<sup>SC/KO</sup>* mice after CTX-induced injury at 30 dpi. N.S.: not significant, \* $P < 0.05$ , \*\* $P < 0.01$ , \*\*\* $P < 0.005$ , by 2-sided Student's t-test. Data represent the mean  $\pm$  SEM.



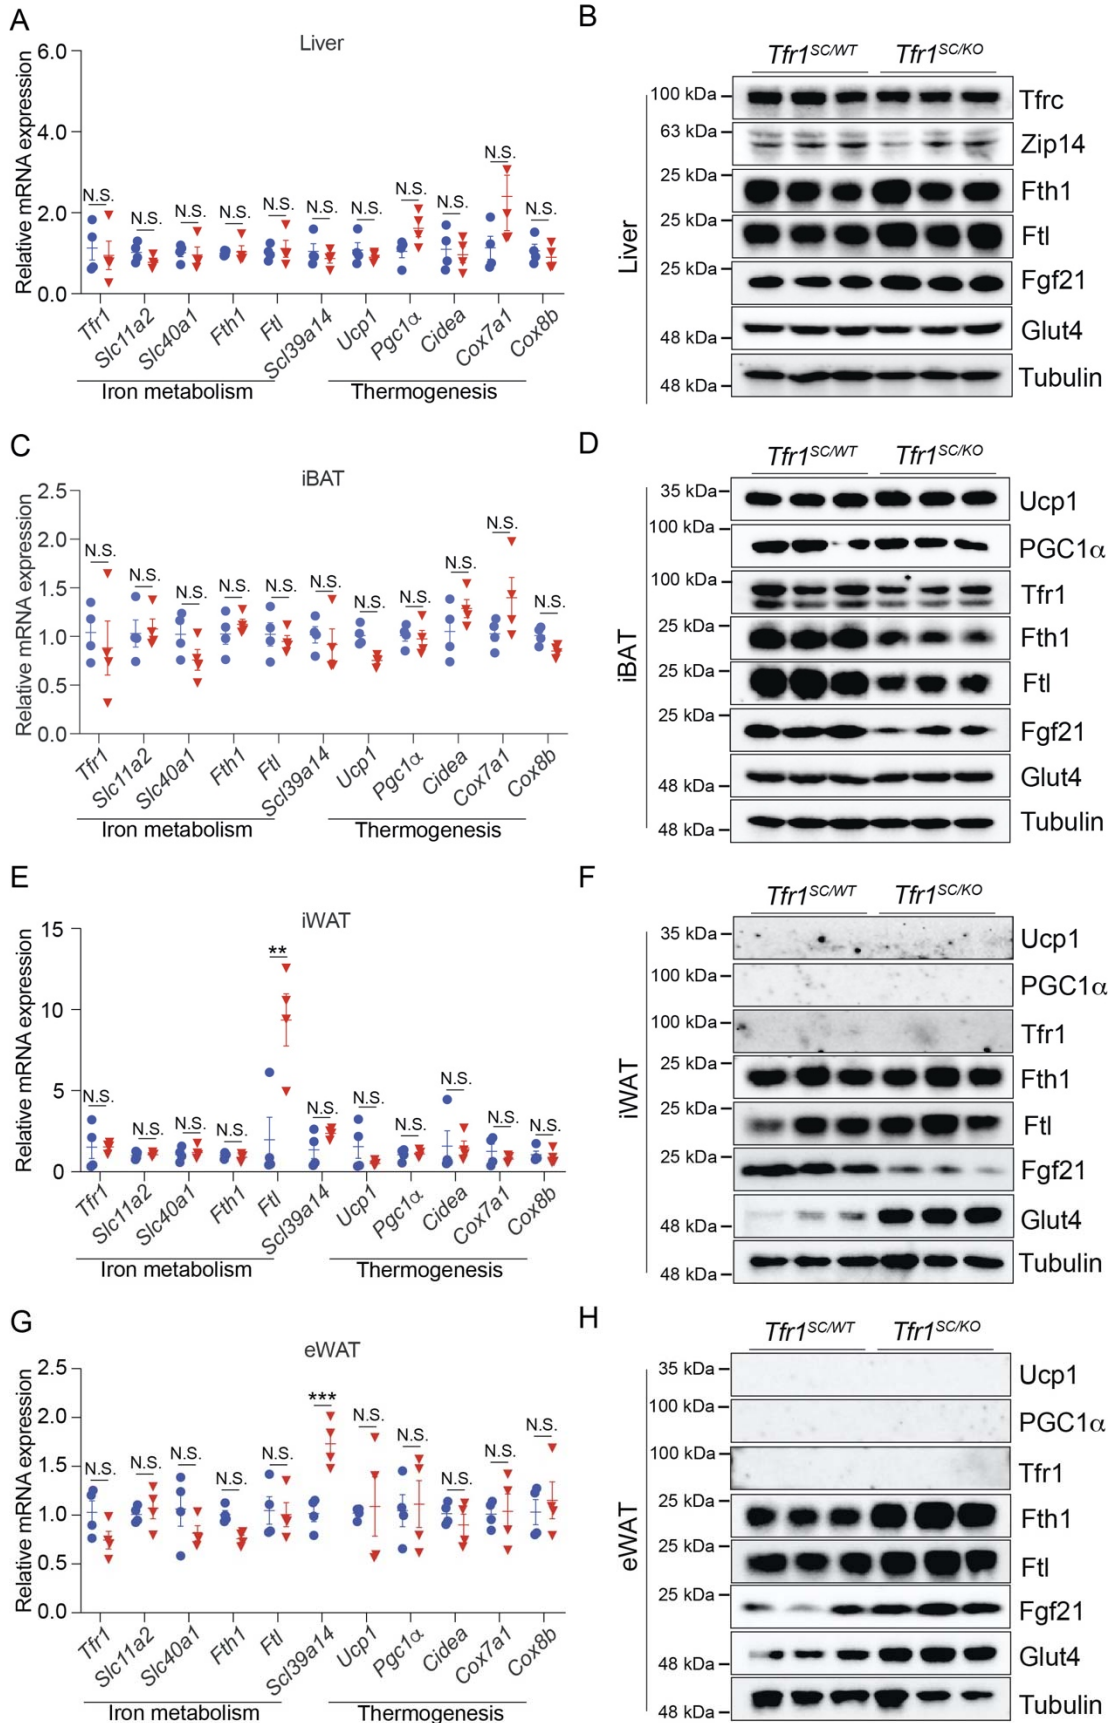

1300 **Figure S10 Related to Figure 6 SC-specific Tfr1 deletion induced TA muscle regeneration**  
 1301 **defect does not perturb systemic metabolism.** (A, C, E and G) qPCR analysis of iron  
 1302 metabolism and thermogenesis related gene expression in Liver (A), iBAT (C), iWAT (E) and  
 1303 eWAT (G) between *Tfr1<sup>SC/WT</sup>* and *Tfr1<sup>SC/KO</sup>* mice after CTX-induced injury at 30 dpi. (B, D, F  
 1304 and. H) Representative western blot images of protein level in Liver (B), iBAT (D), iWAT (F)  
 1305 and eWAT (I) between *Tfr1<sup>SC/WT</sup>* and *Tfr1<sup>SC/KO</sup>* mice after CTX-induced injury at 30 dpi. N.S.:  
 1306 not significant, \*\*P < 0.01, \*\*\*P < 0.005, by 2-sided Student's t-test. Data represent the mean ±  
 1307 SEM (n=6/group).  
 1308  
 1309

Table 1 Primer sequence for qPCR

| Gene Name | Forward Primer               | Reverse Primer            |
|-----------|------------------------------|---------------------------|
| Rps18     | CGCCATGTCTCTAGTGATCC         | GGTCGATGTCTGCTTTTCCTC     |
| Tfr1      | TCGTACAGCAGCGGAAGT           | TCTCCACGAGCGGAATACAG      |
| Slc11a2   | CCAGGATGTGGAGCACCTA          | GCTTGTGAACGTGAGGATGG      |
| Slc40a1   | TTGTGGCAGGAGAAAACAGG         | GCCAATGACTGGAGAACCAA      |
| Slc39a14  | GCTGCTGCTATTTGGGTCTG         | GACAAAGGGGACCAGAAAGC      |
| Fth1      | GTGCGCCAGAACTACCAC           | AGCCACATCATCTCGGTCA       |
| Ftl       | CTACCTCTCTCTGGGCTTCTT        | ATGGCCAAGGCAGCTTC         |
| Pax7      | TGCCCTCAGTGAGTTCGATT         | GAGGTCGGGTTCTGATTCCA      |
| MyoD      | CGCCACTCCGGGACATAG           | GAAGTCGTCTGCTGTCTCAAAGG   |
| Cd86      | GCCACCCACAGGATCAATTA         | TTCGGGTGACCTTGCTTAGA      |
| Cd163     | CTCACGGCACTCTTGTTTG          | GATCATCCGCCTTTGAATCCATC   |
| Cd206     | CCTTCAGAGGGGTTACCT           | TGCCAGGGTCACCTTTCA        |
| Col5a3    | GATCTCTTGGTCCTCGTGGAG        | CCCAGAGGTCTCTGCAACT       |
| Col6a1    | CCTGCTGTGAGTGCACATG          | ATCTGGTTGTGGCTGTA         |
| Col11a2   | GACTCTCTGCGGGAGGAG           | TCCTGCTGTGAAGTTGCAG       |
| Col12a1   | AGTGCTGGAGCCAGAGG            | CCTTTCTCTCCAGGCAAACC      |
| Col23a1   | ACCGGGAGACTTTGGCC            | ATCTTGTCCGGGCTCTCC        |
| Adipoq    | GTT GGA TGG CAG GCA TCC      | AGG AAA GGA GAG CCT GGA G |
| Fasn      | AACCTGGCCATGGTTTTGAG         | GCCTGCGCTGTTACATATA       |
| Cd36      | TTCAATGGAAAGGATAACATAAGCAAAG | CTGTGCCATTAATCATGTGCGCA   |
| Pgc1a     | CTCTGGAAGTGCAGGCCTAA         | TGCCTTGGGTACCAGAACA       |
| Cox7a1    | AGCTGCTGAGGACGCA             | GCTTCTGCTTCTCTGCCAC       |
| Cox8b     | TTCCCAAAGCCCATGTCTCT         | GGCTAAGACCCATCCTGCT       |
| Ucp1      | ATACTGGCAGATGACGTCCC         | CGAGTCGCAGAAAAGAAGCC      |
| Cidea     | ATACATCCAGCTCGCCCTTT         | ACTTACTACCCGGTGTCCAT      |
| Gpx4      | CCGGCTACAACGTCAAGTTT         | CACGCAGCCGTTCTTATCA       |
| Ptgs2     | CGGAGAGAGTTCATCCCTGA         | GCAGTTTATGTTGTCTGTCCAGA   |
| Hmox1     | GAGGTCAAGCACAGGGTGA          | CAGGCTCTGACGAAGTGA        |
| Slc3a2    | CCAAGTACCAGGGCCAGA           | CGTCCTGCAACCAAGAAGTCA     |

|        |                        |                        |
|--------|------------------------|------------------------|
| Elovl5 | GATGACCAAAGGCCTGAAGC   | GGTGGTACCAGTGCAGGA     |
| Elovl6 | CTTCGCAAGAACAACCACCA   | AGAGGTAGGGACGCATGG     |
| Scd1   | ACACCATGGCGTTCCAGA     | GTTTTCCGCCCTTCTCTTTGAC |
| Scd2   | AGCAGAATGGAGGCGAGAAG   | GGCCCCTCATCATCCTGATA   |
| Fads1  | CACCATGCCAAGCCTAACTG   | TGGTTGTATGGCATGTGCTTC  |
| Fads2  | CAAGCCCAACATCTTCCACA   | TCATGCTGGTGGTTGTAGG    |
| Dclk1  | TGAGCATCCCTGGGTTAATGAT | GAAACTCCTGCTGCAGTGC    |
| Cd34   | CCAGGGTATCTGCCTGGAAC   | TCAGCCTCCTCCTTTTCAACA  |
| Cd44   | TTCGATGGACCGGTTACCATAA | AGCTTTCTGGGGTGCTCTT    |
| Kit    | AGAGATTTGGCAGCCAGGA    | TCTCTGGTGCCATCCACTTC   |
| En1    | ACAGCAACCCCTAGTGTGG    | TAGCGGTTTGCCTGGA ACT   |
| Ly6a   | TCAATTACCTGCCCCTACCC   | CAGAGGTCTTCTGGCAACA    |
